# Supplementary material for: Imputation and Reanalysis of ExomeChip Data Identifies Novel, Conditional and Joint Genetic Effects on Parkinson’s Disease Risk
Source: MDPI journal article supplement (doi:10.3390/genes12050689), 2021-05-04
Supplement: s1 [file s1]

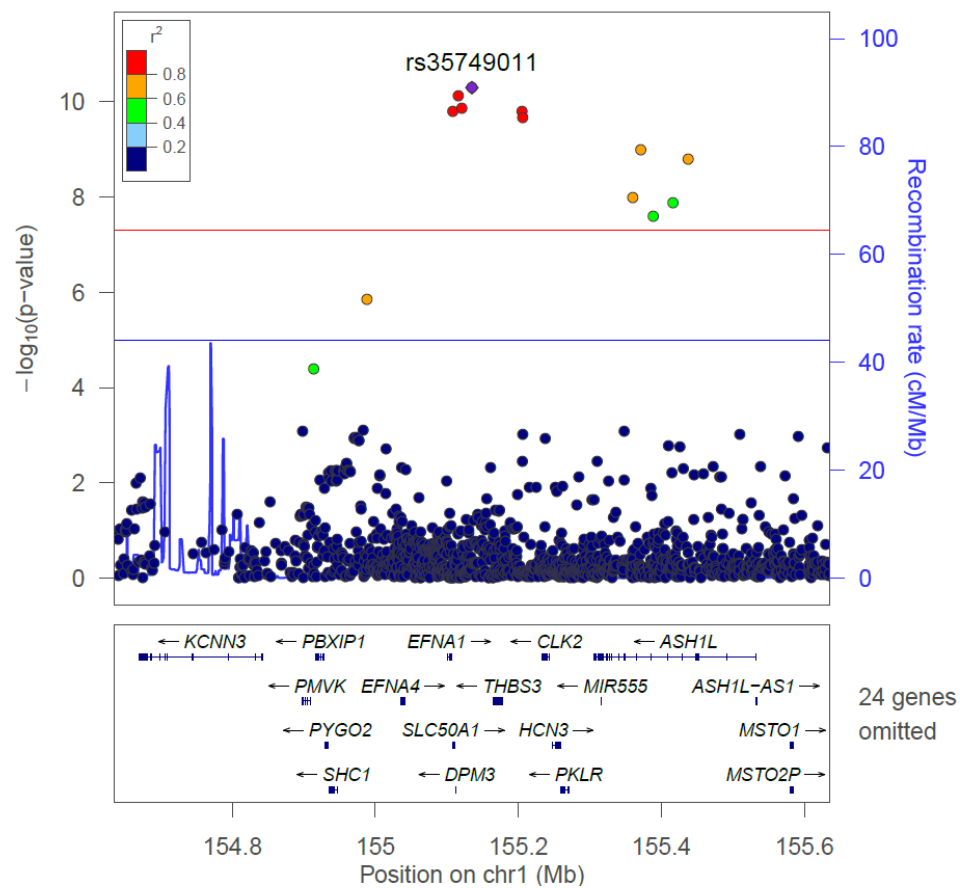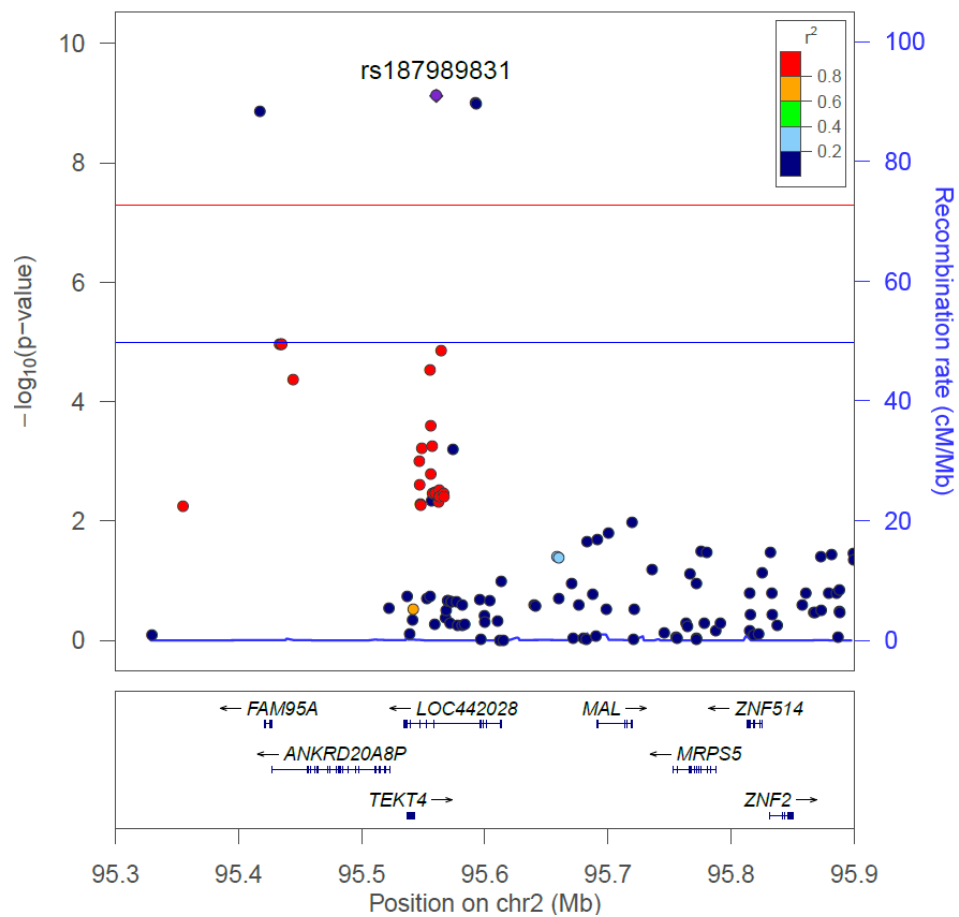

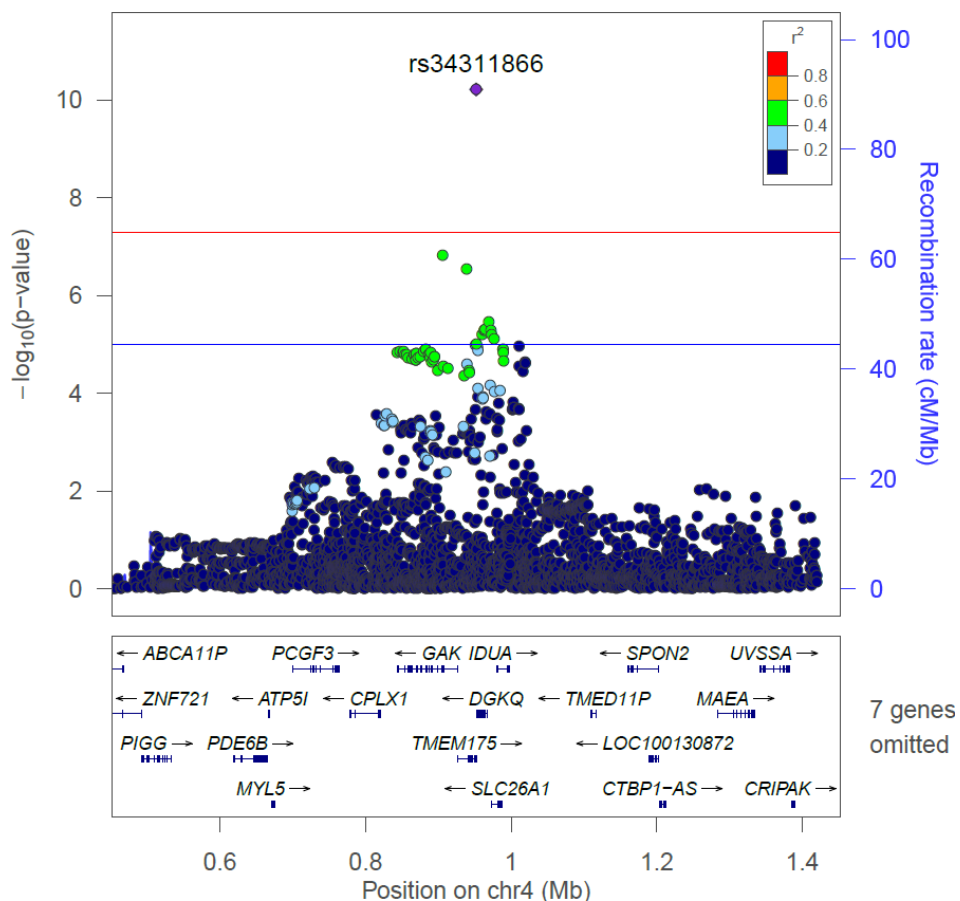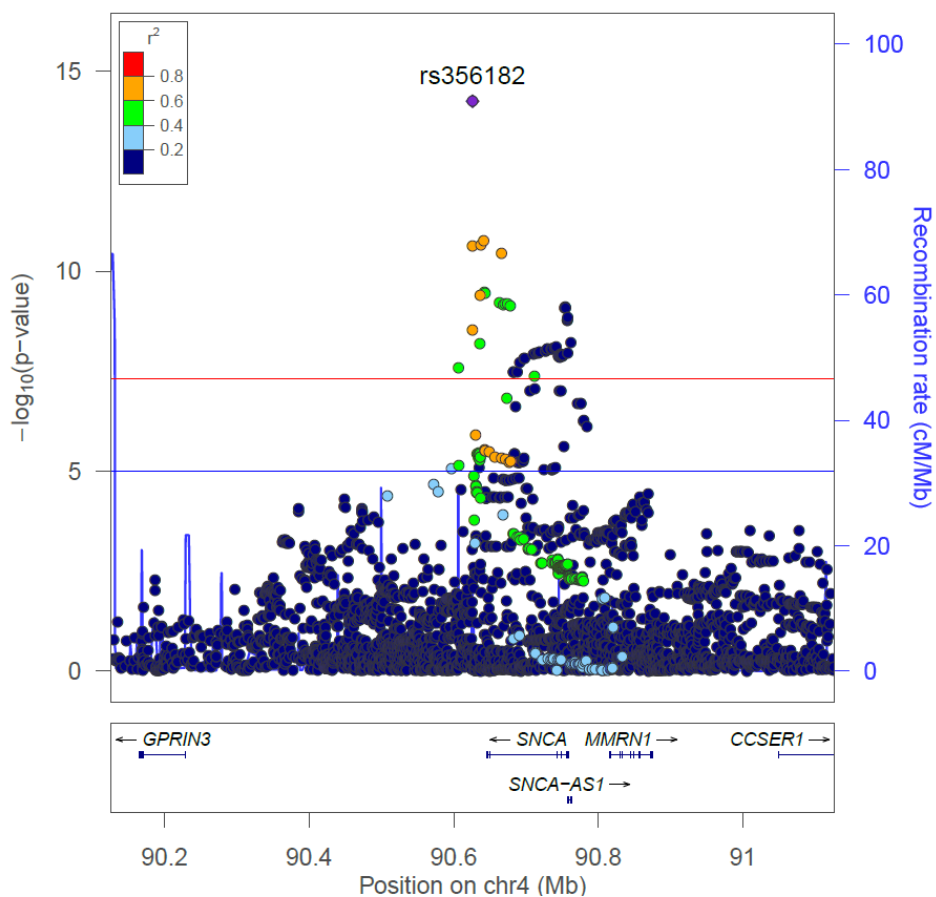

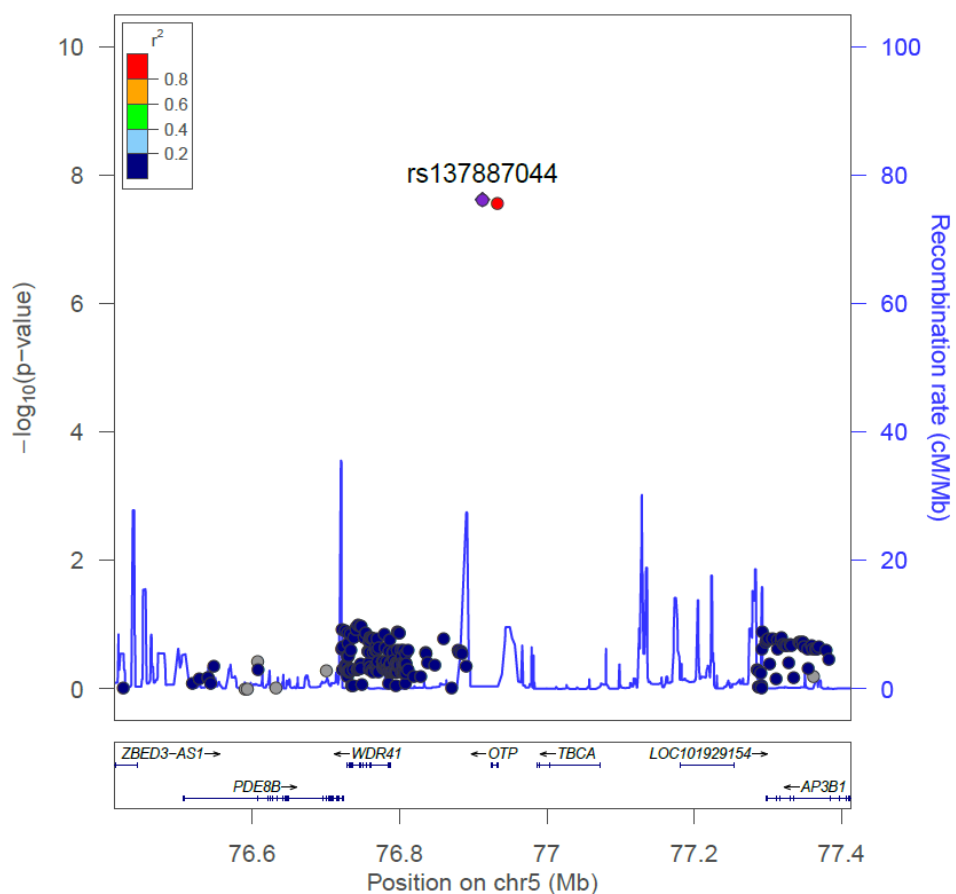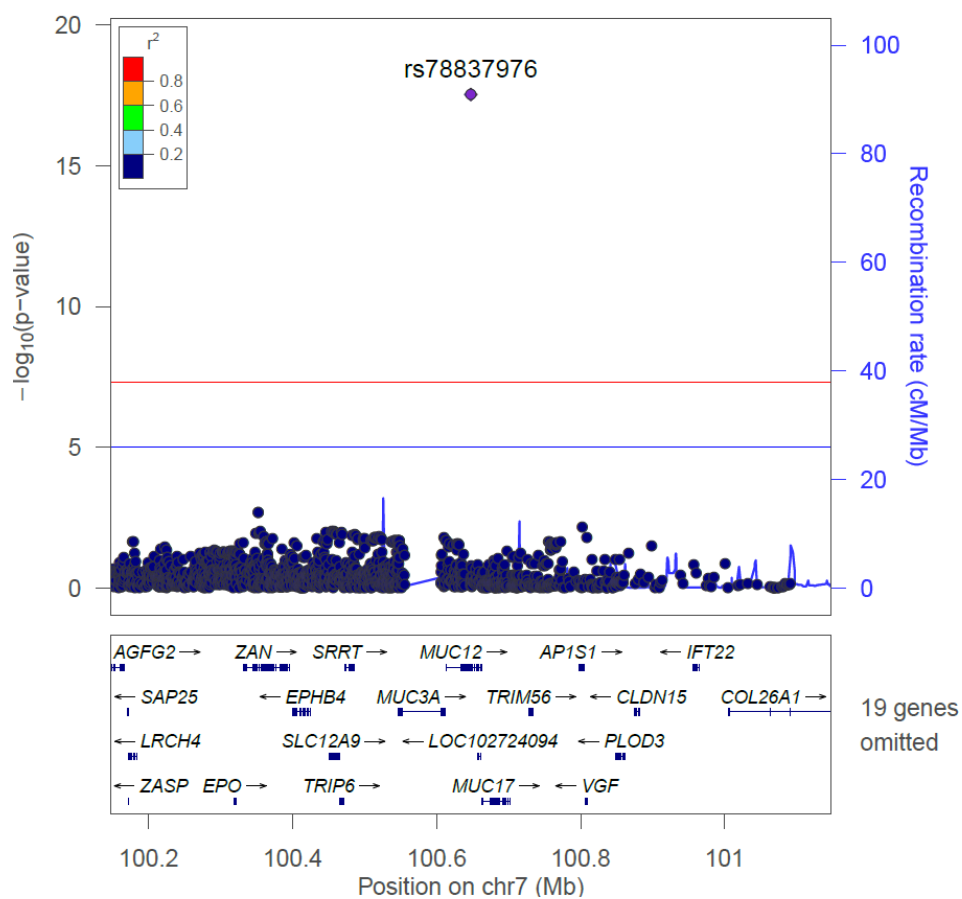

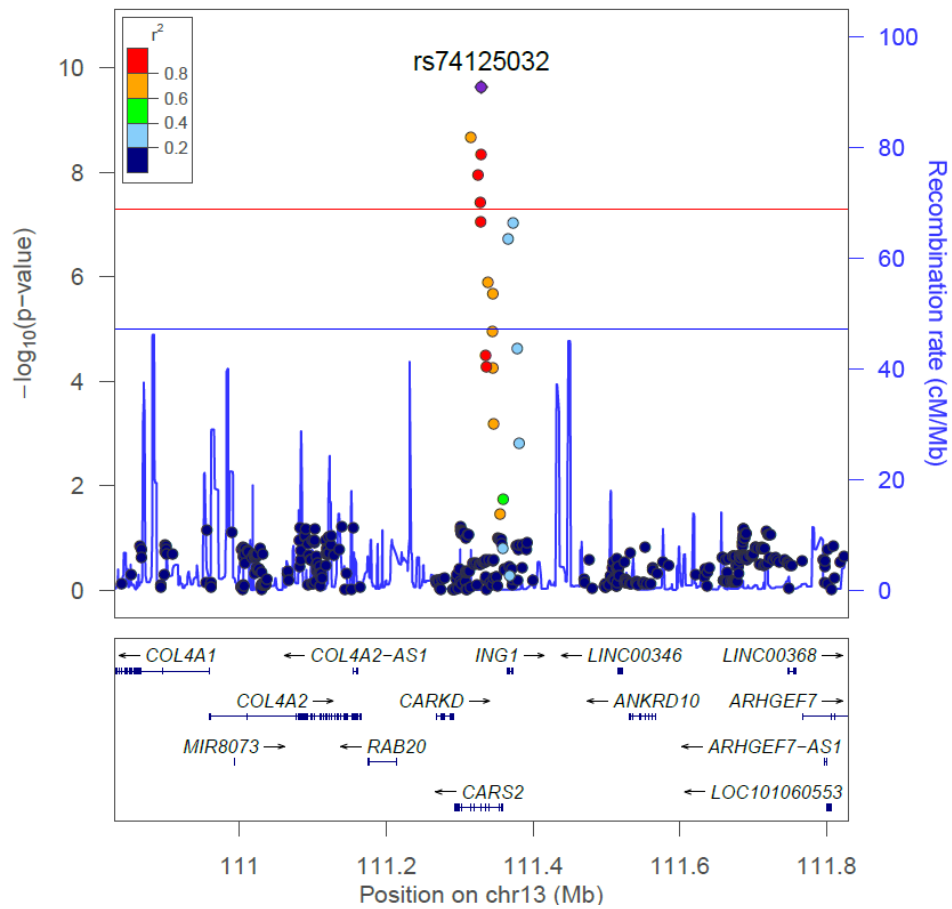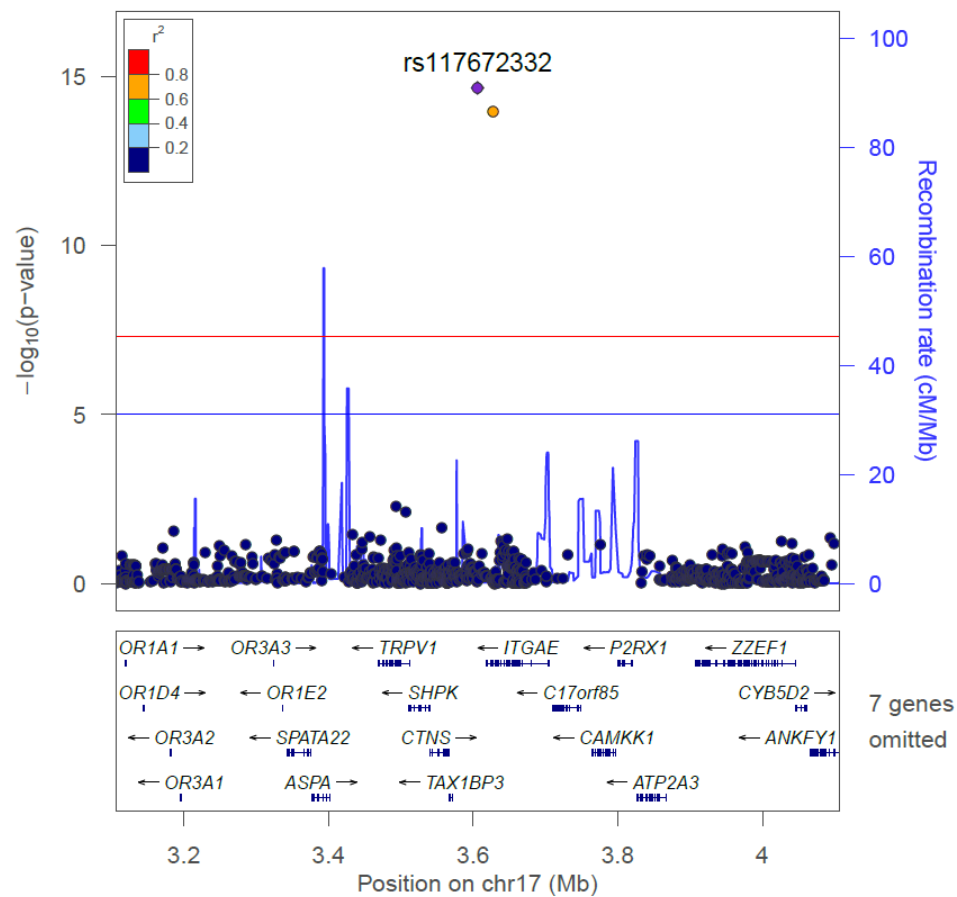

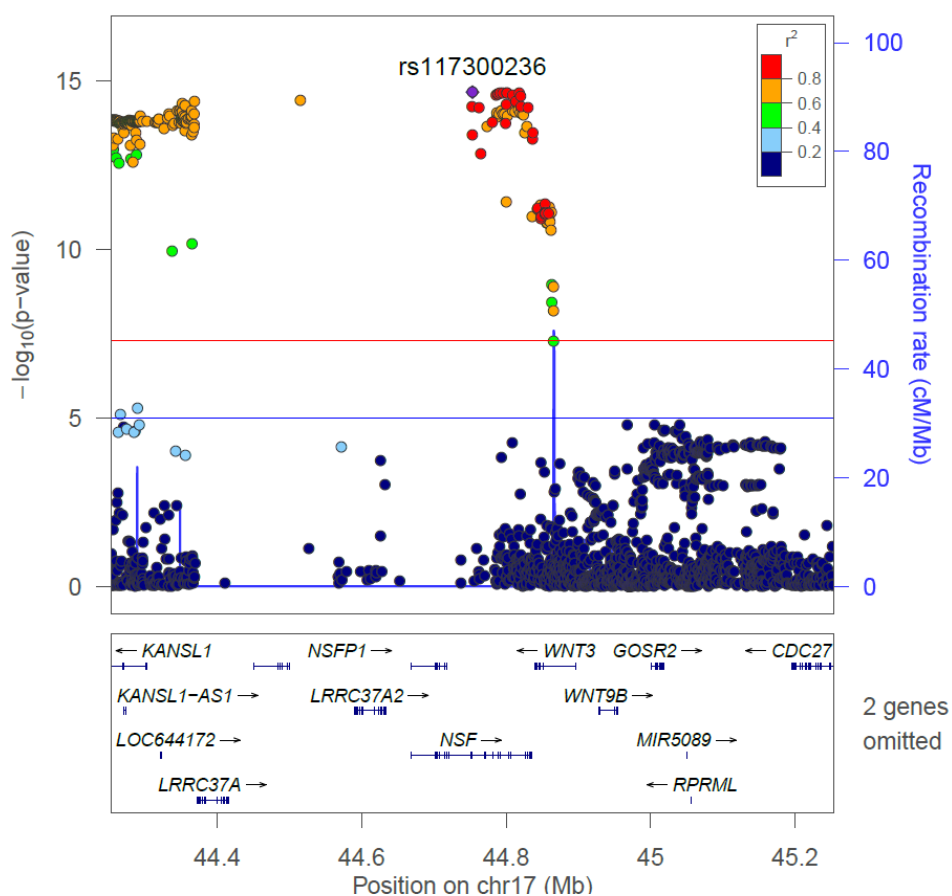

**Supplementary Figure S1: LocusZoom plots of genome-wide significant PD loci having significant secondary association signals.** Association significance with PD is shown as  $-\log_{10}$  p-values on the left y-axis. The most significant SNP represented by purple colour diamond. All other SNPs are shown as circles and are colour coded according to the strength of LD with the most significant SNP (LD measured using the European 1000 Genomes data).

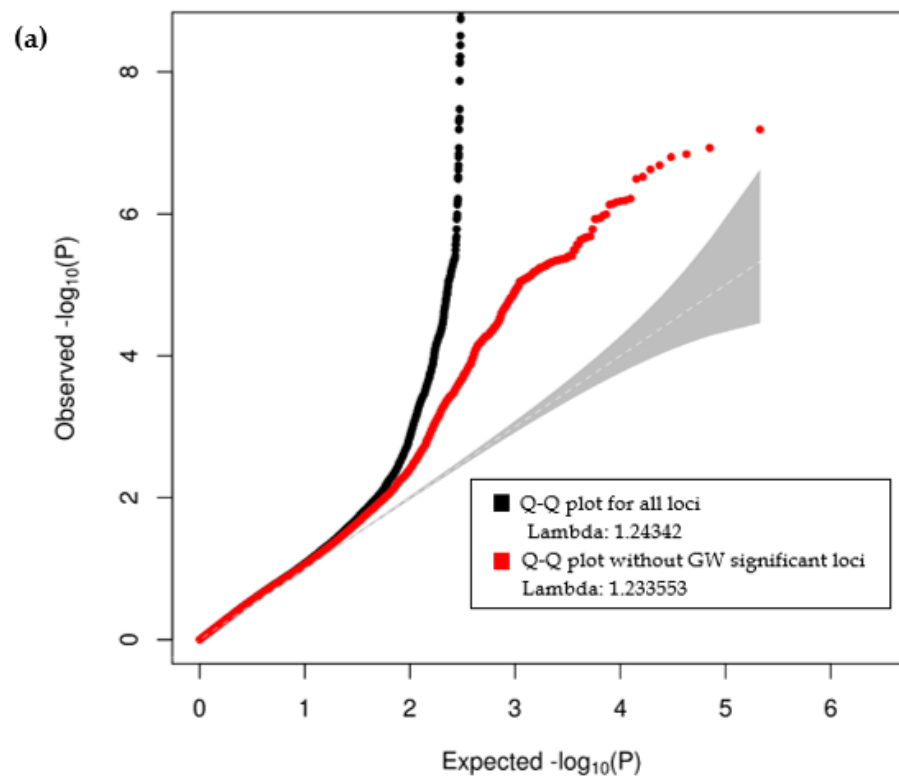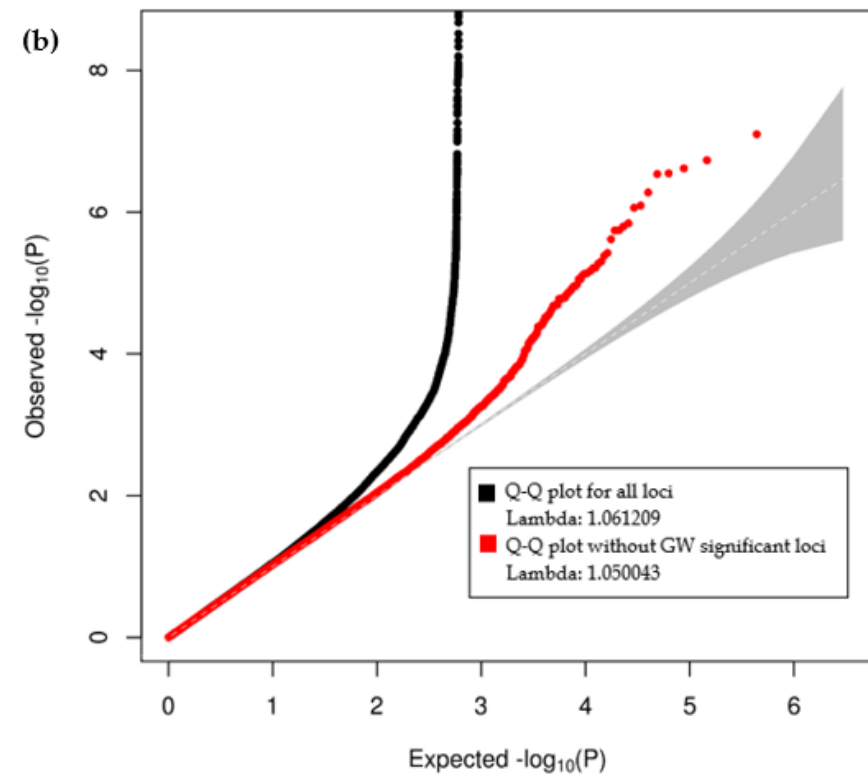

Supplementary Figure S2: Q-Q plot for the association results of genotype data (a) without imputation and (b) with imputation.
