# Supplementary material for: Imputation and Reanalysis of ExomeChip Data Identifies Novel, Conditional and Joint Genetic Effects on Parkinson’s Disease Risk
Source: Genes (Basel). 2021 May 4;12(5):689. doi: 10.3390/genes12050689 (PMC8147919; doi:10.3390/genes12050689)
Supplement: Supplementary file 1 [file genes-12-00689-s001.zip]

Archive with 4 entries (4 files):
- Supplementary Data S1 NeuroX_Reanalysis_Summary_Statistics.txt
- Supplementary Figures S1-S2.pdf
- Supplementary Note S1 Description_NeuroX_Reanalysis_Summary_Statistics.txt
- Supplementary Tables S1-S6.xlsx
