# Supplementary material for: Imputation and Reanalysis of ExomeChip Data Identifies Novel, Conditional and Joint Genetic Effects on Parkinson’s Disease Risk
Source: Genes (Basel). 2021 May 4;12(5):689. doi: 10.3390/genes12050689 (PMC8147919; doi:10.3390/genes12050689)
Supplement: Supplementary file 1 [file genes-12-00689-s001.zip › Supplementary Note S1 Description_NeuroX_Reanalysis_Summary_Statistics.txt]

CHROM 		= Chromosome
POS		= Base position (GRCh37[hg19])
SNP_HRC_ID	= SNP ID in the HRC (v1.1) reference panel
rsID		= SNP rsID
REF 		= Reference allele of the SNP 
ALT		= Alternate allele of the SNP
A1		= Effect allele (minor allele) of the SNP
TEST		= Association test identifier (additive)
OBS_CT		= Number of samples in the regression
OR		= Odds Ratio (for A1 allele)
LOG(OR)_SE	= Standard error of log-odds (i.e., beta)
L95		= Lower 95% confidence interval
U95		= Upper 95% confidence interval
Z_STAT		= Wald Z-score for the association test
P		= P-value for the association test
