# Supplementary material for: Imputation and Reanalysis of ExomeChip Data Identifies Novel, Conditional and Joint Genetic Effects on Parkinson’s Disease Risk
Source: Genes (Basel). 2021 May 4;12(5):689. doi: 10.3390/genes12050689 (PMC8147919; doi:10.3390/genes12050689)
Supplement: Supplementary file 1 [file genes-12-00689-s001.zip › Supplementary Tables S1-S6.xlsx]

## Sheet: S1-Supplementary Table 1
Table S1 | Composition of the initial PD-NuroX sample
		Category	Count	Percentage
Disease status		Cases	5540	48.588
		Controls	5862	51.412
		Total	11402	100
Sex		Male	6842	60.007
		Female	4560	39.993
		Total	11402	100
Age		11-30	288	2.52587
		31-50	1843	16.1638
		51-70	5472	47.9916
		71-90	3748	32.8714
		91-110	51	0.44729
		Total	11402	100
Cohort		France	1039	9.11244
		Germany	2015	17.6723
		Greece	1796	15.7516
		Netherlands	344	3.01701
		UK	1119	9.81407
		USA	5089	44.6325
		Total	11402	100

## Sheet: S2-Supplementary Table 2
Table S2 | Summary of QC process
QC step	No. of samples excluded	Cases and controls	No. of SNPs excluded
Exclude individuals with call rate < 95%	594	cases: 228 and controls: 366
Exclude individuals whose genetically determined sex does not match with clinical data	212	cases: 118 and controls: 94
Exclude individuals with excess heterozygosity (deviate from ± 3 SD from sample heterozygosity rate mean)	57	cases: 27 and controls :31
Exclude SNPs with per SNP missingness >= 5%			13188
Exclude SNPs with MAC < 3			143549
Exclude SNPs with HWE p-value < 1×10^(-6)			456
Exclude samples that are cryptically related by using Pairwise Identity by Descent (IBD) filtering. (pi-hat > 0.2)	1	cases: 1 and controls: 0
Exclude samples with genetic ancestry not consistant with primarily European descent based on comparison with the 1000 Genome populations using PCA.	4	cases: 3 and controls :1
MAC = Minor allele count, HWE = Hardy–Weinberg Equilibrium, PCA =Principal Componant Analysis

## Sheet: S3-Supplementary Table 3
Table S3 | Summary of the GWAS results for genome-wide significant loci.
SNP	CHR	BP	Nearest Gene	EA	NEA	EAF	OR	L95	U95	P
rs35749011	1	155135036	GBA	A	G	0.0153	2.24146	1.76182	2.85169	5.03012e-11
rs145330152	1	155371119	ASH1L	C	A	0.01357	2.22123	1.71904	2.87012	1.04076e-09
rs1281734107	2	95417427	TEKT4	G	A	0.0014	7.57999e-16	9.65564e-21	5.95054e-11	1.40996e-09
rs187989831	2	95560505	TEKT4	C	G	0.005	0.000359353	2.87389e-05	0.00449338	7.56395e-10
rs34311866	4	951947	TMEM175	C	T	0.31849	1.25164	1.17023	1.33871	6.09104e-11
rs356182	4	90626111	SNCA	G	A	0.36596	1.25448	1.18511	1.3279	5.63069e-15
rs983361	4	90761944	SNCA	T	G	0.217	0.819506	0.766273	0.876438	6.29462e-09
rs137887044	5	76912498	WDR41	C	T	0.972	1.8504	1.4908	2.27	2.40508e-08
rs78837976	7	100647511	MUC12	C	T	0.989	16.6736	9.0911	33.3347	2.98175e-18
rs74125032	13	111329589	CARS2	T	C	0.002	4.49847e-10	5.77807e-13	3.50225e-07	2.35547e-10
rs117672332	17	3606117	HASPIN	T	C	0.989	7.6928	4.7648	12.5073	2.2027e-15
rs56220387	17	43476807	ARHGAP27	G	A	0.17114	0.764071	0.709563	0.822765	1.03188e-12
rs62065453	17	43573419	LOC107984156	T	C	0.2004	0.755915	0.70472	0.810829	5.25359e-15
rs382362	17	43691377	LINC02210-CRHR1	C	T	0.17843	0.734929	0.680377	0.793855	5.01583e-15
rs62056931	17	43789698	LINC02210-CRHR1	A	G	0.20236	0.761938	0.711229	0.816262	1.01294e-14
rs62055888	17	43838720	CRHR1	T	C	0.20008	0.761921	0.710947	0.81655	1.39947e-14
rs7221167	17	43933307	MAPT	C	T	0.396	0.847932	0.799836	0.898921	3.08396e-08
rs17649553	17	43994648	MAPT	T	C	0.226	0.767645	0.716971	0.8219	3.22169e-14
rs8079501	17	44000234	MAPT	T	A	0.20389	0.766495	0.715793	0.820788	2.61781e-14
rs113434679	17	44126765	KANSL1	A	C	0.176	0.748214	0.693317	0.807457	8.60276e-14
rs4471723	17	44205690	KANSL1	T	C	0.20721	0.76314	0.712801	0.817034	8.22977e-15
rs2532363	17	44333423	ARL17B	T	G	0.2036	0.761257	0.710468	0.815676	9.68799e-15
rs151172887	17	44515243	LRRC37A2/NSF	T	C	0.22174	0.755983	0.705075	0.810567	3.70482e-15
rs117300236	17	44753350	NSF	A	G	0.25775	0.75627	0.705827	0.810318	2.15773e-15
rs199501	17	44862613	WNT3	A	G	0.22413	0.794626	0.743956	0.848747	8.01834e-12
CHR = chromosome; BP = base position in GRCh37 (hg19); OR = odds ratio; EA = effect allele; NEA = non-effect allele; EAF = effect allele frequency; OR and P-value = odds ratio and p-value from association analyses.

## Sheet: S4-Supplementary Table 4
Table S4 | Comparison of association results with Nalls et. al.
SNP information							Nalls et al.					Reanalysis of PD-NeuroX data
							Discovery phase (13,728 cases and 95,282 controls)		LD between original SNP and proxy SNP	Replication phase (5,353 cases and 5,551 controls)		SNP imputation information			Summary ofassociation results
SNP	CHR	BP	Nearest gene(s)	EA	NEA	EAF	OR	P	LD (r2)	OR	P	EAF	Imputed/genotyped	Imp_Rsq	OR	P
rs35749011	1	155135036	GBA-SYT11	A	G	0.017	1.762	6.09e-23	0.773	2.307*	7.48e-09	0.0153	Imputed	0.9689	2.24146	5.03e-11
rs823118	1	205723572	RAB7L1-NUCKS1	T	C	0.559	1.126	1.36e-13		1.109	0.000143	0.57821	Genotyped	0.99991	1.111	0.00018784
rs10797576	1	232664611	SIPA1L2	T	C	0.14	1.139	1.19e-08		1.11	0.00338	0.1553	Genotyped	0.99967	1.12123	0.00296152
rs6430538	2	135539967	ACMSD-TMEM163	T	C	0.43	0.873	5.56e-15		0.882	9.42e-06	0.4868	Imputed	0.80214	0.86081	5.88e-06
rs1474055	2	169110394	STK39	T	C	0.128	1.213	7.12e-16	0.972	1.218*	1.07e-06	0.131	Imputed	0.96075	1.241	2.82e-07
rs115185635	3	87520857	KRT8P25-APOOP2	C	G	0.035	1.789	2.18e-08	1	0.931*	0.846	0.04251	Imputed	0.91934	0.982753	0.802223
rs12637471	3	182762437	MCCC1	A	G	0.193	0.844	3.32e-16		0.836	3.72e-07	0.188	Genotyped	0.99979	0.8332	3.99e-07
rs34311866	4	951947	TMEM175-GAK-DGKQ	T	C	0.809	0.784	3.58e-33		0.791	6.29e-12	0.7873	Genotyped	0.99639	0.799	6.09e-11
rs11724635	4	15737101	BST1	A	C	0.553	1.122	8.07e-13		1.138	2.73e-06	0.5598	Genotyped	0.99985	1.131	1.18e-05
rs6812193	4	77198986	FAM47E-SCARB2	T	C	0.364	0.897	7.17e-11		0.935	0.011	0.35726	Genotyped	1	0.943359	0.045667
rs356182	4	90626111	SNCA	A	G	0.633	0.737	3.23e-67		0.822	1.75e-12	0.63404	Genotyped	0.99838	0.797	5.63e-15
rs9275326	6	32666660	HLA-DQB1	T	C	0.094	0.797	5.82e-13		0.9	0.018	0.08772	Genotyped	0.99999	0.903401	0.0413748
rs199347	7	23293746	GPNMB	A	G	0.59	1.123	2.37e-12		1.072	0.00766	0.5938	Genotyped	1	1.0749	0.011051
rs117896735	10	121536327	INPP5F	A	G	0.014	1.767	1.21e-11	0.928	1.404*	0.0011	0.0181	Imputed	0.77616	1.52496	0.000464466
rs3793947	11	83544472	DLG2	A	G	0.443	0.912	2.59e-08	0.803	0.976*	0.201	0.44487	Imputed	0.90801	0.98294	0.538451
rs329648	11	133765367	MIR4697	T	C	0.354	1.1	1.65e-08		1.121	4.38e-05	0.37511	Genotyped	0.99776	1.11023	0.000271478
rs76904798	12	40614434	LRRK2	T	C	0.143	1.17	1.33e-12		1.11	0.00369	0.1525	Genotyped	1	1.08996	0.0246883
rs11060180	12	123303586	CCDC62	A	G	0.558	1.101	2.14e-08		1.114	7.26e-05	0.561	Imputed	0.83767	1.133	5.68649e-05
rs11158026	14	55348869	GCH1	T	C	0.335	0.889	7.13e-11		0.948	0.039	0.68817	Genotyped	0.99985	1.0476	0.186
rs1555399	14	67984370	TMEM229B	A	T	0.468	0.872	5.53e-16	0.518	0.971*	0.144	0.4694	Imputed	0.90156	1.03332	0.239361
rs2414739	15	61994134	VPS13C	A	G	0.734	1.114	4.13e-09		1.109	0.000796	0.7491	Imputed	0.905	1.1029	0.00331839
rs14235	16	31121793	BCKDK-STX1B	A	G	0.381	1.094	3.89e-08		1.133	7.72e-06	0.4115	Genotyped	0.99996	1.12892	2.28406e-05
rs17649553	17	43994648	MAPT	T	C	0.226	0.771	4.86e-37		0.764	7.03e-15	0.2047	Genotyped	0.99992	0.767645	3.22169e-14
rs12456492	18	40673380	RIT2	A	G	0.693	0.905	5.12e-09		0.9	0.000216	0.6723	Genotyped	0.99995	0.8985	0.000298873
rs62120679	19	2363319	SPPL2B	T	C	0.314	1.141	2.53e-09	0.493	0.999*	0.518	0.30519	Imputed	0.9194	1.0704	0.0312523
rs8118008	20	3168166	DDRGK1	A	G	0.657	1.111	2.32e-08	0.848	1.113*	0.000118	0.6094	Imputed (r2=1)	0.955	1.120*	1.13E-04*
CHR = chromosome; BP = base position relative in GRCh37 (hg19); EA = effect allele; NEA = non-effect allele, EAF = effect allele frequency; LD (r2) = LD between the original SNP used for discovery phase and the proxy SNP used for replication phase by Nalls et al., OR = odds ratio and P-value = p-value of the association analysis; Imputed/genotyped = whether the SNP is imputed or available in the …

## Sheet: S5-Supplementary Table 5
Table S5 | Genomic region of the SNPs in the imputed dataset
CHR	BP	Minor allele	Genomic region	Nearest gene						CHR	BP	Minor allele	Genomic region	Nearest gene
1	762320	T	ncRNA_exonic	LINC00115						12	86723435	T	intronic	MGAT4C
1	765028	T	ncRNA_intronic	LINC01128						12	86723728	G	intronic	MGAT4C
1	780229	C	ncRNA_intronic	LINC01128						12	86724156	A	intronic	MGAT4C
1	782677	T	ncRNA_intronic	LINC01128						12	86724678	T	intronic	MGAT4C
1	865628	A	exonic	SAMD11						12	86725132	C	intronic	MGAT4C
1	865665	A	exonic	SAMD11						12	86725657	G	intronic	MGAT4C
1	868337	T	intronic	SAMD11						12	86725799	G	intronic	MGAT4C
1	870873	A	intronic	SAMD11						12	86726128	G	intronic	MGAT4C
1	879317	T	exonic	SAMD11						12	86727226	T	intronic	MGAT4C
1	879482	C	exonic	SAMD11						12	86727765	C	intronic	MGAT4C
1	879911	A	UTR3	NOC2L(NM_015658:c.*163T>0),SAMD11(NM_152486:c.*378A>0)						12	86728284	T	intronic	MGAT4C
1	880390	A	intronic	NOC2L						12	86728520	T	intronic	MGAT4C
1	880502	T	exonic	NOC2L						12	86729023	T	intronic	MGAT4C
1	881918	A	exonic	NOC2L						12	86730126	G	intronic	MGAT4C
1	885812	T	intronic	NOC2L						12	86730496	G	intronic	MGAT4C
1	886384	A	intronic	NOC2L						12	86730987	G	intronic	MGAT4C
1	887059	A	intronic	NOC2L						12	86731016	T	intronic	MGAT4C
1	887265	A	intronic	NOC2L						12	86731400	C	intronic	MGAT4C
1	887539	C	intronic	NOC2L						12	86731425	T	intronic	MGAT4C
1	887799	T	exonic	NOC2L						12	86732974	G	intronic	MGAT4C
1	888205	A	intronic	NOC2L						12	86734879	C	intronic	MGAT4C
1	888659	T	exonic	NOC2L						12	86740497	T	intronic	MGAT4C
1	889238	A	exonic	NOC2L						12	86740528	A	intronic	MGAT4C
1	889876	G	intronic	NOC2L						12	86741234	A	intronic	MGAT4C
1	890295	C	intronic	NOC2L						12	86741937	T	intronic	MGAT4C
1	891591	T	exonic	NOC2L						12	86746605	C	intronic	MGAT4C
1	891620	A	intronic	NOC2L						12	86749325	G	intronic	MGAT4C
1	892460	C	intronic	NOC2L						12	86756102	C	intronic	MGAT4C
1	892569	T	exonic	NOC2L						12	86765442	A	intronic	MGAT4C
1	894330	A	exonic	NOC2L						12	86774024	G	intronic	MGAT4C
1	894519	A	intronic	NOC2L						12	86776695	A	intronic	MGAT4C
1	894573	G	intronic	NOC2L						12	86785433	A	intronic	MGAT4C
1	896064	G	UTR5	KLHL17(NM_198317:c.-10G>0)						12	86788281	A	intronic	MGAT4C
1	896333	T	intronic	KLHL17						12	86789705	C	intronic	MGAT4C
1	897009	G	exonic	KLHL17						12	86791317	C	intronic	MGAT4C
1	897641	T	intronic	KLHL17						12	86792851	T	intronic	MGAT4C
1	897730	T	intronic	KLHL17						12	86797901	T	intronic	MGAT4C
1	897738	T	exonic	KLHL17						12	86812273	A	intronic	MGAT4C
1	898467	T	intronic	KLHL17						12	86812988	G	intronic	MGAT4C
1	898511	A	exonic	KLHL17						12	86813440	A	intronic	MGAT4C
1	900208	A	intronic	KLHL17						12	86815177	C	intronic	MGAT4C
1	900397	T	exonic	KLHL17						12	86825316	C	intronic	MGAT4C
1	901806	C	upstream;downstream	PLEKHN1(dist=56);KLHL17(dist=707)						12	86831692	T	intronic	MGAT4C
1	902069	C	intronic	PLEKHN1						12	86832895	T	intronic	MGAT4C
1	902088	A	exonic	PLEKHN1						12	86833049	A	intronic	MGAT4C
1	902288	A	intronic	PLEKHN1						12	86835750	A	intronic	MGAT4C
1	903104	T	intronic	PLEKHN1						12	86850619	G	intronic	MGAT4C
1	906769	A	exonic	PLEKHN1						12	86850977	T	intronic	MGAT4C
1	909053	A	intronic	PLEKHN1						12	86853577	G	intronic	MGAT4C
1	909221	C	exonic	PLEKHN1						12	86859132	G	intronic	MGAT4C
1	909238	G	exonic	PLEKHN1						12	86859266	T	intronic	MGAT4C
1	909419	T	exonic	PLEKHN1						12	86868957	T	intronic	MGAT4C
1	920503	A	intergenic	PERM1(dist=3030),HES4(dist=13841)						12	86871270	T	intronic	MGAT4C
1	920640	T	intergenic	PERM1(dist=3167),HES4(dist=13704)						12	86874591	C	intronic	MGAT4C
1	920977	C	intergenic	PERM1(dist=3504),HES4(dist=13367)						12	86880778	C	intronic	MGAT4C
1	922483	C	intergenic	PERM1(dist=5010),HES4(dist=11861)						12	86881828	T	intronic	MGAT4C
1	922812	T	intergenic	PERM1(dist=5339),HES4(dist=11532)						12	86882715	C	intronic	MGAT4C
1	924544	T	intergenic	PERM1(dist=7071),HES4(dist=9800)						12	86885076	C	intronic	MGAT4C
1	926968	T	intergenic	PERM1(dist=9495),HES4(dist=7376)						12	86886347	T	intronic	MGAT4C
1	929565	T	intergenic	PERM1(dist=12092),HES4(dist=4779)						12	86886573	C	intronic	MGAT4C
1	931500	T	intergenic	PERM1(dist=14027),HES4(dist=2844)						12	86887969	T	intronic	MGAT4C
1	933744	T	downstream	HES4(dist=600)						12	86903269	T	intronic	MGAT4C
1	934770	A	exonic	HES4						12	86908818	A	intronic	MGAT4C
1	935671	G	upstream	HES4(dist=194)						12	86909813	A	intronic	MGAT4C
1	936487	G	intergenic	HES4(dist=1010),ISG15(dist=12390)						12	86929340	C	intronic	MGAT4C
1	936580	A	intergenic	HES4(dist=1103),ISG15(dist=12297)						12	86964891	T	intronic	MGAT4C
1	937250	G	intergenic	HES4(dist=1773),ISG15(dist=11627)						12	87043373	G	intronic	MGAT4C
1	937432	G	intergenic	HES4(dist=1955),ISG15(dist=11445)						12	87126108	A	intronic	MGAT4C
1	941188	A	intergenic	HES4(dist=5711),ISG15(dist=7689)						12	87127849	C	intronic	MGAT4C
1	941747	T	intergenic	HES4(dist=6270),ISG15(dist=7130)						12	87128298	A	intronic	MGAT4C
1	942925	C	intergenic	HES4(dist=7448),ISG15(dist=5952)						12	87129729	C	intronic	MGAT4C
1	945349	A	intergenic	HES4(dist=9872),ISG15(dist=3528)						12	87132128	C	intronic	MGAT4C
1	947809	C	intergenic	HES4(dist=12332),ISG15(dist=1068)						12	87132327	G	intronic	MGAT4C
1	949608	A	exonic	ISG15						12	87133120	T	intronic	MGAT4C
1	949831	T	exonic	ISG15						12	87136991	T	intronic	MGAT4C
1	949889	A	UTR3	ISG15(NM_005101:c.*31A>0)						12	87137226	T	intronic	MGAT4C
1	951730	T	intergenic	ISG15(dist=1811),AGRN(dist=3770)						12	87137487	A	intronic	MGAT4C
1	952345	T	intergenic	ISG15(dist=2426),AGRN(dist=3155)						12	87140681	A	intronic	MGAT4C
1	952538	A	intergenic	ISG15(dist=2619),AGRN(dist=2962)						12	87141799	A	intronic	MGAT4C
1	952641	T	intergenic	ISG15(dist=2722),AGRN(dist=2859)						12	87141991	G	intronic	MGAT4C
1	952642	A	intergenic	ISG15(dist=2723),AGRN(dist=2858)						12	87142419	C	intronic	MGAT4C
1	952746	T	intergenic	ISG15(dist=2827),AGRN(dist=2754)						12	87143541	T	intronic	MGAT4C
1	953745	G	intergenic	ISG15(dist=3826),AGRN(dist=1755)						12	87144897	T	intronic	MGAT4C
1	953908	G	intergenic	ISG15(dist=3989),AGRN(dist=1592)						12	87145223	G	intronic	MGAT4C
1	954032	G	intergenic	ISG15(dist=4113),AGRN(dist=1468)						12	87145574	T	intronic	MGAT4C
1	954066	C	intergenic	ISG15(dist=4147),AGRN(dist=1434)						12	87147087	G	intronic	MGAT4C
1	954134	A	intergenic	ISG15(dist=4215),AGRN(dist=1366)						12	87148891	A	intronic	MGAT4C
1	955078	G	upstream	AGRN(dist=422)						12	87151257	C	intronic	MGAT4C
1	956467	G	intronic	AGRN						12	87151263	T	intronic	MGAT4C
1	956593	G	intronic	AGRN						12	87155910	C	intronic	MGAT4C
1	957105	G	intronic	AGRN						12	87156713	T	intronic	MGAT4C
1	957120	C	intronic	AGRN						12	87157597	G	intronic	MGAT4C
1	957171	G	intronic	AGRN						12	87157810	A	intronic	MGAT4C
1	957640	T	exonic	AGRN						12	87157863	A	intronic	MGAT4C
1	957898	T	intronic	AGRN						12	87164723	A	intronic	MGAT4C
1	961105	T	intronic	AGRN						12	87168271	T	intronic	MGAT4C
1	961372	A	intronic	AGRN						12	87171228	G	intronic	MGAT4C
1	962083	T	intronic	AGRN						12	87185786	C	intronic	MGAT4C
1	962830	G	intronic	AGRN						12	87189989	A	intronic	MGAT4C
1	963338	A	intronic	AGRN						12	87201878	C	intronic	MGAT4C
1	967000	T	intronic	AGRN						12	87206356	C	intronic	MGAT4C
1	968326	T	intronic	AGRN						12	87255414	C	intergenic	MGAT4C(dist=22637),LOC105369879(dist=469102)
1	968345	A	intronic	AGRN						12	87259302	A	intergenic	MGAT4C(dist=26525),LOC105369879(dist=465214)
1	969659	A	UTR5	AGRN(NM_001364727:c.-277A>0)						12	87260006	G	intergenic	MGAT4C(dist=27229),LOC105369879(dist=464510)
1	969773	T	UTR5	AGRN(NM_001364727:c.-163T>0)						12	87260613	G	intergenic	MGAT4C(dist=27836),LOC105369879(dist=463903)
1	970915	T	intronic	AGRN						12	87263693	T	intergenic	MGAT4C(dist=30916),LOC105369879(dist=460823)
1	971120	A	intronic	AGRN						12	87270030	C	intergenic	MGAT4C(dist=37253),LOC105369879(dist=454486)
1	971687	A	intronic	AGRN						12	87273657	G	intergenic	MGAT4C(dist=40880),LOC105369879(dist=450859)
1	972687	C	intronic	AGRN						12	87276957	C	intergenic	MGAT4C(dist=44180),LOC105369879(dist=447559)
1	972752	A	intronic	AGRN						12	87278430	T	intergenic	MGAT4C(dist=45653),LOC105369879(dist=446086)
1	972914	A	intronic	AGRN						12	87279694	C	intergenic	MGAT4C(dist=46917),LOC105369879(dist=444822)
1	974988	T	intronic	AGRN						12	87281219	A	intergenic	MGAT4C(dist=48442),LOC105369879(dist=443297)
1	977028	T	exonic	AGRN						12	87283646	G	intergenic	MGAT4C(dist=50869),LOC105369879(dist=440870)
1	978046	T	intronic	AGRN						12	87283790	T	intergenic	MGAT4C(dist=51013),LOC105369879(dist=440726)
1	978762	A	exonic	AGRN						12	87284604	T	intergenic	MGAT4C(dist=51827),LOC105369879(dist=439912)
1	978974	A	exonic	AGRN						12	87287786	C	intergenic	MGAT4C(dist=55009),LOC105369879(dist=436730)
1	979397	A	exonic	AGRN						12	87288523	C	intergenic	MGAT4C(dist=55746),LOC105369879(dist=435993)
1	979437	T	intronic	AGRN						12	87723347	A	intergenic	MGAT4C(dist=490570),LOC105369879(dist=1169)
1	979690	A	intronic	AGRN						12	87896309	T	intergenic	LOC105369879(dist=170211),LINC02258(dist=266280)
1	979748	T	exonic	AGRN						12	87901028	G	intergenic	LOC105369879(dist=174930),LINC02258(dist=261561)
1	979835	A	intronic	AGRN						12	88348084	A	intergenic	LINC02258(dist=148558),C12orf50(dist=25730)
1	980077	T	intronic	AGRN						12	88348129	A	intergenic	LINC02258(dist=148603),C12orf50(dist=25685)
1	980189	A	intronic	AGRN						12	88348557	G	intergenic	LINC02258(dist=149031),C12orf50(dist=25257)
1	980276	T	intronic	AGRN						12	88348622	A	intergenic	LINC02258(dist=149096),C12orf50(dist=25192)
1	980552	A	exonic	AGRN						12	88348780	C	intergenic	LINC02258(dist=149254),C12orf50(dist=25034)
1	980824	C	exonic	AGRN						12	88348877	T	intergenic	LINC02258(dist=149351),C12orf50(dist=24937)
1	981131	G	exonic	AGRN						12	88349076	A	intergenic	LINC02258(dist=149550),C12orf50(dist=24738)
1	981353	T	exonic	AGRN						12	88349393	A	intergenic	LINC02258(dist=149867),C12orf50(dist=24421)
1	981852	A	exonic	AGRN						12	88349479	C	intergenic	LINC02258(dist=149953),C12orf50(dist=24335)
1	981942	A	exonic	AGRN						12	88349642	T	intergenic	LINC02258(dist=150116),C12orf50(dist=24172)
1	982302	A	exonic	AGRN						12	88350602	G	intergenic	LINC02258(dist=151076),C12orf50(dist=23212)
1	982482	T	intronic	AGRN						12	88351497	G	intergenic	LINC02258(dist=151971),C12orf50(dist=22317)
1	982484	T	intronic	AGRN						12	88352313	T	intergenic	LINC02258(dist=152787),C12orf50(dist=21501)
1	982573	T	intronic	AGRN						12	88352604	A	intergenic	LINC02258(dist=153078),C12orf50(dist=21210)
1	982722	G	exonic	AGRN						12	88352998	C	intergenic	LINC02258(dist=153472),C12orf50(dist=20816)
1	983243	T	exonic	AGRN						12	88353835	T	intergenic	LINC02258(dist=154309),C12orf50(dist=19979)
1	984660	T	exonic	AGRN						12	88354922	A	intergenic	LINC02258(dist=155396),C12orf50(dist=18892)
1	984860	T	intronic	AGRN						12	88355694	C	intergenic	LINC02258(dist=156168),C12orf50(dist=18120)
1	985442	T	intronic	AGRN						12	88356316	C	intergenic	LINC02258(dist=156790),C12orf50(dist=17498)
1	985797	G	intronic	AGRN						12	88356422	A	intergenic	LINC02258(dist=156896),C12orf50(dist=17392)
1	986165	A	exonic	AGRN						12	88356996	G	intergenic	LINC02258(dist=157470),C12orf50(dist=16818)
1	986286	T	intronic	AGRN						12	88357717	G	intergenic	LINC02258(dist=158191),C12orf50(dist=16097)
1	986732	A	exonic	AGRN						12	88357828	G	intergenic	LINC02258(dist=158302),C12orf50(dist=15986)
1	988016	C	intronic	AGRN						12	88359256	A	intergenic	LINC02258(dist=159730),C12orf50(dist=14558)
1	988902	A	intronic	AGRN						12	88360034	T	intergenic	LINC02258(dist=160508),C12orf50(dist=13780)
1	989461	A	intronic	AGRN						12	88360183	G	intergenic	LINC02258(dist=160657),C12orf50(dist=13631)
1	990943	C	UTR3	AGRN(NM_001305275:c.*582C>0,NM_198576:c.*582C>0,NM_001364727:c.*582C>0)						12	88360430	T	intergenic	LINC02258(dist=160904),C12orf50(dist=13384)
1	991723	A	downstream	AGRN(dist=229)						12	88360545	G	intergenic	LINC02258(dist=161019),C12orf50(dist=13269)
1	991904	T	downstream	AGRN(dist=410)						12	88360833	C	intergenic	LINC02258(dist=161307),C12orf50(dist=12981)
1	992511	G	intergenic	AGRN(dist=1017),LOC100288175(dist=2603)						12	88361276	C	intergenic	LINC02258(dist=161750),C12orf50(dist=12538)
1	993028	A	intergenic	AGRN(dist=1534),LOC100288175(dist=2086)						12	88361357	T	intergenic	LINC02258(dist=161831),C12orf50(dist=12457)
1	995271	G	ncRNA_intronic	LOC100288175						12	88362392	C	intergenic	LINC02258(dist=162866),C12orf50(dist=11422)
1	997012	A	ncRNA_intronic	LOC100288175						12	88362792	T	intergenic	LINC02258(dist=163266),C12orf50(dist=11022)
1	999128	A	ncRNA_intronic	LOC100288175						12	88365854	G	intergenic	LINC02258(dist=166328),C12orf50(dist=7960)
1	1002831	A	downstream	LOC100288175(dist=998)						12	88367604	C	intergenic	LINC02258(dist=168078),C12orf50(dist=6210)
1	1003968	A	intergenic	LOC100288175(dist=2135),RNF223(dist=2379)						12	88369281	T	intergenic	LINC02258(dist=169755),C12orf50(dist=4533)
1	1004331	T	intergenic	LOC100288175(dist=2498),RNF223(dist=2016)						12	88369496	C	intergenic	LINC02258(dist=169970),C12orf50(dist=4318)
1	1007255	C	exonic	RNF223						12	88370847	G	intergenic	LINC02258(dist=171321),C12orf50(dist=2967)
1	1010118	A	upstream	RNF223(dist=432)						12	88371178	A	intergenic	LINC02258(dist=171652),C12orf50(dist=2636)
1	1010259	A	upstream	RNF223(dist=573)						12	88371266	A	intergenic	LINC02258(dist=171740),C12orf50(dist=2548)
1	1011499	A	intergenic	RNF223(dist=1813),C1orf159(dist=5704)						12	88372363	G	intergenic	LINC02258(dist=172837),C12orf50(dist=1451)
1	1016029	G	intergenic	RNF223(dist=6343),C1orf159(dist=1174)						12	88373081	A	downstream	C12orf50(dist=733)
1	1018000	T	UTR3	C1orf159(NM_001363525:c.*273A>0,NM_017891:c.*273A>0,NM_001330306:c.*273A>0)						12	88373570	C	downstream	C12orf50(dist=244)
1	1018598	G	intronic	C1orf159						12	88374259	T	intronic	C12orf50
1	1019841	A	intronic	C1orf159						12	88375262	C	intronic	C12orf50
1	1020688	A	intronic	C1orf159						12	88375488	G	intronic	C12orf50
1	1022154	G	intronic	C1orf159						12	88376153	T	intronic	C12orf50
1	1022423	A	intronic	C1orf159						12	88376533	C	intronic	C12orf50
1	1024362	A	intronic	C1orf159						12	88376602	A	intronic	C12orf50
1	1026913	T	exonic	C1orf159						12	88376671	A	intronic	C12orf50
1	1027545	A	intronic	C1orf159						12	88378048	T	intronic	C12orf50
1	1032774	T	intronic	C1orf159						12	88378489	A	intronic	C12orf50
1	1036264	A	intronic	C1orf159						12	88378627	C	intronic	C12orf50
1	1036817	C	intronic	C1orf159						12	88378879	A	intronic	C12orf50
1	1037047	T	intronic	C1orf159						12	88379520	A	intronic	C12orf50
1	1040418	T	intronic	C1orf159						12	88379752	C	exonic	C12orf50
1	1047981	A	intronic	C1orf159						12	88379788	T	exonic	C12orf50
1	1051556	A	upstream	C1orf159(dist=87)						12	88380094	C	exonic	C12orf50
1	1054432	T	intergenic	C1orf159(dist=2963),LINC01342(dist=17965)						12	88381270	G	intronic	C12orf50
1	1060174	T	intergenic	C1orf159(dist=8705),LINC01342(dist=12223)						12	88381506	C	intronic	C12orf50
1	1061794	G	intergenic	C1orf159(dist=10325),LINC01342(dist=10603)						12	88382433	T	intronic	C12orf50
1	1061848	G	intergenic	C1orf159(dist=10379),LINC01342(dist=10549)						12	88382519	A	intronic	C12orf50
1	1062570	T	intergenic	C1orf159(dist=11101),LINC01342(dist=9827)						12	88382879	A	intronic	C12orf50
1	1062638	C	intergenic	C1orf159(dist=11169),LINC01342(dist=9759)						12	88384245	G	intronic	C12orf50
1	1062836	T	intergenic	C1orf159(dist=11367),LINC01342(dist=9561)						12	88384440	T	intronic	C12orf50
1	1067092	T	intergenic	C1orf159(dist=15623),LINC01342(dist=5305)						12	88385522	C	intronic	C12orf50
1	1084972	A	intergenic	LINC01342(dist=5538),MIR200B(dist=17512)						12	88385705	T	intronic	C12orf50
1	1088197	A	intergenic	LINC01342(dist=8763),MIR200B(dist=14287)						12	88386078	C	intronic	C12orf50
1	1106700	A	intergenic	MIR429(dist=2233),TTLL10(dist=2586)						12	88387196	A	intronic	C12orf50
1	1107303	G	intergenic	MIR429(dist=2836),TTLL10(dist=1983)						12	88389804	T	intronic	C12orf50
1	1107305	C	intergenic	MIR429(dist=2838),TTLL10(dist=1981)						12	88390284	C	intronic	C12orf50
1	1107307	G	intergenic	MIR429(dist=2840),TTLL10(dist=1979)						12	88390721	A	intronic	C12orf50
1	1107842	C	intergenic	MIR429(dist=3375),TTLL10(dist=1444)						12	88391019	G	intronic	C12orf50
1	1108518	C	upstream	TTLL10(dist=768)						12	88391569	T	intronic	C12orf50
1	1108757	T	upstream	TTLL10(dist=529)						12	88391638	G	intronic	C12orf50
1	1108951	T	upstream	TTLL10(dist=335)						12	88391758	G	intronic	C12orf50
1	1109104	T	upstream	TTLL10(dist=182)						12	88392640	G	intronic	C12orf50
1	1109193	A	upstream	TTLL10(dist=93)						12	88392665	T	intronic	C12orf50
1	1109195	G	upstream	TTLL10(dist=91)						12	88393177	G	intronic	C12orf50
1	1109311	A	intronic	TTLL10						12	88393833	G	intronic	C12orf50
1	1109315	G	intronic	TTLL10						12	88394586	C	intronic	C12orf50
1	1109376	A	intronic	TTLL10						12	88394771	T	intronic	C12orf50
1	1109554	C	intronic	TTLL10						12	88394959	T	intronic	C12orf50
1	1109653	A	intronic	TTLL10						12	88395238	A	intronic	C12orf50
1	1109903	T	intronic	TTLL10						12	88395286	A	intronic	C12orf50
1	1109908	G	intronic	TTLL10						12	88395332	G	intronic	C12orf50
1	1109952	A	intronic	TTLL10						12	88396126	G	intronic	C12orf50
1	1109953	A	intronic	TTLL10						12	88396426	C	intronic	C12orf50
1	1109958	G	intronic	TTLL10						12	88396880	A	intronic	C12orf50
1	1110019	G	intronic	TTLL10						12	88397264	A	intronic	C12orf50
1	1110127	T	intronic	TTLL10						12	88397760	T	intronic	C12orf50
1	1110225	T	intronic	TTLL10						12	88398976	G	intronic	C12orf50
1	1110368	T	intronic	TTLL10						12	88399353	G	intronic	C12orf50
1	1110420	C	intronic	TTLL10						12	88400301	A	intronic	C12orf50
1	1111411	T	intronic	TTLL10						12	88401119	T	intronic	C12orf50
1	1111870	A	intronic	TTLL10						12	88401414	G	intronic	C12orf50
1	1111962	A	intronic	TTLL10						12	88401539	T	intronic	C12orf50
1	1111987	T	intronic	TTLL10						12	88401806	A	intronic	C12orf50
1	1112260	C	intronic	TTLL10						12	88404031	A	intronic	C12orf50
1	1112307	T	intronic	TTLL10						12	88404497	G	intronic	C12orf50
1	1112810	T	intronic	TTLL10						12	88405800	G	intronic	C12orf50
1	1113394	T	intronic	TTLL10						12	88405808	G	intronic	C12orf50
1	1113501	A	intronic	TTLL10						12	88405822	C	intronic	C12orf50
1	1114111	A	intronic	TTLL10						12	88406294	G	intronic	C12orf50
1	1114668	A	exonic	TTLL10						12	88406506	G	intronic	C12orf50
1	1115379	A	intronic	TTLL10						12	88408113	G	intronic	C12orf50
1	1115405	T	intronic	TTLL10						12	88408140	A	intronic	C12orf50
1	1115461	T	exonic	TTLL10						12	88408176	G	intronic	C12orf50
1	1115503	C	exonic	TTLL10						12	88408355	T	intronic	C12orf50
1	1115510	T	exonic	TTLL10						12	88408479	T	intronic	C12orf50
1	1115602	A	exonic	TTLL10						12	88410537	G	intronic	C12orf50
1	1116231	C	exonic	TTLL10						12	88410646	G	intronic	C12orf50
1	1117529	C	intronic	TTLL10						12	88410685	C	intronic	C12orf50
1	1117709	A	intronic	TTLL10						12	88410728	C	intronic	C12orf50
1	1118491	G	intronic	TTLL10						12	88410781	A	intronic	C12orf50
1	1118560	T	intronic	TTLL10						12	88412493	T	intronic	C12orf50
1	1118728	G	intronic	TTLL10						12	88412594	T	intronic	C12orf50
1	1119546	T	intronic	TTLL10						12	88414188	G	intronic	C12orf50
1	1119796	T	intronic	TTLL10						12	88414536	A	intronic	C12orf50
1	1119858	T	intronic	TTLL10						12	88414597	A	intronic	C12orf50
1	1120377	A	exonic	TTLL10						12	88415845	T	intronic	C12orf50
1	1120421	T	exonic	TTLL10						12	88416479	G	intronic	C12orf50
1	1120431	A	exonic	TTLL10						12	88416492	T	intronic	C12orf50
1	1120536	A	UTR3	TTLL10(NM_153254:c.*14A>0)						12	88416686	T	intronic	C12orf50
1	1120621	C	UTR3	TTLL10(NM_153254:c.*99C>0)						12	88417032	A	intronic	C12orf50
1	1120821	T	UTR3	TTLL10(NM_153254:c.*299T>0)						12	88418104	A	intronic	C12orf50
1	1122233	G	intronic	TTLL10						12	88418390	A	intronic	C12orf50
1	1124134	A	intronic	TTLL10						12	88418445	C	intronic	C12orf50
1	1124343	T	intronic	TTLL10						12	88419961	T	intronic	C12orf50
1	1124639	A	intronic	TTLL10						12	88422997	G	intronic	C12orf50
1	1124974	T	intronic	TTLL10						12	88424552	C	intergenic	C12orf50(dist=1374),C12orf29(dist=4761)
1	1125423	T	intronic	TTLL10						12	88424612	G	intergenic	C12orf50(dist=1434),C12orf29(dist=4701)
1	1125774	G	intronic	TTLL10						12	88425581	A	intergenic	C12orf50(dist=2403),C12orf29(dist=3732)
1	1126087	T	intronic	TTLL10						12	88425957	A	intergenic	C12orf50(dist=2779),C12orf29(dist=3356)
1	1126298	T	intronic	TTLL10						12	88429030	C	upstream	C12orf29(dist=283)
1	1126417	A	intronic	TTLL10						12	88429070	C	upstream	C12orf29(dist=243)
1	1126806	A	intronic	TTLL10						12	88436262	A	intronic	C12orf29
1	1127010	A	intronic	TTLL10						12	88437179	A	intronic	C12orf29
1	1127561	C	intronic	TTLL10						12	88438631	G	intronic	C12orf29
1	1127600	T	intronic	TTLL10						12	88441146	G	intronic	C12orf29
1	1129005	T	intronic	TTLL10						12	88443213	G	UTR3	C12orf29(NM_001009894:c.*1014G>0)
1	1129032	G	intronic	TTLL10						12	88445889	C	intronic	CEP290
1	1130114	T	intronic	TTLL10						12	88447561	C	intronic	CEP290
1	1130200	A	intronic	TTLL10						12	88449110	T	intronic	CEP290
1	1130311	C	intronic	TTLL10						12	88454728	G	exonic	CEP290
1	1130590	A	intronic	TTLL10						12	88455802	T	intronic	CEP290
1	1130660	T	intronic	TTLL10						12	88457307	T	intronic	CEP290
1	1131147	A	intronic	TTLL10						12	88458146	G	intronic	CEP290
1	1131503	C	intronic	TTLL10						12	88458565	C	intronic	CEP290
1	1133502	T	downstream	TTLL10(dist=189)						12	88467487	C	intronic	CEP290
1	1133930	G	downstream	TTLL10(dist=617)						12	88469527	A	intronic	CEP290
1	1134053	A	downstream	TTLL10(dist=740)						12	88470018	C	intronic	CEP290
1	1135107	T	intergenic	TTLL10(dist=1794),TNFRSF18(dist=3781)						12	88470286	T	intronic	CEP290
1	1135108	G	intergenic	TTLL10(dist=1795),TNFRSF18(dist=3780)						12	88470974	G	intronic	CEP290
1	1135651	T	intergenic	TTLL10(dist=2338),TNFRSF18(dist=3237)						12	88472996	T	exonic	CEP290
1	1136855	A	intergenic	TTLL10(dist=3542),TNFRSF18(dist=2033)						12	88473307	G	intronic	CEP290
1	1138913	C	UTR3	TNFRSF18(NM_004195:c.*311G>0,NM_148901:c.*58G>0,NM_148902:c.*311G>0)						12	88477988	C	intronic	CEP290
1	1139202	C	exonic	TNFRSF18						12	88478049	A	intronic	CEP290
1	1139498	T	exonic	TNFRSF18						12	88480887	C	intronic	CEP290
1	1139862	C	exonic	TNFRSF18						12	88481632	C	exonic	CEP290
1	1140290	C	intronic	TNFRSF18						12	88483999	C	intronic	CEP290
1	1140504	C	intronic	TNFRSF18						12	88484318	T	intronic	CEP290
1	1140855	T	exonic	TNFRSF18						12	88485454	T	intronic	CEP290
1	1141387	T	intronic	TNFRSF18						12	88490119	T	intronic	CEP290
1	1141491	G	intronic	TNFRSF18						12	88494718	C	intronic	CEP290
1	1141723	G	intronic	TNFRSF18						12	88496410	G	intronic	CEP290
1	1142150	A	upstream	TNFRSF18(dist=178)						12	88496626	T	exonic	CEP290
1	1143104	T	intergenic	TNFRSF18(dist=1132),TNFRSF4(dist=3616)						12	88497118	C	intronic	CEP290
1	1143418	C	intergenic	TNFRSF18(dist=1446),TNFRSF4(dist=3302)						12	88499668	A	intronic	CEP290
1	1143451	G	intergenic	TNFRSF18(dist=1479),TNFRSF4(dist=3269)						12	88499707	C	intronic	CEP290
1	1143568	A	intergenic	TNFRSF18(dist=1596),TNFRSF4(dist=3152)						12	88500847	C	exonic	CEP290
1	1143657	G	intergenic	TNFRSF18(dist=1685),TNFRSF4(dist=3063)						12	88502995	C	intronic	CEP290
1	1144058	T	intergenic	TNFRSF18(dist=2086),TNFRSF4(dist=2662)						12	88503251	C	intronic	CEP290
1	1144122	C	intergenic	TNFRSF18(dist=2150),TNFRSF4(dist=2598)						12	88504260	G	intronic	CEP290
1	1144196	C	intergenic	TNFRSF18(dist=2224),TNFRSF4(dist=2524)						12	88505336	A	intronic	CEP290
1	1144616	C	intergenic	TNFRSF18(dist=2644),TNFRSF4(dist=2104)						12	88508258	C	exonic	CEP290
1	1144653	A	intergenic	TNFRSF18(dist=2681),TNFRSF4(dist=2067)						12	88511378	C	intronic	CEP290
1	1144696	C	intergenic	TNFRSF18(dist=2724),TNFRSF4(dist=2024)						12	88513562	G	intronic	CEP290
1	1144832	G	intergenic	TNFRSF18(dist=2860),TNFRSF4(dist=1888)						12	88514835	C	exonic	CEP290
1	1145411	A	intergenic	TNFRSF18(dist=3439),TNFRSF4(dist=1309)						12	88515862	A	intronic	CEP290
1	1145441	G	intergenic	TNFRSF18(dist=3469),TNFRSF4(dist=1279)						12	88516482	A	intronic	CEP290
1	1145467	G	intergenic	TNFRSF18(dist=3495),TNFRSF4(dist=1253)						12	88516609	G	intronic	CEP290
1	1145766	G	downstream	TNFRSF4(dist=954)						12	88517364	C	intronic	CEP290
1	1146276	T	downstream	TNFRSF4(dist=444)						12	88517620	C	intronic	CEP290
1	1146785	C	UTR3	TNFRSF4(NM_003327:c.*150G>0)						12	88518346	C	intronic	CEP290
1	1146853	A	UTR3	TNFRSF4(NM_003327:c.*82T>0)						12	88519120	C	exonic	CEP290
1	1147243	C	intronic	TNFRSF4						12	88519133	T	exonic	CEP290
1	1147297	A	intronic	TNFRSF4						12	88519346	C	intronic	CEP290
1	1147462	G	exonic	TNFRSF4						12	88519610	C	intronic	CEP290
1	1147562	A	intronic	TNFRSF4						12	88523494	G	exonic	CEP290
1	1147770	A	intronic	TNFRSF4						12	88523769	C	intronic	CEP290
1	1148278	T	intronic	TNFRSF4						12	88523977	C	intronic	CEP290
1	1148445	A	exonic	TNFRSF4						12	88524611	A	intronic	CEP290
1	1148821	A	intronic	TNFRSF4						12	88525014	T	intronic	CEP290
1	1149222	G	intronic	TNFRSF4						12	88525080	A	intronic	CEP290
1	1149762	A	upstream	TNFRSF4(dist=229)						12	88526812	T	intronic	CEP290
1	1150037	C	upstream	TNFRSF4(dist=504)						12	88529016	C	intronic	CEP290
1	1150181	C	upstream	TNFRSF4(dist=648)						12	88529442	T	intronic	CEP290
1	1150438	T	upstream	TNFRSF4(dist=905)						12	88531207	A	intronic	CEP290
1	1150448	C	upstream	TNFRSF4(dist=915)						12	88531236	C	intronic	CEP290
1	1150764	A	intergenic	TNFRSF4(dist=1231),SDF4(dist=1524)						12	88531471	T	intronic	CEP290
1	1151232	C	intergenic	TNFRSF4(dist=1699),SDF4(dist=1056)						12	88532886	C	intronic	CEP290
1	1151300	T	downstream	SDF4(dist=988)						12	88536290	G	intronic	TMTC3
1	1151679	A	downstream	SDF4(dist=609)						12	88538932	C	intronic	TMTC3
1	1151917	A	downstream	SDF4(dist=371)						12	88539043	G	intronic	TMTC3
1	1151973	C	downstream	SDF4(dist=315)						12	88541595	G	intronic	TMTC3
1	1152080	C	downstream	SDF4(dist=208)						12	88543780	G	intronic	TMTC3
1	1152601	G	UTR3	SDF4(NM_016547:c.*449C>0,NM_016176:c.*291C>0)						12	88546982	A	intronic	TMTC3
1	1152631	A	UTR3	SDF4(NM_016547:c.*419T>0,NM_016176:c.*261T>0)						12	88547360	G	intronic	TMTC3
1	1152731	A	UTR3	SDF4(NM_016547:c.*319T>0,NM_016176:c.*161T>0)						12	88552657	T	intronic	TMTC3
1	1153113	A	exonic	SDF4						12	88552817	A	intronic	TMTC3
1	1153455	A	intronic	SDF4						12	88555491	G	intronic	TMTC3
1	1154539	A	intronic	SDF4						12	88558554	T	intronic	TMTC3
1	1154858	T	intronic	SDF4						12	88561048	A	intronic	TMTC3
1	1155321	T	intronic	SDF4						12	88562844	C	intronic	TMTC3
1	1155685	C	intronic	SDF4						12	88565137	T	intronic	TMTC3
1	1156655	A	intronic	SDF4						12	88567593	C	intronic	TMTC3
1	1156735	C	intronic	SDF4						12	88567945	A	intronic	TMTC3
1	1157340	G	intronic	SDF4						12	88572105	A	intronic	TMTC3
1	1157372	A	intronic	SDF4						12	88574381	A	intronic	TMTC3
1	1157547	C	intronic	SDF4						12	88577903	T	intronic	TMTC3
1	1157564	A	intronic	SDF4						12	88578282	A	intronic	TMTC3
1	1157625	T	intronic	SDF4						12	88579548	C	intronic	TMTC3
1	1157631	A	intronic	SDF4						12	88579885	G	intronic	TMTC3
1	1157684	T	intronic	SDF4						12	88580274	G	intronic	TMTC3
1	1157705	G	intronic	SDF4						12	88589107	A	exonic	TMTC3
1	1157834	T	intronic	SDF4						12	88590014	G	UTR3	TMTC3(NM_001366583:c.*588G>0,NM_181783:c.*588G>0,NM_001366580:c.*588G>0,NM_001366574:c.*588G>0,NM_001366579:c.*588G>0)
1	1157862	T	intronic	SDF4						12	88592965	G	UTR3	TMTC3(NM_001366583:c.*3539G>0,NM_181783:c.*3539G>0,NM_001366580:c.*3539G>0,NM_001366574:c.*3539G>0,NM_001366579:c.*3539G>0)
1	1157974	G	intronic	SDF4						12	88597671	C	intergenic	TMTC3(dist=4007),KITLG(dist=288899)
1	1157991	A	intronic	SDF4						12	88598463	A	intergenic	TMTC3(dist=4799),KITLG(dist=288107)
1	1158020	C	intronic	SDF4						12	88600762	C	intergenic	TMTC3(dist=7098),KITLG(dist=285808)
1	1158277	A	intronic	SDF4						12	88604872	A	intergenic	TMTC3(dist=11208),KITLG(dist=281698)
1	1158326	A	intronic	SDF4						12	88608100	G	intergenic	TMTC3(dist=14436),KITLG(dist=278470)
1	1158357	G	intronic	SDF4						12	88609508	G	intergenic	TMTC3(dist=15844),KITLG(dist=277062)
1	1158948	G	intronic	SDF4						12	88614437	T	intergenic	TMTC3(dist=20773),KITLG(dist=272133)
1	1158973	T	intronic	SDF4						12	88616088	C	intergenic	TMTC3(dist=22424),KITLG(dist=270482)
1	1158975	C	intronic	SDF4						12	88617313	T	intergenic	TMTC3(dist=23649),KITLG(dist=269257)
1	1159020	G	intronic	SDF4						12	88619704	T	intergenic	TMTC3(dist=26040),KITLG(dist=266866)
1	1159024	T	intronic	SDF4						12	88624881	T	intergenic	TMTC3(dist=31217),KITLG(dist=261689)
1	1159062	C	intronic	SDF4						12	88627477	C	intergenic	TMTC3(dist=33813),KITLG(dist=259093)
1	1159107	A	intronic	SDF4						12	88632665	T	intergenic	TMTC3(dist=39001),KITLG(dist=253905)
1	1159485	T	intronic	SDF4						12	88635200	G	intergenic	TMTC3(dist=41536),KITLG(dist=251370)
1	1159540	A	intronic	SDF4						12	88639690	T	intergenic	TMTC3(dist=46026),KITLG(dist=246880)
1	1159729	G	intronic	SDF4						12	88655812	T	intergenic	TMTC3(dist=62148),KITLG(dist=230758)
1	1160163	A	intronic	SDF4						12	88665870	T	intergenic	TMTC3(dist=72206),KITLG(dist=220700)
1	1160224	T	intronic	SDF4						12	88666258	G	intergenic	TMTC3(dist=72594),KITLG(dist=220312)
1	1160226	G	intronic	SDF4						12	88666364	A	intergenic	TMTC3(dist=72700),KITLG(dist=220206)
1	1160245	T	intronic	SDF4						12	88669071	C	intergenic	TMTC3(dist=75407),KITLG(dist=217499)
1	1160267	G	intronic	SDF4						12	88671589	A	intergenic	TMTC3(dist=77925),KITLG(dist=214981)
1	1160665	A	intronic	SDF4						12	88672379	G	intergenic	TMTC3(dist=78715),KITLG(dist=214191)
1	1160809	C	intronic	SDF4						12	88673874	C	intergenic	TMTC3(dist=80210),KITLG(dist=212696)
1	1160856	C	intronic	SDF4						12	88673960	A	intergenic	TMTC3(dist=80296),KITLG(dist=212610)
1	1161362	G	intronic	SDF4						12	88675386	A	intergenic	TMTC3(dist=81722),KITLG(dist=211184)
1	1161393	T	intronic	SDF4						12	88675445	A	intergenic	TMTC3(dist=81781),KITLG(dist=211125)
1	1161641	A	intronic	SDF4						12	88675664	A	intergenic	TMTC3(dist=82000),KITLG(dist=210906)
1	1161780	T	intronic	SDF4						12	88676542	C	intergenic	TMTC3(dist=82878),KITLG(dist=210028)
1	1161866	T	intronic	SDF4						12	88678801	G	intergenic	TMTC3(dist=85137),KITLG(dist=207769)
1	1162208	A	intronic	SDF4						12	88679245	A	intergenic	TMTC3(dist=85581),KITLG(dist=207325)
1	1162272	T	intronic	SDF4						12	88683971	G	intergenic	TMTC3(dist=90307),KITLG(dist=202599)
1	1162281	A	intronic	SDF4						12	88685759	G	intergenic	TMTC3(dist=92095),KITLG(dist=200811)
1	1162316	T	intronic	SDF4						12	88687703	A	intergenic	TMTC3(dist=94039),KITLG(dist=198867)
1	1162435	A	intronic	SDF4						12	88687802	C	intergenic	TMTC3(dist=94138),KITLG(dist=198768)
1	1162541	C	intronic	SDF4						12	88690940	A	intergenic	TMTC3(dist=97276),KITLG(dist=195630)
1	1163065	A	intronic	SDF4						12	88692954	T	intergenic	TMTC3(dist=99290),KITLG(dist=193616)
1	1163172	C	intronic	SDF4						12	88693061	G	intergenic	TMTC3(dist=99397),KITLG(dist=193509)
1	1163266	A	intronic	SDF4						12	88696966	T	intergenic	TMTC3(dist=103302),KITLG(dist=189604)
1	1163355	C	intronic	SDF4						12	88697605	G	intergenic	TMTC3(dist=103941),KITLG(dist=188965)
1	1163449	C	intronic	SDF4						12	88699198	G	intergenic	TMTC3(dist=105534),KITLG(dist=187372)
1	1163474	G	intronic	SDF4						12	88700576	G	intergenic	TMTC3(dist=106912),KITLG(dist=185994)
1	1163764	T	intronic	SDF4						12	88701563	G	intergenic	TMTC3(dist=107899),KITLG(dist=185007)
1	1163804	T	intronic	SDF4						12	88702187	G	intergenic	TMTC3(dist=108523),KITLG(dist=184383)
1	1163964	A	exonic	SDF4						12	88704035	T	intergenic	TMTC3(dist=110371),KITLG(dist=182535)
1	1164538	T	intronic	SDF4						12	88704290	G	intergenic	TMTC3(dist=110626),KITLG(dist=182280)
1	1164540	T	intronic	SDF4						12	88704610	A	intergenic	TMTC3(dist=110946),KITLG(dist=181960)
1	1164624	G	intronic	SDF4						12	88705203	G	intergenic	TMTC3(dist=111539),KITLG(dist=181367)
1	1164628	T	intronic	SDF4						12	88706759	A	intergenic	TMTC3(dist=113095),KITLG(dist=179811)
1	1164687	C	intronic	SDF4						12	88707316	T	intergenic	TMTC3(dist=113652),KITLG(dist=179254)
1	1165310	A	intronic	SDF4						12	88709379	T	intergenic	TMTC3(dist=115715),KITLG(dist=177191)
1	1165361	G	intronic	SDF4						12	88710150	T	intergenic	TMTC3(dist=116486),KITLG(dist=176420)
1	1165471	C	intronic	SDF4						12	88715166	T	intergenic	TMTC3(dist=121502),KITLG(dist=171404)
1	1165522	A	intronic	SDF4						12	88715806	T	intergenic	TMTC3(dist=122142),KITLG(dist=170764)
1	1165725	G	intronic	SDF4						12	88716331	C	intergenic	TMTC3(dist=122667),KITLG(dist=170239)
1	1165821	C	intronic	SDF4						12	88716340	C	intergenic	TMTC3(dist=122676),KITLG(dist=170230)
1	1165957	A	intronic	SDF4						12	88721466	A	intergenic	TMTC3(dist=127802),KITLG(dist=165104)
1	1166075	A	intronic	SDF4						12	88723469	T	intergenic	TMTC3(dist=129805),KITLG(dist=163101)
1	1166177	C	intronic	SDF4						12	88733088	A	intergenic	TMTC3(dist=139424),KITLG(dist=153482)
1	1166205	T	intronic	SDF4						12	88735172	T	intergenic	TMTC3(dist=141508),KITLG(dist=151398)
1	1166887	C	intronic	SDF4						12	88738380	C	intergenic	TMTC3(dist=144716),KITLG(dist=148190)
1	1168180	C	exonic	B3GALT6						12	88739478	T	intergenic	TMTC3(dist=145814),KITLG(dist=147092)
1	1168843	T	UTR3	B3GALT6(NM_080605:c.*195T>0)						12	88740864	T	intergenic	TMTC3(dist=147200),KITLG(dist=145706)
1	1169094	C	UTR3	B3GALT6(NM_080605:c.*446C>0)						12	88742522	A	intergenic	TMTC3(dist=148858),KITLG(dist=144048)
1	1169415	G	UTR3	B3GALT6(NM_080605:c.*767G>0)						12	88752621	C	intergenic	TMTC3(dist=158957),KITLG(dist=133949)
1	1169485	A	UTR3	B3GALT6(NM_080605:c.*837A>0)						12	88752754	G	intergenic	TMTC3(dist=159090),KITLG(dist=133816)
1	1169728	T	UTR3	B3GALT6(NM_080605:c.*1080T>0)						12	88753177	T	intergenic	TMTC3(dist=159513),KITLG(dist=133393)
1	1169755	A	UTR3	B3GALT6(NM_080605:c.*1107A>0)						12	88753802	T	intergenic	TMTC3(dist=160138),KITLG(dist=132768)
1	1169973	A	UTR3	B3GALT6(NM_080605:c.*1325A>0)						12	88756601	T	intergenic	TMTC3(dist=162937),KITLG(dist=129969)
1	1170148	T	UTR3	B3GALT6(NM_080605:c.*1500T>0)						12	88759313	A	intergenic	TMTC3(dist=165649),KITLG(dist=127257)
1	1170682	A	downstream	B3GALT6(dist=262)						12	88762096	A	intergenic	TMTC3(dist=168432),KITLG(dist=124474)
1	1170729	A	downstream	B3GALT6(dist=309)						12	88765040	A	intergenic	TMTC3(dist=171376),KITLG(dist=121530)
1	1170982	A	downstream	B3GALT6(dist=562)						12	88766417	A	intergenic	TMTC3(dist=172753),KITLG(dist=120153)
1	1171022	C	downstream	B3GALT6(dist=602)						12	88776999	C	intergenic	TMTC3(dist=183335),KITLG(dist=109571)
1	1171100	G	downstream	B3GALT6(dist=680)						12	88783649	C	intergenic	TMTC3(dist=189985),KITLG(dist=102921)
1	1171153	T	downstream	B3GALT6(dist=733)						12	88790241	G	intergenic	TMTC3(dist=196577),KITLG(dist=96329)
1	1171249	C	downstream	B3GALT6(dist=829)						12	88790492	A	intergenic	TMTC3(dist=196828),KITLG(dist=96078)
1	1171377	G	downstream	B3GALT6(dist=957)						12	88794779	A	intergenic	TMTC3(dist=201115),KITLG(dist=91791)
1	1171683	G	intergenic	B3GALT6(dist=1263),C1QTNF12(dist=6150)						12	88812520	T	intergenic	TMTC3(dist=218856),KITLG(dist=74050)
1	1171836	T	intergenic	B3GALT6(dist=1416),C1QTNF12(dist=5997)						12	88814987	G	intergenic	TMTC3(dist=221323),KITLG(dist=71583)
1	1172106	G	intergenic	B3GALT6(dist=1686),C1QTNF12(dist=5727)						12	88816923	T	intergenic	TMTC3(dist=223259),KITLG(dist=69647)
1	1173132	T	intergenic	B3GALT6(dist=2712),C1QTNF12(dist=4701)						12	88817882	T	intergenic	TMTC3(dist=224218),KITLG(dist=68688)
1	1173235	A	intergenic	B3GALT6(dist=2815),C1QTNF12(dist=4598)						12	88819792	A	intergenic	TMTC3(dist=226128),KITLG(dist=66778)
1	1173611	A	intergenic	B3GALT6(dist=3191),C1QTNF12(dist=4222)						12	88820440	A	intergenic	TMTC3(dist=226776),KITLG(dist=66130)
1	1174114	G	intergenic	B3GALT6(dist=3694),C1QTNF12(dist=3719)						12	88821166	C	intergenic	TMTC3(dist=227502),KITLG(dist=65404)
1	1174263	A	intergenic	B3GALT6(dist=3843),C1QTNF12(dist=3570)						12	88821775	A	intergenic	TMTC3(dist=228111),KITLG(dist=64795)
1	1174425	G	intergenic	B3GALT6(dist=4005),C1QTNF12(dist=3408)						12	88825604	T	intergenic	TMTC3(dist=231940),KITLG(dist=60966)
1	1174954	C	intergenic	B3GALT6(dist=4534),C1QTNF12(dist=2879)						12	88826935	A	intergenic	TMTC3(dist=233271),KITLG(dist=59635)
1	1175305	A	intergenic	B3GALT6(dist=4885),C1QTNF12(dist=2528)						12	88826978	A	intergenic	TMTC3(dist=233314),KITLG(dist=59592)
1	1175308	A	intergenic	B3GALT6(dist=4888),C1QTNF12(dist=2525)						12	88827853	A	intergenic	TMTC3(dist=234189),KITLG(dist=58717)
1	1175747	G	intergenic	B3GALT6(dist=5327),C1QTNF12(dist=2086)						12	88827943	T	intergenic	TMTC3(dist=234279),KITLG(dist=58627)
1	1175770	A	intergenic	B3GALT6(dist=5350),C1QTNF12(dist=2063)						12	88828442	A	intergenic	TMTC3(dist=234778),KITLG(dist=58128)
1	1176212	T	intergenic	B3GALT6(dist=5792),C1QTNF12(dist=1621)						12	88829058	G	intergenic	TMTC3(dist=235394),KITLG(dist=57512)
1	1176227	T	intergenic	B3GALT6(dist=5807),C1QTNF12(dist=1606)						12	88829519	G	intergenic	TMTC3(dist=235855),KITLG(dist=57051)
1	1176433	G	intergenic	B3GALT6(dist=6013),C1QTNF12(dist=1400)						12	88830335	C	intergenic	TMTC3(dist=236671),KITLG(dist=56235)
1	1176597	C	intergenic	B3GALT6(dist=6177),C1QTNF12(dist=1236)						12	88830508	T	intergenic	TMTC3(dist=236844),KITLG(dist=56062)
1	1177019	C	downstream	C1QTNF12(dist=814)						12	88830972	C	intergenic	TMTC3(dist=237308),KITLG(dist=55598)
1	1177211	C	downstream	C1QTNF12(dist=622)						12	88831503	T	intergenic	TMTC3(dist=237839),KITLG(dist=55067)
1	1177474	G	downstream	C1QTNF12(dist=359)						12	88831679	C	intergenic	TMTC3(dist=238015),KITLG(dist=54891)
1	1177630	G	downstream	C1QTNF12(dist=203)						12	88832290	G	intergenic	TMTC3(dist=238626),KITLG(dist=54280)
1	1177893	T	UTR3	C1QTNF12(NM_001014980:c.*35A>0)						12	88832724	A	intergenic	TMTC3(dist=239060),KITLG(dist=53846)
1	1178245	T	exonic	C1QTNF12						12	88832726	T	intergenic	TMTC3(dist=239062),KITLG(dist=53844)
1	1178482	G	exonic	C1QTNF12						12	88832818	A	intergenic	TMTC3(dist=239154),KITLG(dist=53752)
1	1178925	A	exonic	C1QTNF12						12	88833010	A	intergenic	TMTC3(dist=239346),KITLG(dist=53560)
1	1178961	T	intronic	C1QTNF12						12	88833914	C	intergenic	TMTC3(dist=240250),KITLG(dist=52656)
1	1179030	A	intronic	C1QTNF12						12	88834056	T	intergenic	TMTC3(dist=240392),KITLG(dist=52514)
1	1179309	A	intronic	C1QTNF12						12	88834895	T	intergenic	TMTC3(dist=241231),KITLG(dist=51675)
1	1179385	G	exonic	C1QTNF12						12	88835637	T	intergenic	TMTC3(dist=241973),KITLG(dist=50933)
1	1179532	T	intronic	C1QTNF12						12	88835684	T	intergenic	TMTC3(dist=242020),KITLG(dist=50886)
1	1179800	A	exonic	C1QTNF12						12	88836621	C	intergenic	TMTC3(dist=242957),KITLG(dist=49949)
1	1179983	A	intronic	C1QTNF12						12	88837231	G	intergenic	TMTC3(dist=243567),KITLG(dist=49339)
1	1180779	C	intronic	C1QTNF12						12	88837262	T	intergenic	TMTC3(dist=243598),KITLG(dist=49308)
1	1181751	C	intronic	C1QTNF12						12	88837425	G	intergenic	TMTC3(dist=243761),KITLG(dist=49145)
1	1182326	C	upstream	C1QTNF12(dist=224)						12	88837963	A	intergenic	TMTC3(dist=244299),KITLG(dist=48607)
1	1182529	G	upstream	C1QTNF12(dist=427)						12	88837979	T	intergenic	TMTC3(dist=244315),KITLG(dist=48591)
1	1182973	C	upstream	C1QTNF12(dist=871)						12	88838083	T	intergenic	TMTC3(dist=244419),KITLG(dist=48487)
1	1183397	T	intergenic	C1QTNF12(dist=1295),UBE2J2(dist=5895)						12	88838661	C	intergenic	TMTC3(dist=244997),KITLG(dist=47909)
1	1183521	C	intergenic	C1QTNF12(dist=1419),UBE2J2(dist=5771)						12	88838891	C	intergenic	TMTC3(dist=245227),KITLG(dist=47679)
1	1183598	G	intergenic	C1QTNF12(dist=1496),UBE2J2(dist=5694)						12	88839138	A	intergenic	TMTC3(dist=245474),KITLG(dist=47432)
1	1183858	T	intergenic	C1QTNF12(dist=1756),UBE2J2(dist=5434)						12	88839745	T	intergenic	TMTC3(dist=246081),KITLG(dist=46825)
1	1183865	T	intergenic	C1QTNF12(dist=1763),UBE2J2(dist=5427)						12	88840235	C	intergenic	TMTC3(dist=246571),KITLG(dist=46335)
1	1185260	G	intergenic	C1QTNF12(dist=3158),UBE2J2(dist=4032)						12	88840427	A	intergenic	TMTC3(dist=246763),KITLG(dist=46143)
1	1185413	T	intergenic	C1QTNF12(dist=3311),UBE2J2(dist=3879)						12	88840563	A	intergenic	TMTC3(dist=246899),KITLG(dist=46007)
1	1186022	A	intergenic	C1QTNF12(dist=3920),UBE2J2(dist=3270)						12	88841013	C	intergenic	TMTC3(dist=247349),KITLG(dist=45557)
1	1186155	T	intergenic	C1QTNF12(dist=4053),UBE2J2(dist=3137)						12	88841228	A	intergenic	TMTC3(dist=247564),KITLG(dist=45342)
1	1186502	T	intergenic	C1QTNF12(dist=4400),UBE2J2(dist=2790)						12	88841432	A	intergenic	TMTC3(dist=247768),KITLG(dist=45138)
1	1186665	A	intergenic	C1QTNF12(dist=4563),UBE2J2(dist=2627)						12	88841476	A	intergenic	TMTC3(dist=247812),KITLG(dist=45094)
1	1186665	A	intergenic	C1QTNF12(dist=4563),UBE2J2(dist=2627)						12	88841762	G	intergenic	TMTC3(dist=248098),KITLG(dist=44808)
1	1186821	T	intergenic	C1QTNF12(dist=4719),UBE2J2(dist=2471)						12	88842198	C	intergenic	TMTC3(dist=248534),KITLG(dist=44372)
1	1186998	A	intergenic	C1QTNF12(dist=4896),UBE2J2(dist=2294)						12	88842542	A	intergenic	TMTC3(dist=248878),KITLG(dist=44028)
1	1187448	A	intergenic	C1QTNF12(dist=5346),UBE2J2(dist=1844)						12	88842779	G	intergenic	TMTC3(dist=249115),KITLG(dist=43791)
1	1187641	T	intergenic	C1QTNF12(dist=5539),UBE2J2(dist=1651)						12	88842943	T	intergenic	TMTC3(dist=249279),KITLG(dist=43627)
1	1187867	A	intergenic	C1QTNF12(dist=5765),UBE2J2(dist=1425)						12	88843595	A	intergenic	TMTC3(dist=249931),KITLG(dist=42975)
1	1187993	G	intergenic	C1QTNF12(dist=5891),UBE2J2(dist=1299)						12	88843765	G	intergenic	TMTC3(dist=250101),KITLG(dist=42805)
1	1188225	T	intergenic	C1QTNF12(dist=6123),UBE2J2(dist=1067)						12	88843827	T	intergenic	TMTC3(dist=250163),KITLG(dist=42743)
1	1188306	A	downstream	UBE2J2(dist=986)						12	88844034	A	intergenic	TMTC3(dist=250370),KITLG(dist=42536)
1	1188944	G	downstream	UBE2J2(dist=348)						12	88844064	C	intergenic	TMTC3(dist=250400),KITLG(dist=42506)
1	1189552	T	UTR3	UBE2J2(NM_194458:c.*1031A>0,NM_194457:c.*1031A>0,NM_194315:c.*1031A>0,NM_058167:c.*1031A>0)						12	88845243	G	intergenic	TMTC3(dist=251579),KITLG(dist=41327)
1	1189663	A	UTR3	UBE2J2(NM_194458:c.*920T>0,NM_194457:c.*920T>0,NM_194315:c.*920T>0,NM_058167:c.*920T>0)						12	88845418	T	intergenic	TMTC3(dist=251754),KITLG(dist=41152)
1	1189924	T	UTR3	UBE2J2(NM_194458:c.*659A>0,NM_194457:c.*659A>0,NM_194315:c.*659A>0,NM_058167:c.*659A>0)						12	88846219	T	intergenic	TMTC3(dist=252555),KITLG(dist=40351)
1	1190061	G	UTR3	UBE2J2(NM_194458:c.*522C>0,NM_194457:c.*522C>0,NM_194315:c.*522C>0,NM_058167:c.*522C>0)						12	88846530	G	intergenic	TMTC3(dist=252866),KITLG(dist=40040)
1	1190166	A	UTR3	UBE2J2(NM_194458:c.*417T>0,NM_194457:c.*417T>0,NM_194315:c.*417T>0,NM_058167:c.*417T>0)						12	88847783	T	intergenic	TMTC3(dist=254119),KITLG(dist=38787)
1	1190206	A	UTR3	UBE2J2(NM_194458:c.*377T>0,NM_194457:c.*377T>0,NM_194315:c.*377T>0,NM_058167:c.*377T>0)						12	88850450	G	intergenic	TMTC3(dist=256786),KITLG(dist=36120)
1	1190207	T	UTR3	UBE2J2(NM_194458:c.*376A>0,NM_194457:c.*376A>0,NM_194315:c.*376A>0,NM_058167:c.*376A>0)						12	88851543	A	intergenic	TMTC3(dist=257879),KITLG(dist=35027)
1	1190523	T	UTR3	UBE2J2(NM_194458:c.*60A>0,NM_194457:c.*60A>0,NM_194315:c.*60A>0,NM_058167:c.*60A>0)						12	88851831	T	intergenic	TMTC3(dist=258167),KITLG(dist=34739)
1	1190685	A	exonic	UBE2J2						12	88852024	G	intergenic	TMTC3(dist=258360),KITLG(dist=34546)
1	1190990	T	intronic	UBE2J2						12	88854069	C	intergenic	TMTC3(dist=260405),KITLG(dist=32501)
1	1191870	T	intronic	UBE2J2						12	88856855	C	intergenic	TMTC3(dist=263191),KITLG(dist=29715)
1	1192515	G	intronic	UBE2J2						12	88857518	T	intergenic	TMTC3(dist=263854),KITLG(dist=29052)
1	1192963	A	intronic	UBE2J2						12	88857537	T	intergenic	TMTC3(dist=263873),KITLG(dist=29033)
1	1193432	G	intronic	UBE2J2						12	88857932	C	intergenic	TMTC3(dist=264268),KITLG(dist=28638)
1	1193476	C	intronic	UBE2J2						12	88860136	C	intergenic	TMTC3(dist=266472),KITLG(dist=26434)
1	1193713	G	intronic	UBE2J2						12	88860549	C	intergenic	TMTC3(dist=266885),KITLG(dist=26021)
1	1193723	C	intronic	UBE2J2						12	88861051	A	intergenic	TMTC3(dist=267387),KITLG(dist=25519)
1	1193852	C	intronic	UBE2J2						12	88861090	T	intergenic	TMTC3(dist=267426),KITLG(dist=25480)
1	1194537	T	intronic	UBE2J2						12	88861791	T	intergenic	TMTC3(dist=268127),KITLG(dist=24779)
1	1194545	T	intronic	UBE2J2						12	88865006	T	intergenic	TMTC3(dist=271342),KITLG(dist=21564)
1	1194638	T	intronic	UBE2J2						12	88865241	C	intergenic	TMTC3(dist=271577),KITLG(dist=21329)
1	1194804	C	intronic	UBE2J2						12	88867696	A	intergenic	TMTC3(dist=274032),KITLG(dist=18874)
1	1195593	A	intronic	UBE2J2						12	88868577	C	intergenic	TMTC3(dist=274913),KITLG(dist=17993)
1	1195657	A	intronic	UBE2J2						12	88869494	A	intergenic	TMTC3(dist=275830),KITLG(dist=17076)
1	1195690	C	intronic	UBE2J2						12	88869805	G	intergenic	TMTC3(dist=276141),KITLG(dist=16765)
1	1195820	C	intronic	UBE2J2						12	88872707	G	intergenic	TMTC3(dist=279043),KITLG(dist=13863)
1	1196374	T	intronic	UBE2J2						12	88873306	G	intergenic	TMTC3(dist=279642),KITLG(dist=13264)
1	1197398	T	intronic	UBE2J2						12	88873694	A	intergenic	TMTC3(dist=280030),KITLG(dist=12876)
1	1197489	G	intronic	UBE2J2						12	88874179	T	intergenic	TMTC3(dist=280515),KITLG(dist=12391)
1	1197541	G	intronic	UBE2J2						12	88874406	C	intergenic	TMTC3(dist=280742),KITLG(dist=12164)
1	1197698	C	intronic	UBE2J2						12	88878938	T	intergenic	TMTC3(dist=285274),KITLG(dist=7632)
1	1197867	A	intronic	UBE2J2						12	88879394	A	intergenic	TMTC3(dist=285730),KITLG(dist=7176)
1	1198347	T	intronic	UBE2J2						12	88879761	A	intergenic	TMTC3(dist=286097),KITLG(dist=6809)
1	1198578	T	intronic	UBE2J2						12	88881379	A	intergenic	TMTC3(dist=287715),KITLG(dist=5191)
1	1198618	A	intronic	UBE2J2						12	88882203	A	intergenic	TMTC3(dist=288539),KITLG(dist=4367)
1	1199207	C	intronic	UBE2J2						12	88883415	G	intergenic	TMTC3(dist=289751),KITLG(dist=3155)
1	1199573	G	intronic	UBE2J2						12	88886963	C	UTR3	KITLG(NM_000899:c.*4033G>0,NM_003994:c.*4033G>0)
1	1200192	G	exonic	UBE2J2						12	88887724	T	UTR3	KITLG(NM_000899:c.*3272A>0,NM_003994:c.*3272A>0)
1	1200202	T	exonic	UBE2J2						12	88887891	C	UTR3	KITLG(NM_000899:c.*3105G>0,NM_003994:c.*3105G>0)
1	1201640	C	intronic	UBE2J2						12	88888215	C	UTR3	KITLG(NM_000899:c.*2781G>0,NM_003994:c.*2781G>0)
1	1202437	T	intronic	UBE2J2						12	88890581	G	UTR3	KITLG(NM_000899:c.*415C>0,NM_003994:c.*415C>0)
1	1202471	A	intronic	UBE2J2						12	88890671	A	UTR3	KITLG(NM_000899:c.*325T>0,NM_003994:c.*325T>0)
1	1203271	A	exonic	UBE2J2						12	88891228	T	intronic	KITLG
1	1203387	A	intronic	UBE2J2						12	88891453	T	intronic	KITLG
1	1203464	A	intronic	UBE2J2						12	88891776	A	intronic	KITLG
1	1203516	A	intronic	UBE2J2						12	88893259	A	intronic	KITLG
1	1203938	C	intronic	UBE2J2						12	88894495	G	intronic	KITLG
1	1204354	A	intronic	UBE2J2						12	88898641	T	intronic	KITLG
1	1205155	C	intronic	UBE2J2						12	88900246	T	intronic	KITLG
1	1205231	A	intronic	UBE2J2						12	88900891	A	exonic	KITLG
1	1205336	C	intronic	UBE2J2						12	88904556	C	intronic	KITLG
1	1206158	T	intronic	UBE2J2						12	88904764	T	intronic	KITLG
1	1206343	A	intronic	UBE2J2						12	88909178	C	intronic	KITLG
1	1206619	A	intronic	UBE2J2						12	88910307	T	intronic	KITLG
1	1206861	C	intronic	UBE2J2						12	88911022	C	intronic	KITLG
1	1207215	G	intronic	UBE2J2						12	88913417	G	intronic	KITLG
1	1207230	C	intronic	UBE2J2						12	88913604	T	intronic	KITLG
1	1208058	C	intronic	UBE2J2						12	88916046	T	intronic	KITLG
1	1208195	C	intronic	UBE2J2						12	88918440	C	intronic	KITLG
1	1209439	T	upstream	UBE2J2(dist=205)						12	88918583	C	intronic	KITLG
1	1209482	A	upstream	UBE2J2(dist=248)						12	88918627	T	intronic	KITLG
1	1209539	A	upstream	UBE2J2(dist=305)						12	88918733	T	intronic	KITLG
1	1209636	G	upstream	UBE2J2(dist=402)						12	88918849	G	intronic	KITLG
1	1210300	G	intergenic	UBE2J2(dist=1066),SCNN1D(dist=5516)						12	88919032	A	intronic	KITLG
1	1210333	T	intergenic	UBE2J2(dist=1099),SCNN1D(dist=5483)						12	88919054	C	intronic	KITLG
1	1210352	G	intergenic	UBE2J2(dist=1118),SCNN1D(dist=5464)						12	88919319	G	intronic	KITLG
1	1210360	T	intergenic	UBE2J2(dist=1126),SCNN1D(dist=5456)						12	88919483	C	intronic	KITLG
1	1210435	G	intergenic	UBE2J2(dist=1201),SCNN1D(dist=5381)						12	88920019	G	intronic	KITLG
1	1210468	T	intergenic	UBE2J2(dist=1234),SCNN1D(dist=5348)						12	88920691	G	intronic	KITLG
1	1210471	C	intergenic	UBE2J2(dist=1237),SCNN1D(dist=5345)						12	88920759	C	intronic	KITLG
1	1210744	A	intergenic	UBE2J2(dist=1510),SCNN1D(dist=5072)						12	88920864	A	intronic	KITLG
1	1210848	A	intergenic	UBE2J2(dist=1614),SCNN1D(dist=4968)						12	88920954	T	intronic	KITLG
1	1210963	C	intergenic	UBE2J2(dist=1729),SCNN1D(dist=4853)						12	88921117	G	intronic	KITLG
1	1211287	T	intergenic	UBE2J2(dist=2053),SCNN1D(dist=4529)						12	88921216	G	intronic	KITLG
1	1211292	T	intergenic	UBE2J2(dist=2058),SCNN1D(dist=4524)						12	88921317	T	intronic	KITLG
1	1211330	C	intergenic	UBE2J2(dist=2096),SCNN1D(dist=4486)						12	88921386	T	intronic	KITLG
1	1211927	T	intergenic	UBE2J2(dist=2693),SCNN1D(dist=3889)						12	88921394	A	intronic	KITLG
1	1212612	T	intergenic	UBE2J2(dist=3378),SCNN1D(dist=3204)						12	88921417	C	intronic	KITLG
1	1212649	C	intergenic	UBE2J2(dist=3415),SCNN1D(dist=3167)						12	88921961	T	intronic	KITLG
1	1212795	A	intergenic	UBE2J2(dist=3561),SCNN1D(dist=3021)						12	88922866	T	intronic	KITLG
1	1213013	A	intergenic	UBE2J2(dist=3779),SCNN1D(dist=2803)						12	88922974	T	intronic	KITLG
1	1213126	T	intergenic	UBE2J2(dist=3892),SCNN1D(dist=2690)						12	88924020	T	intronic	KITLG
1	1213402	G	intergenic	UBE2J2(dist=4168),SCNN1D(dist=2414)						12	88924128	A	intronic	KITLG
1	1213930	C	intergenic	UBE2J2(dist=4696),SCNN1D(dist=1886)						12	88924491	G	intronic	KITLG
1	1213936	A	intergenic	UBE2J2(dist=4702),SCNN1D(dist=1880)						12	88924752	A	intronic	KITLG
1	1214153	A	intergenic	UBE2J2(dist=4919),SCNN1D(dist=1663)						12	88924790	C	intronic	KITLG
1	1214413	T	intergenic	UBE2J2(dist=5179),SCNN1D(dist=1403)						12	88925072	C	intronic	KITLG
1	1214414	G	intergenic	UBE2J2(dist=5180),SCNN1D(dist=1402)						12	88925213	C	intronic	KITLG
1	1214542	A	intergenic	UBE2J2(dist=5308),SCNN1D(dist=1274)						12	88925437	C	intronic	KITLG
1	1214678	T	intergenic	UBE2J2(dist=5444),SCNN1D(dist=1138)						12	88925596	T	intronic	KITLG
1	1215074	G	upstream	SCNN1D(dist=742)						12	88926072	T	intronic	KITLG
1	1215078	G	upstream	SCNN1D(dist=738)						12	88926233	A	exonic	KITLG
1	1215260	C	upstream	SCNN1D(dist=556)						12	88926787	T	intronic	KITLG
1	1215262	C	upstream	SCNN1D(dist=554)						12	88927315	C	intronic	KITLG
1	1215404	C	upstream	SCNN1D(dist=412)						12	88929026	C	intronic	KITLG
1	1215712	T	upstream	SCNN1D(dist=104)						12	88929348	C	intronic	KITLG
1	1215722	G	upstream	SCNN1D(dist=94)						12	88930078	C	intronic	KITLG
1	1215796	G	upstream	SCNN1D(dist=20)						12	88930726	C	intronic	KITLG
1	1215849	T	UTR5	SCNN1D(NM_001130413:c.-193T>0)						12	88931532	C	intronic	KITLG
1	1215851	T	UTR5	SCNN1D(NM_001130413:c.-191T>0)						12	88931882	G	intronic	KITLG
1	1216195	A	intronic	SCNN1D						12	88932035	A	intronic	KITLG
1	1216258	A	intronic	SCNN1D						12	88932246	T	intronic	KITLG
1	1216581	C	intronic	SCNN1D						12	88932364	C	intronic	KITLG
1	1217011	C	intronic	SCNN1D						12	88932724	C	intronic	KITLG
1	1217020	C	intronic	SCNN1D						12	88932804	G	intronic	KITLG
1	1217058	A	intronic	SCNN1D						12	88933341	A	intronic	KITLG
1	1217258	C	intronic	SCNN1D						12	88933469	C	intronic	KITLG
1	1218086	T	intronic	SCNN1D						12	88935237	G	intronic	KITLG
1	1218334	A	intronic	SCNN1D						12	88936077	A	intronic	KITLG
1	1218655	T	intronic	SCNN1D						12	88937724	T	intronic	KITLG
1	1218794	T	intronic	SCNN1D						12	88937794	A	intronic	KITLG
1	1218852	T	intronic	SCNN1D						12	88937977	A	intronic	KITLG
1	1218890	C	intronic	SCNN1D						12	88938562	G	intronic	KITLG
1	1219456	C	exonic	SCNN1D						12	88938877	T	intronic	KITLG
1	1219775	T	intronic	SCNN1D						12	88939075	T	intronic	KITLG
1	1219941	A	intronic	SCNN1D						12	88939761	T	intronic	KITLG
1	1220136	G	intronic	SCNN1D						12	88940506	A	intronic	KITLG
1	1220425	G	intronic	SCNN1D						12	88941011	C	intronic	KITLG
1	1220504	A	intronic	SCNN1D						12	88941142	A	intronic	KITLG
1	1220954	A	exonic	SCNN1D						12	88941214	T	intronic	KITLG
1	1221001	G	exonic	SCNN1D						12	88941604	A	intronic	KITLG
1	1221138	A	intronic	SCNN1D						12	88941623	C	intronic	KITLG
1	1221717	T	intronic	SCNN1D						12	88941650	T	intronic	KITLG
1	1221912	C	intronic	SCNN1D						12	88941803	C	intronic	KITLG
1	1222051	G	intronic	SCNN1D						12	88942980	A	intronic	KITLG
1	1222267	C	exonic	SCNN1D						12	88943003	T	intronic	KITLG
1	1222657	A	exonic	SCNN1D						12	88943149	C	intronic	KITLG
1	1222958	T	exonic	SCNN1D						12	88943793	C	intronic	KITLG
1	1222996	T	intronic	SCNN1D						12	88943799	T	intronic	KITLG
1	1223376	C	exonic	SCNN1D						12	88948703	C	intronic	KITLG
1	1223385	C	exonic	SCNN1D						12	88948861	C	intronic	KITLG
1	1223570	T	intronic	SCNN1D						12	88950027	C	intronic	KITLG
1	1225899	A	exonic	SCNN1D						12	88950073	T	intronic	KITLG
1	1225959	G	intronic	SCNN1D						12	88950651	A	intronic	KITLG
1	1226031	G	exonic	SCNN1D						12	88953561	C	intronic	KITLG
1	1226063	A	exonic	SCNN1D						12	88953959	G	intronic	KITLG
1	1226102	A	intronic	SCNN1D						12	88957352	C	intronic	KITLG
1	1226231	A	intronic	SCNN1D						12	88962365	T	intronic	KITLG
1	1226348	G	intronic	SCNN1D						12	88962681	C	intronic	KITLG
1	1226419	A	intronic	SCNN1D						12	88967857	T	intronic	KITLG
1	1226512	A	exonic	SCNN1D						12	88977118	T	intergenic	KITLG(dist=2868),LINC02458(dist=427785)
1	1226651	C	exonic	SCNN1D						12	88978557	A	intergenic	KITLG(dist=4307),LINC02458(dist=426346)
1	1226690	T	exonic	SCNN1D						12	88980649	G	intergenic	KITLG(dist=6399),LINC02458(dist=424254)
1	1226757	A	exonic	SCNN1D						12	88983866	G	intergenic	KITLG(dist=9616),LINC02458(dist=421037)
1	1226889	A	exonic	SCNN1D						12	88984336	G	intergenic	KITLG(dist=10086),LINC02458(dist=420567)
1	1227196	G	UTR3	SCNN1D(NM_001130413:c.*206G>0)						12	88986016	A	intergenic	KITLG(dist=11766),LINC02458(dist=418887)
1	1227244	A	UTR3	SCNN1D(NM_001130413:c.*254A>0)						12	88986900	C	intergenic	KITLG(dist=12650),LINC02458(dist=418003)
1	1227249	C	UTR3	SCNN1D(NM_001130413:c.*259C>0)						12	88989749	G	intergenic	KITLG(dist=15499),LINC02458(dist=415154)
1	1228326	T	UTR3	ACAP3(NM_030649:c.*618A>0)						12	88989961	G	intergenic	KITLG(dist=15711),LINC02458(dist=414942)
1	1230030	A	intronic	ACAP3						12	88992613	A	intergenic	KITLG(dist=18363),LINC02458(dist=412290)
1	1230408	C	intronic	ACAP3						12	88992806	T	intergenic	KITLG(dist=18556),LINC02458(dist=412097)
1	1230419	C	intronic	ACAP3						12	88993932	C	intergenic	KITLG(dist=19682),LINC02458(dist=410971)
1	1230689	T	intronic	ACAP3						12	88996651	T	intergenic	KITLG(dist=22401),LINC02458(dist=408252)
1	1231208	T	exonic	ACAP3						12	88996942	A	intergenic	KITLG(dist=22692),LINC02458(dist=407961)
1	1231507	A	ncRNA_exonic	MIR6726						12	88997503	A	intergenic	KITLG(dist=23253),LINC02458(dist=407400)
1	1231656	A	exonic	ACAP3						12	88998146	G	intergenic	KITLG(dist=23896),LINC02458(dist=406757)
1	1231701	A	intronic	ACAP3						12	88998327	G	intergenic	KITLG(dist=24077),LINC02458(dist=406576)
1	1232004	A	exonic	ACAP3						12	88999066	G	intergenic	KITLG(dist=24816),LINC02458(dist=405837)
1	1232229	G	intronic	ACAP3						12	89000942	C	intergenic	KITLG(dist=26692),LINC02458(dist=403961)
1	1232233	A	intronic	ACAP3						12	89002172	T	intergenic	KITLG(dist=27922),LINC02458(dist=402731)
1	1232319	A	intronic	ACAP3						12	89003575	C	intergenic	KITLG(dist=29325),LINC02458(dist=401328)
1	1232474	T	intronic	ACAP3						12	89008364	T	intergenic	KITLG(dist=34114),LINC02458(dist=396539)
1	1232548	T	intronic	ACAP3						12	89008875	A	intergenic	KITLG(dist=34625),LINC02458(dist=396028)
1	1233112	T	intronic	ACAP3						12	89009649	G	intergenic	KITLG(dist=35399),LINC02458(dist=395254)
1	1233507	T	intronic	ACAP3						12	89012852	C	intergenic	KITLG(dist=38602),LINC02458(dist=392051)
1	1233941	C	intronic	ACAP3						12	89013142	C	intergenic	KITLG(dist=38892),LINC02458(dist=391761)
1	1234169	A	intronic	ACAP3						12	89013573	G	intergenic	KITLG(dist=39323),LINC02458(dist=391330)
1	1234554	C	intronic	ACAP3						12	89015138	A	intergenic	KITLG(dist=40888),LINC02458(dist=389765)
1	1235604	A	intronic	ACAP3						12	89015462	A	intergenic	KITLG(dist=41212),LINC02458(dist=389441)
1	1235710	A	intronic	ACAP3						12	89017149	C	intergenic	KITLG(dist=42899),LINC02458(dist=387754)
1	1236856	T	intronic	ACAP3						12	89021980	T	intergenic	KITLG(dist=47730),LINC02458(dist=382923)
1	1237036	C	intronic	ACAP3						12	89028897	G	intergenic	KITLG(dist=54647),LINC02458(dist=376006)
1	1237494	T	intronic	ACAP3						12	89039044	C	intergenic	KITLG(dist=64794),LINC02458(dist=365859)
1	1238583	A	exonic	ACAP3						12	89045260	G	intergenic	KITLG(dist=71010),LINC02458(dist=359643)
1	1238780	G	intronic	ACAP3						12	89046050	G	intergenic	KITLG(dist=71800),LINC02458(dist=358853)
1	1239221	G	intronic	ACAP3						12	89048510	C	intergenic	KITLG(dist=74260),LINC02458(dist=356393)
1	1239339	T	intronic	ACAP3						12	89072082	C	intergenic	KITLG(dist=97832),LINC02458(dist=332821)
1	1239592	A	intronic	ACAP3						12	89075259	A	intergenic	KITLG(dist=101009),LINC02458(dist=329644)
1	1239708	G	intronic	ACAP3						12	89083261	C	intergenic	KITLG(dist=109011),LINC02458(dist=321642)
1	1239847	T	intronic	ACAP3						12	89089001	T	intergenic	KITLG(dist=114751),LINC02458(dist=315902)
1	1240192	A	ncRNA_exonic	SNORD167						12	89120544	T	intergenic	KITLG(dist=146294),LINC02458(dist=284359)
1	1240237	G	intronic	ACAP3						12	89160012	T	intergenic	KITLG(dist=185762),LINC02458(dist=244891)
1	1240503	A	intronic	ACAP3						12	89160444	A	intergenic	KITLG(dist=186194),LINC02458(dist=244459)
1	1241280	T	intronic	ACAP3						12	89160580	G	intergenic	KITLG(dist=186330),LINC02458(dist=244323)
1	1241746	C	intronic	ACAP3						12	89161879	A	intergenic	KITLG(dist=187629),LINC02458(dist=243024)
1	1241800	A	intronic	ACAP3						12	89163965	G	intergenic	KITLG(dist=189715),LINC02458(dist=240938)
1	1241903	C	intronic	ACAP3						12	89164083	C	intergenic	KITLG(dist=189833),LINC02458(dist=240820)
1	1242288	G	intronic	ACAP3						12	89165084	A	intergenic	KITLG(dist=190834),LINC02458(dist=239819)
1	1242707	A	intronic	ACAP3						12	89165155	T	intergenic	KITLG(dist=190905),LINC02458(dist=239748)
1	1242983	G	intronic	ACAP3						12	89165861	G	intergenic	KITLG(dist=191611),LINC02458(dist=239042)
1	1244386	A	intronic	PUSL1						12	89165954	C	intergenic	KITLG(dist=191704),LINC02458(dist=238949)
1	1245319	A	intronic	PUSL1						12	89166657	C	intergenic	KITLG(dist=192407),LINC02458(dist=238246)
1	1246319	A	exonic	PUSL1						12	89167297	G	intergenic	KITLG(dist=193047),LINC02458(dist=237606)
1	1246373	A	exonic	PUSL1						12	89169774	T	intergenic	KITLG(dist=195524),LINC02458(dist=235129)
1	1246390	G	exonic	PUSL1						12	89170905	C	intergenic	KITLG(dist=196655),LINC02458(dist=233998)
1	1246438	A	exonic	PUSL1						12	89170934	C	intergenic	KITLG(dist=196684),LINC02458(dist=233969)
1	1247626	A	exonic	INTS11						12	89171034	C	intergenic	KITLG(dist=196784),LINC02458(dist=233869)
1	1248329	A	exonic	INTS11						12	89171458	C	intergenic	KITLG(dist=197208),LINC02458(dist=233445)
1	1248561	T	intronic	INTS11						12	89171699	A	intergenic	KITLG(dist=197449),LINC02458(dist=233204)
1	1250957	A	exonic	INTS11						12	89172621	C	intergenic	KITLG(dist=198371),LINC02458(dist=232282)
1	1251077	T	intronic	INTS11						12	89172712	A	intergenic	KITLG(dist=198462),LINC02458(dist=232191)
1	1252027	A	intronic	INTS11						12	89172814	A	intergenic	KITLG(dist=198564),LINC02458(dist=232089)
1	1253128	A	intronic	INTS11						12	89174143	G	intergenic	KITLG(dist=199893),LINC02458(dist=230760)
1	1253265	A	intronic	INTS11						12	89174627	G	intergenic	KITLG(dist=200377),LINC02458(dist=230276)
1	1254136	G	intronic	INTS11						12	89175535	C	intergenic	KITLG(dist=201285),LINC02458(dist=229368)
1	1254255	A	intronic	INTS11						12	89176652	A	intergenic	KITLG(dist=202402),LINC02458(dist=228251)
1	1254443	G	intronic	INTS11						12	89177572	G	intergenic	KITLG(dist=203322),LINC02458(dist=227331)
1	1254841	C	exonic	INTS11						12	89178846	T	intergenic	KITLG(dist=204596),LINC02458(dist=226057)
1	1255002	A	intronic	INTS11						12	89178905	A	intergenic	KITLG(dist=204655),LINC02458(dist=225998)
1	1255107	A	intronic	INTS11						12	89179571	G	intergenic	KITLG(dist=205321),LINC02458(dist=225332)
1	1255251	C	intronic	INTS11						12	89179766	C	intergenic	KITLG(dist=205516),LINC02458(dist=225137)
1	1257371	G	intronic	INTS11						12	89180868	T	intergenic	KITLG(dist=206618),LINC02458(dist=224035)
1	1258246	A	intronic	INTS11						12	89181888	A	intergenic	KITLG(dist=207638),LINC02458(dist=223015)
1	1258818	A	intronic	INTS11						12	89182811	G	intergenic	KITLG(dist=208561),LINC02458(dist=222092)
1	1259731	G	intronic	INTS11						12	89183141	G	intergenic	KITLG(dist=208891),LINC02458(dist=221762)
1	1260168	C	upstream	CPTP,INTS11(dist=14)						12	89184738	G	intergenic	KITLG(dist=210488),LINC02458(dist=220165)
1	1260196	A	UTR5	CPTP(NM_001029885:c.-2095A>0)						12	89185788	G	intergenic	KITLG(dist=211538),LINC02458(dist=219115)
1	1260462	T	UTR5	CPTP(NM_001029885:c.-1829T>0)						12	89185845	C	intergenic	KITLG(dist=211595),LINC02458(dist=219058)
1	1261347	T	intronic	CPTP						12	89186178	T	intergenic	KITLG(dist=211928),LINC02458(dist=218725)
1	1261365	A	intronic	CPTP						12	89186551	A	intergenic	KITLG(dist=212301),LINC02458(dist=218352)
1	1261824	G	intronic	CPTP						12	89186564	C	intergenic	KITLG(dist=212314),LINC02458(dist=218339)
1	1262591	C	intronic	CPTP						12	89188647	C	intergenic	KITLG(dist=214397),LINC02458(dist=216256)
1	1262695	A	exonic	CPTP						12	89190382	T	intergenic	KITLG(dist=216132),LINC02458(dist=214521)
1	1262886	A	exonic	CPTP						12	89190799	C	intergenic	KITLG(dist=216549),LINC02458(dist=214104)
1	1262966	C	exonic	CPTP						12	89190884	A	intergenic	KITLG(dist=216634),LINC02458(dist=214019)
1	1263085	A	exonic	CPTP						12	89190983	C	intergenic	KITLG(dist=216733),LINC02458(dist=213920)
1	1263144	G	UTR3	CPTP(NM_001029885:c.*1G>0)						12	89191869	G	intergenic	KITLG(dist=217619),LINC02458(dist=213034)
1	1263362	G	UTR3	CPTP(NM_001029885:c.*219G>0)						12	89192021	C	intergenic	KITLG(dist=217771),LINC02458(dist=212882)
1	1264334	T	downstream	CPTP(dist=58)						12	89193163	T	intergenic	KITLG(dist=218913),LINC02458(dist=211740)
1	1264733	G	downstream	CPTP(dist=457)						12	89193336	C	intergenic	KITLG(dist=219086),LINC02458(dist=211567)
1	1264791	A	downstream	CPTP(dist=515)						12	89194217	T	intergenic	KITLG(dist=219967),LINC02458(dist=210686)
1	1264797	G	downstream	CPTP(dist=521)						12	89196882	C	intergenic	KITLG(dist=222632),LINC02458(dist=208021)
1	1265051	A	downstream	CPTP(dist=775)						12	89197645	G	intergenic	KITLG(dist=223395),LINC02458(dist=207258)
1	1265154	T	downstream	CPTP(dist=878)						12	89198983	G	intergenic	KITLG(dist=224733),LINC02458(dist=205920)
1	1265259	T	downstream	CPTP(dist=983)						12	89200595	G	intergenic	KITLG(dist=226345),LINC02458(dist=204308)
1	1265460	T	intergenic	CPTP(dist=1184),TAS1R3(dist=1200)						12	89201018	T	intergenic	KITLG(dist=226768),LINC02458(dist=203885)
1	1266425	A	upstream	TAS1R3(dist=235)						12	89201114	G	intergenic	KITLG(dist=226864),LINC02458(dist=203789)
1	1266505	T	upstream	TAS1R3(dist=155)						12	89201144	T	intergenic	KITLG(dist=226894),LINC02458(dist=203759)
1	1266931	T	intronic	TAS1R3						12	89202001	G	intergenic	KITLG(dist=227751),LINC02458(dist=202902)
1	1267285	T	exonic	TAS1R3						12	89203511	G	intergenic	KITLG(dist=229261),LINC02458(dist=201392)
1	1267651	A	exonic	TAS1R3						12	89203565	T	intergenic	KITLG(dist=229315),LINC02458(dist=201338)
1	1267870	T	exonic	TAS1R3						12	89204019	T	intergenic	KITLG(dist=229769),LINC02458(dist=200884)
1	1268159	T	exonic	TAS1R3						12	89204021	G	intergenic	KITLG(dist=229771),LINC02458(dist=200882)
1	1268195	A	intronic	TAS1R3						12	89204293	T	intergenic	KITLG(dist=230043),LINC02458(dist=200610)
1	1268388	A	exonic	TAS1R3						12	89204722	A	intergenic	KITLG(dist=230472),LINC02458(dist=200181)
1	1269004	T	exonic	TAS1R3						12	89204842	G	intergenic	KITLG(dist=230592),LINC02458(dist=200061)
1	1269503	G	exonic	TAS1R3						12	89205319	C	intergenic	KITLG(dist=231069),LINC02458(dist=199584)
1	1269554	T	exonic	TAS1R3						12	89206994	C	intergenic	KITLG(dist=232744),LINC02458(dist=197909)
1	1269888	A	UTR3	TAS1R3(NM_152228:c.*44A>0)						12	89207358	A	intergenic	KITLG(dist=233108),LINC02458(dist=197545)
1	1269914	T	UTR3	TAS1R3(NM_152228:c.*70T>0)						12	89207958	T	intergenic	KITLG(dist=233708),LINC02458(dist=196945)
1	1269986	A	UTR3	TAS1R3(NM_152228:c.*142A>0)						12	89208414	G	intergenic	KITLG(dist=234164),LINC02458(dist=196489)
1	1270049	G	UTR3	TAS1R3(NM_152228:c.*205G>0)						12	89208539	A	intergenic	KITLG(dist=234289),LINC02458(dist=196364)
1	1270132	A	UTR3	TAS1R3(NM_152228:c.*288A>0)						12	89209814	A	intergenic	KITLG(dist=235564),LINC02458(dist=195089)
1	1270251	T	UTR3	TAS1R3(NM_152228:c.*407T>0)						12	89210737	A	intergenic	KITLG(dist=236487),LINC02458(dist=194166)
1	1270453	T	UTR3	TAS1R3(NM_152228:c.*609T>0)						12	89213519	G	intergenic	KITLG(dist=239269),LINC02458(dist=191384)
1	1271942	T	intronic	DVL1						12	89213594	C	intergenic	KITLG(dist=239344),LINC02458(dist=191309)
1	1272045	A	intronic	DVL1						12	89217991	A	intergenic	KITLG(dist=243741),LINC02458(dist=186912)
1	1272072	T	intronic	DVL1						12	89218820	A	intergenic	KITLG(dist=244570),LINC02458(dist=186083)
1	1273116	A	intronic	DVL1						12	89221751	A	intergenic	KITLG(dist=247501),LINC02458(dist=183152)
1	1274350	A	intronic	DVL1						12	89222467	C	intergenic	KITLG(dist=248217),LINC02458(dist=182436)
1	1275716	A	intronic	DVL1						12	89223113	C	intergenic	KITLG(dist=248863),LINC02458(dist=181790)
1	1275730	A	intronic	DVL1						12	89223800	G	intergenic	KITLG(dist=249550),LINC02458(dist=181103)
1	1275956	T	intronic	DVL1						12	89224015	C	intergenic	KITLG(dist=249765),LINC02458(dist=180888)
1	1276322	T	intronic	DVL1						12	89224048	C	intergenic	KITLG(dist=249798),LINC02458(dist=180855)
1	1276410	C	intronic	DVL1						12	89224663	T	intergenic	KITLG(dist=250413),LINC02458(dist=180240)
1	1277649	T	intronic	DVL1						12	89225581	T	intergenic	KITLG(dist=251331),LINC02458(dist=179322)
1	1277735	A	intronic	DVL1						12	89229701	G	intergenic	KITLG(dist=255451),LINC02458(dist=175202)
1	1278047	A	intronic	DVL1						12	89230432	T	intergenic	KITLG(dist=256182),LINC02458(dist=174471)
1	1278592	A	intronic	DVL1						12	89230696	C	intergenic	KITLG(dist=256446),LINC02458(dist=174207)
1	1280014	A	intronic	DVL1						12	89230714	T	intergenic	KITLG(dist=256464),LINC02458(dist=174189)
1	1280492	T	intronic	DVL1						12	89230915	A	intergenic	KITLG(dist=256665),LINC02458(dist=173988)
1	1281345	C	intronic	DVL1						12	89231487	A	intergenic	KITLG(dist=257237),LINC02458(dist=173416)
1	1281506	A	intronic	DVL1						12	89233391	T	intergenic	KITLG(dist=259141),LINC02458(dist=171512)
1	1281833	T	intronic	DVL1						12	89235648	A	intergenic	KITLG(dist=261398),LINC02458(dist=169255)
1	1281839	A	intronic	DVL1						12	89236865	T	intergenic	KITLG(dist=262615),LINC02458(dist=168038)
1	1283173	T	intronic	DVL1						12	89238754	A	intergenic	KITLG(dist=264504),LINC02458(dist=166149)
1	1283418	C	intronic	DVL1						12	89244749	T	intergenic	KITLG(dist=270499),LINC02458(dist=160154)
1	1286897	G	intergenic	DVL1(dist=2099),MXRA8(dist=1172)						12	89248703	A	intergenic	KITLG(dist=274453),LINC02458(dist=156200)
1	1287055	A	intergenic	DVL1(dist=2257),MXRA8(dist=1014)						12	89248765	T	intergenic	KITLG(dist=274515),LINC02458(dist=156138)
1	1287127	G	downstream	MXRA8(dist=942)						12	89249585	A	intergenic	KITLG(dist=275335),LINC02458(dist=155318)
1	1287553	T	downstream	MXRA8(dist=516)						12	89251273	T	intergenic	KITLG(dist=277023),LINC02458(dist=153630)
1	1287562	A	downstream	MXRA8(dist=507)						12	89252061	C	intergenic	KITLG(dist=277811),LINC02458(dist=152842)
1	1287922	G	downstream	MXRA8(dist=147)						12	89253026	A	intergenic	KITLG(dist=278776),LINC02458(dist=151877)
1	1288471	C	UTR3	MXRA8(NM_001282584:c.*513G>0,NM_001282582:c.*513G>0,NM_001282585:c.*210G>0,NM_001282583:c.*513G>0,NM_032348:c.*513G>0)						12	89255080	A	intergenic	KITLG(dist=280830),LINC02458(dist=149823)
1	1288583	C	UTR3	MXRA8(NM_001282584:c.*401G>0,NM_001282582:c.*401G>0,NM_001282585:c.*98G>0,NM_001282583:c.*401G>0,NM_032348:c.*401G>0)						12	89255738	C	intergenic	KITLG(dist=281488),LINC02458(dist=149165)
1	1288823	A	UTR3	MXRA8(NM_001282584:c.*161T>0,NM_001282582:c.*161T>0,NM_001282583:c.*161T>0,NM_032348:c.*161T>0)						12	89256628	C	intergenic	KITLG(dist=282378),LINC02458(dist=148275)
1	1289446	T	exonic	MXRA8						12	89258174	T	intergenic	KITLG(dist=283924),LINC02458(dist=146729)
1	1289911	G	intronic	MXRA8						12	89258855	G	intergenic	KITLG(dist=284605),LINC02458(dist=146048)
1	1290015	A	intronic	MXRA8						12	89262076	T	intergenic	KITLG(dist=287826),LINC02458(dist=142827)
1	1291085	T	exonic	MXRA8						12	89262245	A	intergenic	KITLG(dist=287995),LINC02458(dist=142658)
1	1292426	C	intronic	MXRA8						12	89262485	C	intergenic	KITLG(dist=288235),LINC02458(dist=142418)
1	1292438	T	intronic	MXRA8						12	89264722	A	intergenic	KITLG(dist=290472),LINC02458(dist=140181)
1	1292626	T	intronic	MXRA8						12	89282911	A	intergenic	KITLG(dist=308661),LINC02458(dist=121992)
1	1292749	C	intronic	MXRA8						12	89299224	A	intergenic	KITLG(dist=324974),LINC02458(dist=105679)
1	1293343	C	intronic	MXRA8						12	89307261	G	intergenic	KITLG(dist=333011),LINC02458(dist=97642)
1	1293472	T	intronic	MXRA8						12	89310800	T	intergenic	KITLG(dist=336550),LINC02458(dist=94103)
1	1293948	T	UTR5	MXRA8(NM_001282584:c.-64A>0)						12	89328335	C	intergenic	KITLG(dist=354085),LINC02458(dist=76568)
1	1294287	C	intronic	MXRA8						12	89337474	T	intergenic	KITLG(dist=363224),LINC02458(dist=67429)
1	1294375	T	intronic	MXRA8						12	89490667	G	intergenic	LINC02458(dist=77198),DUSP6(dist=250347)
1	1294518	C	intronic	MXRA8						12	89511050	A	intergenic	LINC02458(dist=97581),DUSP6(dist=229964)
1	1294973	C	intronic	MXRA8						12	89622288	T	intergenic	LINC02458(dist=208819),DUSP6(dist=118726)
1	1295147	T	intronic	MXRA8						12	89653020	A	intergenic	LINC02458(dist=239551),DUSP6(dist=87994)
1	1295323	G	intronic	MXRA8						12	89660312	A	intergenic	LINC02458(dist=246843),DUSP6(dist=80702)
1	1295403	T	intronic	MXRA8						12	89663129	C	intergenic	LINC02458(dist=249660),DUSP6(dist=77885)
1	1295682	A	intronic	MXRA8						12	89676427	A	intergenic	LINC02458(dist=262958),DUSP6(dist=64587)
1	1296611	C	intronic	MXRA8						12	89678233	T	intergenic	LINC02458(dist=264764),DUSP6(dist=62781)
1	1297422	C	intronic	MXRA8						12	89678470	A	intergenic	LINC02458(dist=265001),DUSP6(dist=62544)
1	1298327	C	intronic	MXRA8						12	89721165	A	intergenic	LINC02458(dist=307696),DUSP6(dist=19849)
1	1298411	C	intronic	MXRA8						12	89724927	C	intergenic	LINC02458(dist=311458),DUSP6(dist=16087)
1	1298533	T	intronic	MXRA8						12	89726027	A	intergenic	LINC02458(dist=312558),DUSP6(dist=14987)
1	1298537	C	intronic	MXRA8						12	89727441	C	intergenic	LINC02458(dist=313972),DUSP6(dist=13573)
1	1299571	A	upstream	MXRA8(dist=650)						12	89728126	C	intergenic	LINC02458(dist=314657),DUSP6(dist=12888)
1	1299603	A	upstream	MXRA8(dist=682)						12	89735898	T	intergenic	LINC02458(dist=322429),DUSP6(dist=5116)
1	1300303	G	intergenic	MXRA8(dist=1382),AURKAIP1(dist=8813)						12	89740864	C	downstream	DUSP6(dist=150)
1	1300347	T	intergenic	MXRA8(dist=1426),AURKAIP1(dist=8769)						12	89741438	G	UTR3	DUSP6(NM_022652:c.*1593C>0,NM_001946:c.*1593C>0)
1	1301642	G	intergenic	MXRA8(dist=2721),AURKAIP1(dist=7474)						12	89741711	A	UTR3	DUSP6(NM_022652:c.*1320T>0,NM_001946:c.*1320T>0)
1	1301981	T	intergenic	MXRA8(dist=3060),AURKAIP1(dist=7135)						12	89741904	A	UTR3	DUSP6(NM_022652:c.*1127T>0,NM_001946:c.*1127T>0)
1	1302878	C	intergenic	MXRA8(dist=3957),AURKAIP1(dist=6238)						12	89742731	C	UTR3	DUSP6(NM_022652:c.*300G>0,NM_001946:c.*300G>0)
1	1303741	A	intergenic	MXRA8(dist=4820),AURKAIP1(dist=5375)						12	89743589	A	intronic	DUSP6
1	1305719	A	intergenic	MXRA8(dist=6798),AURKAIP1(dist=3397)						12	89743614	G	intronic	DUSP6
1	1308160	A	downstream	AURKAIP1(dist=956)						12	89743921	A	intronic	DUSP6
1	1308274	A	downstream	AURKAIP1(dist=842)						12	89744246	G	intronic	DUSP6
1	1308308	A	downstream	AURKAIP1(dist=808)						12	89744773	C	exonic	DUSP6
1	1309185	C	exonic	AURKAIP1						12	89744826	G	intronic	DUSP6
1	1309405	C	exonic	AURKAIP1						12	89745477	C	exonic	DUSP6
1	1310181	G	intronic	AURKAIP1						12	89745557	A	exonic	DUSP6
1	1310291	A	intronic	AURKAIP1						12	89747875	T	intergenic	DUSP6(dist=1597),POC1B(dist=65623)
1	1310647	T	upstream	AURKAIP1(dist=60)						12	89749223	C	intergenic	DUSP6(dist=2945),POC1B(dist=64275)
1	1310668	A	upstream	AURKAIP1(dist=81)						12	89750025	C	intergenic	DUSP6(dist=3747),POC1B(dist=63473)
1	1310769	T	upstream	AURKAIP1(dist=182)						12	89751085	T	intergenic	DUSP6(dist=4807),POC1B(dist=62413)
1	1310821	T	upstream	AURKAIP1(dist=234)						12	89751641	G	intergenic	DUSP6(dist=5363),POC1B(dist=61857)
1	1310824	C	upstream	AURKAIP1(dist=237)						12	89752349	T	intergenic	DUSP6(dist=6071),POC1B(dist=61149)
1	1311168	C	upstream	AURKAIP1(dist=581)						12	89752904	C	intergenic	DUSP6(dist=6626),POC1B(dist=60594)
1	1311472	G	upstream	AURKAIP1(dist=885)						12	89753047	C	intergenic	DUSP6(dist=6769),POC1B(dist=60451)
1	1311716	G	intergenic	AURKAIP1(dist=1129),CCNL2(dist=9375)						12	89753450	A	intergenic	DUSP6(dist=7172),POC1B(dist=60048)
1	1313931	T	intergenic	AURKAIP1(dist=3344),CCNL2(dist=7160)						12	89753901	T	intergenic	DUSP6(dist=7623),POC1B(dist=59597)
1	1316887	A	intergenic	AURKAIP1(dist=6300),CCNL2(dist=4204)						12	89754726	G	intergenic	DUSP6(dist=8448),POC1B(dist=58772)
1	1319869	C	intergenic	AURKAIP1(dist=9282),CCNL2(dist=1222)						12	89764942	A	intergenic	DUSP6(dist=18664),POC1B(dist=48556)
1	1320069	T	intergenic	AURKAIP1(dist=9482),CCNL2(dist=1022)						12	89765885	G	intergenic	DUSP6(dist=19607),POC1B(dist=47613)
1	1320105	C	downstream	CCNL2(dist=986)						12	89767198	C	intergenic	DUSP6(dist=20920),POC1B(dist=46300)
1	1320435	A	downstream	CCNL2(dist=656)						12	89767237	G	intergenic	DUSP6(dist=20959),POC1B(dist=46261)
1	1320591	C	downstream	CCNL2(dist=500)						12	89774286	A	intergenic	DUSP6(dist=28008),POC1B(dist=39212)
1	1320616	T	downstream	CCNL2(dist=475)						12	89775593	T	intergenic	DUSP6(dist=29315),POC1B(dist=37905)
1	1321090	T	downstream	CCNL2(dist=1)						12	89777311	G	intergenic	DUSP6(dist=31033),POC1B(dist=36187)
1	1322268	A	UTR3	CCNL2(NM_001350497:c.*343T>0,NM_001320155:c.*343T>0,NM_001350499:c.*343T>0,NM_001320153:c.*343T>0,NM_001350498:c.*343T>0,NM_030937:c.*343T>0,NM_001350500:c.*343T>0)						12	89787787	C	intergenic	DUSP6(dist=41509),POC1B(dist=25711)
1	1323030	A	intronic	CCNL2						12	89817213	A	intronic	POC1B
1	1325295	A	intronic	CCNL2						12	89819166	T	intronic	POC1B
1	1327493	T	intronic	CCNL2						12	89825925	C	intronic	POC1B
1	1328971	T	intronic	CCNL2						12	89826293	C	intronic	POC1B
1	1329895	T	intronic	CCNL2						12	89828141	A	intronic	POC1B
1	1330018	C	intronic	CCNL2						12	89828591	G	intronic	POC1B
1	1330426	A	intronic	CCNL2						12	89829470	T	intronic	POC1B
1	1330430	A	intronic	CCNL2						12	89830440	C	intronic	POC1B
1	1331833	C	intronic	CCNL2						12	89830523	G	intronic	POC1B
1	1332112	G	intronic	CCNL2						12	89830720	C	intronic	POC1B
1	1332452	A	intronic	CCNL2						12	89830870	T	intronic	POC1B
1	1332825	A	intronic	CCNL2						12	89833338	C	intronic	POC1B
1	1333713	C	exonic	CCNL2						12	89834113	T	intronic	POC1B
1	1333951	C	intronic	CCNL2						12	89834428	A	intronic	POC1B
1	1334475	C	exonic	CCNL2						12	89835728	A	intronic	POC1B
1	1334519	C	exonic	CCNL2						12	89835859	G	intronic	POC1B
1	1334931	T	ncRNA_exonic	MRPL20-AS1						12	89835926	A	intronic	POC1B
1	1335218	A	ncRNA_intronic	MRPL20-AS1						12	89836672	C	intronic	POC1B
1	1335302	T	ncRNA_intronic	MRPL20-AS1						12	89839072	T	intronic	POC1B
1	1335863	T	ncRNA_intronic	MRPL20-AS1						12	89839242	T	intronic	POC1B
1	1336478	A	ncRNA_exonic	MRPL20-AS1						12	89842053	C	intronic	POC1B
1	1336482	C	ncRNA_exonic	MRPL20-AS1						12	89844237	T	intronic	POC1B
1	1336626	A	ncRNA_exonic	MRPL20-AS1						12	89846230	T	intronic	POC1B
1	1336678	A	ncRNA_exonic	MRPL20-AS1						12	89846476	A	intronic	POC1B
1	1337220	A	ncRNA_exonic	MRPL20-AS1						12	89851166	T	intronic	POC1B
1	1338280	G	intronic	MRPL20						12	89857611	T	intronic	POC1B
1	1338324	T	intronic	MRPL20						12	89860319	A	intronic	POC1B
1	1338596	T	intronic	MRPL20						12	89861529	C	intronic	POC1B
1	1338858	A	intronic	MRPL20						12	89862030	T	intronic	POC1B
1	1339288	G	intronic	MRPL20						12	89867041	T	intronic	POC1B
1	1339465	G	intronic	MRPL20						12	89867747	T	intronic	POC1B
1	1339609	G	intronic	MRPL20						12	89869324	G	intronic	POC1B
1	1339724	T	intronic	MRPL20						12	89871493	T	intronic	POC1B
1	1339727	T	intronic	MRPL20						12	89871613	A	intronic	POC1B
1	1340126	A	intronic	MRPL20						12	89872932	T	intronic	POC1B
1	1340211	C	intronic	MRPL20						12	89873338	C	intronic	POC1B
1	1340696	C	intronic	MRPL20						12	89876143	C	intronic	POC1B
1	1341185	G	intronic	MRPL20						12	89876923	T	intronic	POC1B
1	1343135	A	upstream	MRPL20(dist=462)						12	89877363	A	intronic	POC1B
1	1343255	A	upstream	MRPL20(dist=582)						12	89877943	G	intronic	POC1B
1	1343666	A	upstream	MRPL20(dist=993)						12	89880129	A	intronic	POC1B
1	1344067	C	intergenic	MRPL20(dist=1394),ANKRD65(dist=9733)						12	89881564	G	intronic	POC1B
1	1344190	T	intergenic	MRPL20(dist=1517),ANKRD65(dist=9610)						12	89884278	T	intronic	POC1B
1	1344539	G	intergenic	MRPL20(dist=1866),ANKRD65(dist=9261)						12	89884294	A	intronic	POC1B
1	1344589	T	intergenic	MRPL20(dist=1916),ANKRD65(dist=9211)						12	89885266	T	intronic	POC1B
1	1344686	G	intergenic	MRPL20(dist=2013),ANKRD65(dist=9114)						12	89885923	A	intronic	POC1B
1	1344727	A	intergenic	MRPL20(dist=2054),ANKRD65(dist=9073)						12	89885942	C	intronic	POC1B
1	1344761	C	intergenic	MRPL20(dist=2088),ANKRD65(dist=9039)						12	89886348	C	intronic	POC1B
1	1345003	C	intergenic	MRPL20(dist=2330),ANKRD65(dist=8797)						12	89886578	A	intronic	POC1B
1	1346257	G	intergenic	MRPL20(dist=3584),ANKRD65(dist=7543)						12	89887649	C	intronic	POC1B
1	1346576	G	intergenic	MRPL20(dist=3903),ANKRD65(dist=7224)						12	89891366	A	intronic	POC1B
1	1346905	A	intergenic	MRPL20(dist=4232),ANKRD65(dist=6895)						12	89891474	G	intronic	POC1B
1	1346972	C	intergenic	MRPL20(dist=4299),ANKRD65(dist=6828)						12	89897161	G	intronic	POC1B
1	1347309	C	intergenic	MRPL20(dist=4636),ANKRD65(dist=6491)						12	89902604	A	intronic	POC1B
1	1347333	A	intergenic	MRPL20(dist=4660),ANKRD65(dist=6467)						12	89903215	C	intronic	POC1B
1	1347559	T	intergenic	MRPL20(dist=4886),ANKRD65(dist=6241)						12	89903654	C	intronic	POC1B
1	1348003	G	intergenic	MRPL20(dist=5330),ANKRD65(dist=5797)						12	89907166	C	intronic	POC1B
1	1348786	A	intergenic	MRPL20(dist=6113),ANKRD65(dist=5014)						12	89909835	C	intronic	POC1B
1	1349278	C	intergenic	MRPL20(dist=6605),ANKRD65(dist=4522)						12	89909850	C	intronic	POC1B
1	1349739	A	intergenic	MRPL20(dist=7066),ANKRD65(dist=4061)						12	89910827	A	intronic	POC1B
1	1350391	G	intergenic	MRPL20(dist=7718),ANKRD65(dist=3409)						12	89913419	T	UTR3	GALNT4(NM_003774:c.*3171A>0),POC1B-GALNT4(NM_001199781:c.*3171A>0,NM_001199782:c.*3171A>0)
1	1350601	T	intergenic	MRPL20(dist=7928),ANKRD65(dist=3199)						12	89913633	C	UTR3	GALNT4(NM_003774:c.*2957G>0),POC1B-GALNT4(NM_001199781:c.*2957G>0,NM_001199782:c.*2957G>0)
1	1350753	T	intergenic	MRPL20(dist=8080),ANKRD65(dist=3047)						12	89914261	C	UTR3	GALNT4(NM_003774:c.*2329G>0),POC1B-GALNT4(NM_001199781:c.*2329G>0,NM_001199782:c.*2329G>0)
1	1350765	C	intergenic	MRPL20(dist=8092),ANKRD65(dist=3035)						12	89916781	T	exonic	GALNT4,POC1B-GALNT4
1	1350935	T	intergenic	MRPL20(dist=8262),ANKRD65(dist=2865)						12	89916811	T	exonic	GALNT4,POC1B-GALNT4
1	1351039	C	intergenic	MRPL20(dist=8366),ANKRD65(dist=2761)						12	89917037	A	exonic	GALNT4,POC1B-GALNT4
1	1351172	T	intergenic	MRPL20(dist=8499),ANKRD65(dist=2628)						12	89917518	A	exonic	GALNT4,POC1B-GALNT4
1	1351356	A	intergenic	MRPL20(dist=8683),ANKRD65(dist=2444)						12	89917541	T	exonic	GALNT4,POC1B-GALNT4
1	1352941	G	downstream	ANKRD65(dist=859)						12	89918677	A	intronic	POC1B,POC1B-GALNT4
1	1353380	C	downstream	ANKRD65(dist=420)						12	89919568	T	ncRNA_exonic	POC1B-AS1
1	1353561	G	downstream	ANKRD65(dist=239)						12	89919703	A	exonic	POC1B-GALNT4
1	1353603	G	downstream	ANKRD65(dist=197)						12	89920184	T	ncRNA_intronic	POC1B-AS1
1	1353632	G	downstream	ANKRD65(dist=168)						12	89920733	T	ncRNA_intronic	POC1B-AS1
1	1354060	A	UTR3	ANKRD65(NM_001243535:c.*554T>0,NM_001243536:c.*862T>0,NM_001145210:c.*420T>0)						12	89921275	T	ncRNA_intronic	POC1B-AS1
1	1354515	G	exonic	ANKRD65						12	89921277	A	ncRNA_intronic	POC1B-AS1
1	1354594	G	exonic	ANKRD65						12	89922032	A	ncRNA_intronic	POC1B-AS1
1	1355020	A	intronic	ANKRD65						12	89922111	G	ncRNA_intronic	POC1B-AS1
1	1356550	G	UTR5	ANKRD65(NM_001243535:c.-165C>0,NM_001243536:c.-165C>0,NM_001145210:c.-165C>0)						12	89923376	T	ncRNA_intronic	POC1B-AS1
1	1357038	A	upstream	ANKRD65(dist=214)						12	89923811	C	ncRNA_intronic	POC1B-AS1
1	1357194	A	upstream	ANKRD65(dist=370)						12	89924559	T	ncRNA_intronic	POC1B-AS1
1	1357665	G	upstream	ANKRD65(dist=841)						12	89925081	A	ncRNA_intronic	POC1B-AS1
1	1357992	T	intergenic	ANKRD65(dist=1168),TMEM88B(dist=3516)						12	89925200	G	ncRNA_intronic	POC1B-AS1
1	1358208	T	intergenic	ANKRD65(dist=1384),TMEM88B(dist=3300)						12	89926658	A	ncRNA_intronic	POC1B-AS1
1	1358326	T	intergenic	ANKRD65(dist=1502),TMEM88B(dist=3182)						12	89927177	A	ncRNA_intronic	POC1B-AS1
1	1358442	T	intergenic	ANKRD65(dist=1618),TMEM88B(dist=3066)						12	89927789	G	ncRNA_intronic	POC1B-AS1
1	1358571	A	intergenic	ANKRD65(dist=1747),TMEM88B(dist=2937)						12	89927972	A	ncRNA_intronic	POC1B-AS1
1	1358723	T	intergenic	ANKRD65(dist=1899),TMEM88B(dist=2785)						12	89928905	G	ncRNA_intronic	POC1B-AS1
1	1358748	A	intergenic	ANKRD65(dist=1924),TMEM88B(dist=2760)						12	89930399	G	ncRNA_intronic	POC1B-AS1
1	1358773	T	intergenic	ANKRD65(dist=1949),TMEM88B(dist=2735)						12	89933446	C	ncRNA_intronic	POC1B-AS1
1	1358858	T	intergenic	ANKRD65(dist=2034),TMEM88B(dist=2650)						12	89933710	T	ncRNA_intronic	POC1B-AS1
1	1359458	A	intergenic	ANKRD65(dist=2634),TMEM88B(dist=2050)						12	89933763	C	ncRNA_intronic	POC1B-AS1
1	1359482	T	intergenic	ANKRD65(dist=2658),TMEM88B(dist=2026)						12	89933931	A	ncRNA_exonic	POC1B-AS1
1	1359600	G	intergenic	ANKRD65(dist=2776),TMEM88B(dist=1908)						12	89934972	C	ncRNA_exonic	POC1B-AS1
1	1360105	A	intergenic	ANKRD65(dist=3281),TMEM88B(dist=1403)						12	89935387	T	downstream	POC1B-AS1(dist=68)
1	1360107	A	intergenic	ANKRD65(dist=3283),TMEM88B(dist=1401)						12	89938030	A	intergenic	POC1B-AS1(dist=2711),ATP2B1(dist=43796)
1	1360157	A	intergenic	ANKRD65(dist=3333),TMEM88B(dist=1351)						12	89938590	A	intergenic	POC1B-AS1(dist=3271),ATP2B1(dist=43236)
1	1360199	T	intergenic	ANKRD65(dist=3375),TMEM88B(dist=1309)						12	89975167	C	intergenic	POC1B-AS1(dist=39848),ATP2B1(dist=6659)
1	1360280	C	intergenic	ANKRD65(dist=3456),TMEM88B(dist=1228)						12	89989559	C	intronic	ATP2B1
1	1360393	T	intergenic	ANKRD65(dist=3569),TMEM88B(dist=1115)						12	89998019	G	exonic	ATP2B1
1	1360475	G	intergenic	ANKRD65(dist=3651),TMEM88B(dist=1033)						12	90008959	G	intronic	ATP2B1
1	1360515	C	upstream	TMEM88B(dist=993)						12	90010242	G	intronic	ATP2B1
1	1360580	A	upstream	TMEM88B(dist=928)						12	90013089	C	intronic	ATP2B1
1	1360908	T	upstream	TMEM88B(dist=600)						12	90042859	G	intronic	ATP2B1
1	1361002	A	upstream	TMEM88B(dist=506)						12	90043679	G	intronic	ATP2B1
1	1361013	G	upstream	TMEM88B(dist=495)						12	90060586	A	intronic	ATP2B1
1	1361130	C	upstream	TMEM88B(dist=378)						12	90068338	A	intronic	ATP2B1
1	1361202	G	upstream	TMEM88B(dist=306)						12	90069932	T	intronic	ATP2B1
1	1361316	A	upstream	TMEM88B(dist=192)						12	90083433	G	intronic	ATP2B1
1	1361555	C	exonic	TMEM88B						12	90084229	G	intronic	ATP2B1
1	1361736	A	exonic	TMEM88B						12	90093226	C	intronic	ATP2B1
1	1362151	C	intronic	TMEM88B						12	90095173	C	intronic	ATP2B1
1	1363607	A	downstream	TMEM88B(dist=440)						12	90102945	G	ncRNA_exonic	ATP2B1-AS1
1	1364143	G	downstream	TMEM88B(dist=976)						12	90103702	G	ncRNA_exonic	ATP2B1-AS1
1	1364803	G	downstream	LINC01770(dist=734)						12	90107272	C	intergenic	ATP2B1-AS1(dist=1543),LINC02399(dist=234198)
1	1365464	T	downstream	LINC01770(dist=73)						12	90107306	C	intergenic	ATP2B1-AS1(dist=1577),LINC02399(dist=234164)
1	1365759	A	ncRNA_exonic	LINC01770						12	90113070	G	intergenic	ATP2B1-AS1(dist=7341),LINC02399(dist=228400)
1	1367192	T	ncRNA_intronic	LINC01770						12	90116221	G	intergenic	ATP2B1-AS1(dist=10492),LINC02399(dist=225249)
1	1367699	A	ncRNA_intronic	LINC01770						12	90231386	T	intergenic	ATP2B1-AS1(dist=125657),LINC02399(dist=110084)
1	1368060	T	ncRNA_intronic	LINC01770						12	90247669	G	intergenic	ATP2B1-AS1(dist=141940),LINC02399(dist=93801)
1	1373678	T	intronic	VWA1						12	90265051	A	intergenic	ATP2B1-AS1(dist=159322),LINC02399(dist=76419)
1	1374286	T	intronic	VWA1						12	90270781	T	intergenic	ATP2B1-AS1(dist=165052),LINC02399(dist=70689)
1	1375207	C	UTR3	VWA1(NM_022834:c.*40C>0,NM_199121:c.*788C>0)						12	90281747	A	intergenic	ATP2B1-AS1(dist=176018),LINC02399(dist=59723)
1	1375947	G	UTR3	VWA1(NM_022834:c.*780G>0,NM_199121:c.*1528G>0)						12	90298277	T	intergenic	ATP2B1-AS1(dist=192548),LINC02399(dist=43193)
1	1377535	A	UTR3	VWA1(NM_022834:c.*2368A>0,NM_199121:c.*3116A>0)						12	90325932	A	intergenic	ATP2B1-AS1(dist=220203),LINC02399(dist=15538)
1	1378008	G	UTR3	VWA1(NM_022834:c.*2841G>0,NM_199121:c.*3589G>0)						12	90337007	C	intergenic	ATP2B1-AS1(dist=231278),LINC02399(dist=4463)
1	1378102	G	UTR3	VWA1(NM_022834:c.*2935G>0,NM_199121:c.*3683G>0)						12	90341455	A	upstream	LINC02399(dist=15)
1	1378423	T	downstream	VWA1(dist=161)						12	90347493	C	intergenic	LINC02399(dist=3990),LINC02392(dist=339602)
1	1379000	A	downstream	VWA1(dist=738)						12	90348294	G	intergenic	LINC02399(dist=4791),LINC02392(dist=338801)
1	1379498	T	intergenic	VWA1(dist=1236),ATAD3C(dist=5571)						12	90348483	A	intergenic	LINC02399(dist=4980),LINC02392(dist=338612)
1	1379499	T	intergenic	VWA1(dist=1237),ATAD3C(dist=5570)						12	90351882	T	intergenic	LINC02399(dist=8379),LINC02392(dist=335213)
1	1379526	A	intergenic	VWA1(dist=1264),ATAD3C(dist=5543)						12	90355790	G	intergenic	LINC02399(dist=12287),LINC02392(dist=331305)
1	1380061	A	intergenic	VWA1(dist=1799),ATAD3C(dist=5008)						12	90361593	A	intergenic	LINC02399(dist=18090),LINC02392(dist=325502)
1	1381253	T	intergenic	VWA1(dist=2991),ATAD3C(dist=3816)						12	90362863	G	intergenic	LINC02399(dist=19360),LINC02392(dist=324232)
1	1383587	T	intergenic	VWA1(dist=5325),ATAD3C(dist=1482)						12	90364482	T	intergenic	LINC02399(dist=20979),LINC02392(dist=322613)
1	1383718	A	intergenic	VWA1(dist=5456),ATAD3C(dist=1351)						12	90366984	G	intergenic	LINC02399(dist=23481),LINC02392(dist=320111)
1	1384429	A	upstream	ATAD3C(dist=640)						12	90370231	G	intergenic	LINC02399(dist=26728),LINC02392(dist=316864)
1	1386089	T	exonic	ATAD3C						12	90376853	G	intergenic	LINC02399(dist=33350),LINC02392(dist=310242)
1	1386578	A	intronic	ATAD3C						12	90380221	A	intergenic	LINC02399(dist=36718),LINC02392(dist=306874)
1	1389078	A	intronic	ATAD3C						12	90380232	C	intergenic	LINC02399(dist=36729),LINC02392(dist=306863)
1	1391192	T	exonic	ATAD3C						12	90380358	G	intergenic	LINC02399(dist=36855),LINC02392(dist=306737)
1	1391374	C	intronic	ATAD3C						12	90382849	G	intergenic	LINC02399(dist=39346),LINC02392(dist=304246)
1	1392326	T	intronic	ATAD3C						12	90382911	G	intergenic	LINC02399(dist=39408),LINC02392(dist=304184)
1	1393120	A	intronic	ATAD3C						12	90384591	T	intergenic	LINC02399(dist=41088),LINC02392(dist=302504)
1	1396132	G	exonic	ATAD3C						12	90387019	T	intergenic	LINC02399(dist=43516),LINC02392(dist=300076)
1	1396244	A	exonic	ATAD3C						12	90390724	G	intergenic	LINC02399(dist=47221),LINC02392(dist=296371)
1	1396458	G	intronic	ATAD3C						12	90392872	T	intergenic	LINC02399(dist=49369),LINC02392(dist=294223)
1	1398008	A	exonic	ATAD3C						12	90395486	G	intergenic	LINC02399(dist=51983),LINC02392(dist=291609)
1	1398032	G	exonic	ATAD3C						12	90396480	C	intergenic	LINC02399(dist=52977),LINC02392(dist=290615)
1	1406761	A	upstream	ATAD3B(dist=384)						12	90398200	G	intergenic	LINC02399(dist=54697),LINC02392(dist=288895)
1	1407043	C	upstream	ATAD3B(dist=102)						12	90398262	C	intergenic	LINC02399(dist=54759),LINC02392(dist=288833)
1	1408959	T	intronic	ATAD3B						12	90399351	T	intergenic	LINC02399(dist=55848),LINC02392(dist=287744)
1	1409370	G	intronic	ATAD3B						12	90400213	A	intergenic	LINC02399(dist=56710),LINC02392(dist=286882)
1	1409804	T	intronic	ATAD3B						12	90407660	A	intergenic	LINC02399(dist=64157),LINC02392(dist=279435)
1	1411571	T	intronic	ATAD3B						12	90409494	T	intergenic	LINC02399(dist=65991),LINC02392(dist=277601)
1	1411931	G	intronic	ATAD3B						12	90410001	G	intergenic	LINC02399(dist=66498),LINC02392(dist=277094)
1	1415168	G	intronic	ATAD3B						12	90410435	T	intergenic	LINC02399(dist=66932),LINC02392(dist=276660)
1	1416158	C	intronic	ATAD3B						12	90412317	T	intergenic	LINC02399(dist=68814),LINC02392(dist=274778)
1	1417772	T	intronic	ATAD3B						12	90416357	C	intergenic	LINC02399(dist=72854),LINC02392(dist=270738)
1	1418306	G	intronic	ATAD3B						12	90418122	A	intergenic	LINC02399(dist=74619),LINC02392(dist=268973)
1	1418812	C	intronic	ATAD3B						12	90418283	C	intergenic	LINC02399(dist=74780),LINC02392(dist=268812)
1	1419522	G	intronic	ATAD3B						12	90418893	C	intergenic	LINC02399(dist=75390),LINC02392(dist=268202)
1	1420027	G	intronic	ATAD3B						12	90419579	T	intergenic	LINC02399(dist=76076),LINC02392(dist=267516)
1	1421002	G	intronic	ATAD3B						12	90420680	T	intergenic	LINC02399(dist=77177),LINC02392(dist=266415)
1	1421275	C	intronic	ATAD3B						12	90428346	T	intergenic	LINC02399(dist=84843),LINC02392(dist=258749)
1	1421285	A	intronic	ATAD3B						12	90432936	T	intergenic	LINC02399(dist=89433),LINC02392(dist=254159)
1	1421391	C	intronic	ATAD3B						12	90434630	A	intergenic	LINC02399(dist=91127),LINC02392(dist=252465)
1	1421463	T	intronic	ATAD3B						12	90435903	A	intergenic	LINC02399(dist=92400),LINC02392(dist=251192)
1	1421579	C	exonic	ATAD3B						12	90436082	T	intergenic	LINC02399(dist=92579),LINC02392(dist=251013)
1	1421822	G	intronic	ATAD3B						12	90436571	C	intergenic	LINC02399(dist=93068),LINC02392(dist=250524)
1	1422792	T	intronic	ATAD3B						12	90436742	T	intergenic	LINC02399(dist=93239),LINC02392(dist=250353)
1	1423009	T	intronic	ATAD3B						12	90436780	C	intergenic	LINC02399(dist=93277),LINC02392(dist=250315)
1	1424395	G	intronic	ATAD3B						12	90436965	T	intergenic	LINC02399(dist=93462),LINC02392(dist=250130)
1	1424893	T	intronic	ATAD3B						12	90437157	C	intergenic	LINC02399(dist=93654),LINC02392(dist=249938)
1	1424922	G	intronic	ATAD3B						12	90442193	A	intergenic	LINC02399(dist=98690),LINC02392(dist=244902)
1	1424924	G	intronic	ATAD3B						12	90443482	G	intergenic	LINC02399(dist=99979),LINC02392(dist=243613)
1	1425128	C	intronic	ATAD3B						12	90446791	C	intergenic	LINC02399(dist=103288),LINC02392(dist=240304)
1	1425181	T	intronic	ATAD3B						12	90446923	A	intergenic	LINC02399(dist=103420),LINC02392(dist=240172)
1	1425753	C	exonic	ATAD3B						12	90453187	T	intergenic	LINC02399(dist=109684),LINC02392(dist=233908)
1	1426237	C	intronic	ATAD3B						12	90460161	G	intergenic	LINC02399(dist=116658),LINC02392(dist=226934)
1	1426478	C	intronic	ATAD3B						12	90468335	T	intergenic	LINC02399(dist=124832),LINC02392(dist=218760)
1	1427875	G	intronic	ATAD3B						12	90474696	C	intergenic	LINC02399(dist=131193),LINC02392(dist=212399)
1	1427884	G	intronic	ATAD3B						12	90477235	A	intergenic	LINC02399(dist=133732),LINC02392(dist=209860)
1	1428129	C	intronic	ATAD3B						12	90483258	A	intergenic	LINC02399(dist=139755),LINC02392(dist=203837)
1	1428786	C	intronic	ATAD3B						12	90505910	G	intergenic	LINC02399(dist=162407),LINC02392(dist=181185)
1	1429546	T	intronic	ATAD3B						12	90525874	A	intergenic	LINC02399(dist=182371),LINC02392(dist=161221)
1	1429868	T	intronic	ATAD3B						12	90537361	A	intergenic	LINC02399(dist=193858),LINC02392(dist=149734)
1	1429933	A	intronic	ATAD3B						12	90545215	C	intergenic	LINC02399(dist=201712),LINC02392(dist=141880)
1	1429966	A	intronic	ATAD3B						12	90547474	T	intergenic	LINC02399(dist=203971),LINC02392(dist=139621)
1	1430725	G	intronic	ATAD3B						12	90549906	C	intergenic	LINC02399(dist=206403),LINC02392(dist=137189)
1	1431066	C	exonic	ATAD3B						12	90550853	T	intergenic	LINC02399(dist=207350),LINC02392(dist=136242)
1	1431709	A	UTR3	ATAD3B(NM_031921:c.*512A>0,NM_001317238:c.*512A>0)						12	90569024	T	intergenic	LINC02399(dist=225521),LINC02392(dist=118071)
1	1436060	A	intergenic	ATAD3B(dist=2832),ATAD3A(dist=11482)						12	90584610	C	intergenic	LINC02399(dist=241107),LINC02392(dist=102485)
1	1443983	G	intergenic	ATAD3B(dist=10755),ATAD3A(dist=3559)						12	90586718	T	intergenic	LINC02399(dist=243215),LINC02392(dist=100377)
1	1447597	A	UTR5	ATAD3A(NM_001170535:c.-52A>0,NM_018188:c.-52A>0)						12	90588371	T	intergenic	LINC02399(dist=244868),LINC02392(dist=98724)
1	1456812	C	intronic	ATAD3A						12	90589306	A	intergenic	LINC02399(dist=245803),LINC02392(dist=97789)
1	1461041	A	intronic	ATAD3A						12	90590748	A	intergenic	LINC02399(dist=247245),LINC02392(dist=96347)
1	1461542	G	intronic	ATAD3A						12	90592518	A	intergenic	LINC02399(dist=249015),LINC02392(dist=94577)
1	1470807	T	exonic	TMEM240						12	90592819	A	intergenic	LINC02399(dist=249316),LINC02392(dist=94276)
1	1471017	T	exonic	TMEM240						12	90594055	G	intergenic	LINC02399(dist=250552),LINC02392(dist=93040)
1	1484511	C	intronic	SSU72						12	90596029	A	intergenic	LINC02399(dist=252526),LINC02392(dist=91066)
1	1487496	T	intronic	SSU72						12	90600082	A	intergenic	LINC02399(dist=256579),LINC02392(dist=87013)
1	1496516	A	intronic	SSU72						12	90606405	G	intergenic	LINC02399(dist=262902),LINC02392(dist=80690)
1	1505604	C	intronic	SSU72						12	90607519	C	intergenic	LINC02399(dist=264016),LINC02392(dist=79576)
1	1523819	A	intergenic	SSU72(dist=13576),FNDC10(dist=9573)						12	90609855	G	intergenic	LINC02399(dist=266352),LINC02392(dist=77240)
1	1529000	C	intergenic	SSU72(dist=18757),FNDC10(dist=4392)						12	90610051	A	intergenic	LINC02399(dist=266548),LINC02392(dist=77044)
1	1529457	C	intergenic	SSU72(dist=19214),FNDC10(dist=3935)						12	90610622	A	intergenic	LINC02399(dist=267119),LINC02392(dist=76473)
1	1529511	C	intergenic	SSU72(dist=19268),FNDC10(dist=3881)						12	90610830	T	intergenic	LINC02399(dist=267327),LINC02392(dist=76265)
1	1530200	T	intergenic	SSU72(dist=19957),FNDC10(dist=3192)						12	90611784	A	intergenic	LINC02399(dist=268281),LINC02392(dist=75311)
1	1531829	A	intergenic	SSU72(dist=21586),FNDC10(dist=1563)						12	90612425	C	intergenic	LINC02399(dist=268922),LINC02392(dist=74670)
1	1531909	G	intergenic	SSU72(dist=21666),FNDC10(dist=1483)						12	90612611	T	intergenic	LINC02399(dist=269108),LINC02392(dist=74484)
1	1534614	C	UTR3	FNDC10(NM_001242659:c.*101G>0)						12	90612681	G	intergenic	LINC02399(dist=269178),LINC02392(dist=74414)
1	1537437	T	ncRNA_intronic	LOC105378586						12	90613880	G	intergenic	LINC02399(dist=270377),LINC02392(dist=73215)
1	1545270	T	intergenic	LOC105378586(dist=2680),MIB2(dist=5525)						12	90623501	T	intergenic	LINC02399(dist=279998),LINC02392(dist=63594)
1	1550992	A	exonic	MIB2						12	90626924	C	intergenic	LINC02399(dist=283421),LINC02392(dist=60171)
1	1551927	T	exonic	MIB2						12	90627409	G	intergenic	LINC02399(dist=283906),LINC02392(dist=59686)
1	1552097	A	intronic	MIB2						12	90627860	T	intergenic	LINC02399(dist=284357),LINC02392(dist=59235)
1	1552574	A	intronic	MIB2						12	90630293	T	intergenic	LINC02399(dist=286790),LINC02392(dist=56802)
1	1553668	C	intronic	MIB2						12	90630976	T	intergenic	LINC02399(dist=287473),LINC02392(dist=56119)
1	1555718	A	intronic	MIB2						12	90631461	G	intergenic	LINC02399(dist=287958),LINC02392(dist=55634)
1	1557644	T	intronic	MIB2						12	90631899	T	intergenic	LINC02399(dist=288396),LINC02392(dist=55196)
1	1558792	T	exonic	MIB2						12	90632373	T	intergenic	LINC02399(dist=288870),LINC02392(dist=54722)
1	1560103	T	intronic	MIB2						12	90633070	G	intergenic	LINC02399(dist=289567),LINC02392(dist=54025)
1	1560966	A	exonic	MIB2						12	90633651	T	intergenic	LINC02399(dist=290148),LINC02392(dist=53444)
1	1562437	G	intronic	MIB2						12	90634397	G	intergenic	LINC02399(dist=290894),LINC02392(dist=52698)
1	1562536	A	exonic	MIB2						12	90635285	T	intergenic	LINC02399(dist=291782),LINC02392(dist=51810)
1	1563121	G	exonic	MIB2						12	90635570	A	intergenic	LINC02399(dist=292067),LINC02392(dist=51525)
1	1564064	A	exonic	MIB2						12	90636997	A	intergenic	LINC02399(dist=293494),LINC02392(dist=50098)
1	1567206	A	upstream	MMP23A,MMP23B(dist=346)						12	90639088	C	intergenic	LINC02399(dist=295585),LINC02392(dist=48007)
1	1570182	A	downstream	CDK11B,MMP23A,MMP23B(dist=421)						12	90643279	T	intergenic	LINC02399(dist=299776),LINC02392(dist=43816)
1	1592630	C	intronic	CDK11B						12	90644008	C	intergenic	LINC02399(dist=300505),LINC02392(dist=43087)
1	1597403	T	exonic	SLC35E2B						12	90645425	T	intergenic	LINC02399(dist=301922),LINC02392(dist=41670)
1	1603163	T	intronic	CDK11B,SLC35E2B						12	90647787	A	intergenic	LINC02399(dist=304284),LINC02392(dist=39308)
1	1603594	A	intronic	CDK11B,SLC35E2B						12	90649346	C	intergenic	LINC02399(dist=305843),LINC02392(dist=37749)
1	1611995	G	intronic	CDK11B,SLC35E2B						12	90649877	C	intergenic	LINC02399(dist=306374),LINC02392(dist=37218)
1	1635193	C	intronic	CDK11A,CDK11B						12	90650593	G	intergenic	LINC02399(dist=307090),LINC02392(dist=36502)
1	1635565	T	exonic	CDK11A						12	90651571	T	intergenic	LINC02399(dist=308068),LINC02392(dist=35524)
1	1635928	A	intronic	CDK11A,CDK11B						12	90652403	T	intergenic	LINC02399(dist=308900),LINC02392(dist=34692)
1	1635943	C	intronic	CDK11A,CDK11B						12	90653030	T	intergenic	LINC02399(dist=309527),LINC02392(dist=34065)
1	1635979	C	intronic	CDK11A,CDK11B						12	90653564	A	intergenic	LINC02399(dist=310061),LINC02392(dist=33531)
1	1636112	A	intronic	CDK11A,CDK11B						12	90657097	G	intergenic	LINC02399(dist=313594),LINC02392(dist=29998)
1	1637466	A	intronic	CDK11A,CDK11B						12	90657408	T	intergenic	LINC02399(dist=313905),LINC02392(dist=29687)
1	1637927	G	intronic	CDK11A,CDK11B						12	90658753	T	intergenic	LINC02399(dist=315250),LINC02392(dist=28342)
1	1664124	T	intronic	SLC35E2A						12	90659059	C	intergenic	LINC02399(dist=315556),LINC02392(dist=28036)
1	1680613	C	intergenic	SLC35E2A(dist=3175),NADK(dist=2058)						12	90659083	T	intergenic	LINC02399(dist=315580),LINC02392(dist=28012)
1	1686081	A	exonic	NADK						12	90659902	C	intergenic	LINC02399(dist=316399),LINC02392(dist=27193)
1	1686087	G	exonic	NADK						12	90661829	C	intergenic	LINC02399(dist=318326),LINC02392(dist=25266)
1	1687828	T	intronic	NADK						12	90662231	C	intergenic	LINC02399(dist=318728),LINC02392(dist=24864)
1	1688096	T	exonic	NADK						12	90662341	T	intergenic	LINC02399(dist=318838),LINC02392(dist=24754)
1	1688550	T	exonic	NADK						12	90664546	T	intergenic	LINC02399(dist=321043),LINC02392(dist=22549)
1	1703008	T	intronic	NADK						12	90667674	C	intergenic	LINC02399(dist=324171),LINC02392(dist=19421)
1	1705611	C	intronic	NADK						12	90668825	A	intergenic	LINC02399(dist=325322),LINC02392(dist=18270)
1	1705818	T	intronic	NADK						12	90669062	T	intergenic	LINC02399(dist=325559),LINC02392(dist=18033)
1	1720670	A	exonic	GNB1						12	90669084	A	intergenic	LINC02399(dist=325581),LINC02392(dist=18011)
1	1721556	A	intronic	GNB1						12	90669694	G	intergenic	LINC02399(dist=326191),LINC02392(dist=17401)
1	1729167	T	intronic	GNB1						12	90671436	A	intergenic	LINC02399(dist=327933),LINC02392(dist=15659)
1	1739603	A	intronic	GNB1						12	90671979	T	intergenic	LINC02399(dist=328476),LINC02392(dist=15116)
1	1757221	A	intronic	GNB1						12	90674065	T	intergenic	LINC02399(dist=330562),LINC02392(dist=13030)
1	1776738	C	intronic	GNB1						12	90674293	C	intergenic	LINC02399(dist=330790),LINC02392(dist=12802)
1	1777077	C	intronic	GNB1						12	90675237	A	intergenic	LINC02399(dist=331734),LINC02392(dist=11858)
1	1789555	G	intronic	GNB1						12	90675592	T	intergenic	LINC02399(dist=332089),LINC02392(dist=11503)
1	1791237	T	intronic	GNB1						12	90675846	C	intergenic	LINC02399(dist=332343),LINC02392(dist=11249)
1	1799971	T	intronic	GNB1						12	90677076	T	intergenic	LINC02399(dist=333573),LINC02392(dist=10019)
1	1816279	T	intronic	GNB1						12	90677669	A	intergenic	LINC02399(dist=334166),LINC02392(dist=9426)
1	1816442	C	intronic	GNB1						12	90680300	C	intergenic	LINC02399(dist=336797),LINC02392(dist=6795)
1	1823555	C	upstream	GNB1(dist=999)						12	90680771	A	intergenic	LINC02399(dist=337268),LINC02392(dist=6324)
1	1837884	T	intergenic	GNB1(dist=15328),CALML6(dist=8815)						12	90681147	G	intergenic	LINC02399(dist=337644),LINC02392(dist=5948)
1	1849727	C	exonic	TMEM52						12	90682334	T	intergenic	LINC02399(dist=338831),LINC02392(dist=4761)
1	1856098	T	intronic	CFAP74						12	90683395	T	intergenic	LINC02399(dist=339892),LINC02392(dist=3700)
1	1859131	T	exonic	CFAP74						12	90683803	G	intergenic	LINC02399(dist=340300),LINC02392(dist=3292)
1	1859558	C	intronic	CFAP74						12	90684205	C	intergenic	LINC02399(dist=340702),LINC02392(dist=2890)
1	1860745	T	intronic	CFAP74						12	90684619	A	intergenic	LINC02399(dist=341116),LINC02392(dist=2476)
1	1861152	A	intronic	CFAP74						12	90685686	G	intergenic	LINC02399(dist=342183),LINC02392(dist=1409)
1	1868485	A	intronic	CFAP74						12	90686218	A	upstream	LINC02392(dist=877)
1	1869906	T	intronic	CFAP74						12	90688275	G	ncRNA_intronic	LINC02392
1	1873625	A	intronic	CFAP74						12	90688890	T	ncRNA_intronic	LINC02392
1	1878377	A	intronic	CFAP74						12	90689006	T	ncRNA_intronic	LINC02392
1	1879087	A	intronic	CFAP74						12	90689148	T	ncRNA_exonic	LINC02392
1	1879476	A	intronic	CFAP74						12	90689218	G	ncRNA_exonic	LINC02392
1	1879739	A	intronic	CFAP74						12	90689393	G	ncRNA_intronic	LINC02392
1	1880139	T	intronic	CFAP74						12	90690677	T	ncRNA_intronic	LINC02392
1	1887049	C	intronic	CFAP74						12	90690858	G	ncRNA_intronic	LINC02392
1	1888193	A	exonic	CFAP74						12	90691583	T	ncRNA_intronic	LINC02392
1	1890559	T	exonic	CFAP74						12	90691679	C	ncRNA_intronic	LINC02392
1	1894338	C	intronic	CFAP74						12	90692198	A	ncRNA_intronic	LINC02392
1	1900186	C	exonic	CFAP74						12	90692769	A	ncRNA_intronic	LINC02392
1	1900211	T	exonic	CFAP74						12	90693247	G	ncRNA_intronic	LINC02392
1	1900232	C	exonic	CFAP74						12	90693297	C	ncRNA_intronic	LINC02392
1	1902129	A	exonic	CFAP74						12	90693826	G	ncRNA_intronic	LINC02392
1	1902407	C	intronic	CFAP74						12	90694568	G	downstream	LINC02392(dist=93)
1	1904035	A	intronic	CFAP74						12	90694581	C	downstream	LINC02392(dist=106)
1	1905526	A	exonic	CFAP74						12	90694624	G	downstream	LINC02392(dist=149)
1	1906438	A	intronic	CFAP74						12	90695756	A	intergenic	LINC02392(dist=1281),LINC00615(dist=616044)
1	1909487	T	intronic	CFAP74						12	90695872	A	intergenic	LINC02392(dist=1397),LINC00615(dist=615928)
1	1919141	T	intronic	CFAP74						12	90696325	T	intergenic	LINC02392(dist=1850),LINC00615(dist=615475)
1	1950205	C	upstream	GABRD(dist=579)						12	90696664	A	intergenic	LINC02392(dist=2189),LINC00615(dist=615136)
1	1959428	T	intronic	GABRD						12	90696821	T	intergenic	LINC02392(dist=2346),LINC00615(dist=614979)
1	1959698	T	exonic	GABRD						12	90698244	C	intergenic	LINC02392(dist=3769),LINC00615(dist=613556)
1	1961512	T	exonic	GABRD						12	90698538	A	intergenic	LINC02392(dist=4063),LINC00615(dist=613262)
1	1970383	T	intergenic	GABRD(dist=8186),LOC105378591(dist=10257)						12	90698653	A	intergenic	LINC02392(dist=4178),LINC00615(dist=613147)
1	1980709	A	ncRNA_exonic	LOC105378591						12	90699021	A	intergenic	LINC02392(dist=4546),LINC00615(dist=612779)
1	2005375	T	intronic	PRKCZ						12	90705400	A	intergenic	LINC02392(dist=10925),LINC00615(dist=606400)
1	2038732	T	intronic	PRKCZ						12	90706385	A	intergenic	LINC02392(dist=11910),LINC00615(dist=605415)
1	2042350	A	intronic	PRKCZ						12	90707765	A	intergenic	LINC02392(dist=13290),LINC00615(dist=604035)
1	2043080	G	intronic	PRKCZ						12	90709186	T	intergenic	LINC02392(dist=14711),LINC00615(dist=602614)
1	2043792	A	intronic	PRKCZ						12	90709812	T	intergenic	LINC02392(dist=15337),LINC00615(dist=601988)
1	2045876	A	intronic	PRKCZ						12	90712228	G	intergenic	LINC02392(dist=17753),LINC00615(dist=599572)
1	2045886	T	intronic	PRKCZ						12	90712390	G	intergenic	LINC02392(dist=17915),LINC00615(dist=599410)
1	2052513	G	intronic	PRKCZ						12	90713002	G	intergenic	LINC02392(dist=18527),LINC00615(dist=598798)
1	2058580	C	intronic	PRKCZ						12	90713188	T	intergenic	LINC02392(dist=18713),LINC00615(dist=598612)
1	2059083	G	intronic	PRKCZ						12	90714263	A	intergenic	LINC02392(dist=19788),LINC00615(dist=597537)
1	2059143	A	intronic	PRKCZ						12	90714533	T	intergenic	LINC02392(dist=20058),LINC00615(dist=597267)
1	2063149	T	intronic	PRKCZ						12	90714619	G	intergenic	LINC02392(dist=20144),LINC00615(dist=597181)
1	2065949	T	intronic	PRKCZ						12	90759245	A	intergenic	LINC02392(dist=64770),LINC00615(dist=552555)
1	2065958	T	intronic	PRKCZ						12	90764312	A	intergenic	LINC02392(dist=69837),LINC00615(dist=547488)
1	2068714	A	intronic	PRKCZ						12	90794581	C	intergenic	LINC02392(dist=100106),LINC00615(dist=517219)
1	2069172	T	intronic	PRKCZ						12	90800927	A	intergenic	LINC02392(dist=106452),LINC00615(dist=510873)
1	2069681	T	intronic	PRKCZ						12	90803853	T	intergenic	LINC02392(dist=109378),LINC00615(dist=507947)
1	2070321	T	intronic	PRKCZ						12	90805557	A	intergenic	LINC02392(dist=111082),LINC00615(dist=506243)
1	2071556	A	intronic	PRKCZ						12	90807797	T	intergenic	LINC02392(dist=113322),LINC00615(dist=504003)
1	2073000	A	intronic	PRKCZ						12	90810448	G	intergenic	LINC02392(dist=115973),LINC00615(dist=501352)
1	2073553	A	intronic	PRKCZ						12	90810449	T	intergenic	LINC02392(dist=115974),LINC00615(dist=501351)
1	2075560	G	intronic	PRKCZ						12	90815886	T	intergenic	LINC02392(dist=121411),LINC00615(dist=495914)
1	2077260	T	intronic	PRKCZ						12	90819312	A	intergenic	LINC02392(dist=124837),LINC00615(dist=492488)
1	2077409	G	intronic	PRKCZ						12	90821635	A	intergenic	LINC02392(dist=127160),LINC00615(dist=490165)
1	2078385	T	intronic	PRKCZ						12	90823841	G	intergenic	LINC02392(dist=129366),LINC00615(dist=487959)
1	2078482	A	intronic	PRKCZ						12	90826178	G	intergenic	LINC02392(dist=131703),LINC00615(dist=485622)
1	2078557	A	intronic	PRKCZ						12	90830008	C	intergenic	LINC02392(dist=135533),LINC00615(dist=481792)
1	2080813	T	intronic	PRKCZ						12	90830075	A	intergenic	LINC02392(dist=135600),LINC00615(dist=481725)
1	2081517	A	intronic	PRKCZ						12	90832978	A	intergenic	LINC02392(dist=138503),LINC00615(dist=478822)
1	2082458	T	intronic	PRKCZ						12	90833632	T	intergenic	LINC02392(dist=139157),LINC00615(dist=478168)
1	2082722	C	intronic	PRKCZ						12	90837463	A	intergenic	LINC02392(dist=142988),LINC00615(dist=474337)
1	2083173	G	intronic	PRKCZ						12	90841731	T	intergenic	LINC02392(dist=147256),LINC00615(dist=470069)
1	2086645	C	intronic	PRKCZ						12	90845265	A	intergenic	LINC02392(dist=150790),LINC00615(dist=466535)
1	2086757	G	intronic	PRKCZ						12	90846280	T	intergenic	LINC02392(dist=151805),LINC00615(dist=465520)
1	2088104	G	intronic	PRKCZ						12	90851323	T	intergenic	LINC02392(dist=156848),LINC00615(dist=460477)
1	2088577	A	intronic	PRKCZ						12	90852819	A	intergenic	LINC02392(dist=158344),LINC00615(dist=458981)
1	2088754	C	intronic	PRKCZ						12	90862412	A	intergenic	LINC02392(dist=167937),LINC00615(dist=449388)
1	2089526	A	intronic	PRKCZ						12	90862878	G	intergenic	LINC02392(dist=168403),LINC00615(dist=448922)
1	2090816	C	intronic	PRKCZ						12	90868416	A	intergenic	LINC02392(dist=173941),LINC00615(dist=443384)
1	2091397	G	intronic	PRKCZ						12	90869912	T	intergenic	LINC02392(dist=175437),LINC00615(dist=441888)
1	2093734	T	intronic	PRKCZ						12	90872003	A	intergenic	LINC02392(dist=177528),LINC00615(dist=439797)
1	2093746	T	intronic	PRKCZ						12	90878635	T	intergenic	LINC02392(dist=184160),LINC00615(dist=433165)
1	2095699	T	intronic	PRKCZ						12	90884063	A	intergenic	LINC02392(dist=189588),LINC00615(dist=427737)
1	2099082	A	intronic	PRKCZ						12	90885878	C	intergenic	LINC02392(dist=191403),LINC00615(dist=425922)
1	2101687	A	intronic	PRKCZ						12	90889633	C	intergenic	LINC02392(dist=195158),LINC00615(dist=422167)
1	2104013	T	intronic	PRKCZ						12	90891079	A	intergenic	LINC02392(dist=196604),LINC00615(dist=420721)
1	2104435	T	intronic	PRKCZ						12	90893488	C	intergenic	LINC02392(dist=199013),LINC00615(dist=418312)
1	2104981	G	intronic	PRKCZ						12	90893568	C	intergenic	LINC02392(dist=199093),LINC00615(dist=418232)
1	2107061	T	intronic	PRKCZ						12	90893626	C	intergenic	LINC02392(dist=199151),LINC00615(dist=418174)
1	2110260	A	intronic	PRKCZ						12	90896238	T	intergenic	LINC02392(dist=201763),LINC00615(dist=415562)
1	2113565	G	ncRNA_exonic	PRKCZ-AS1						12	90896560	C	intergenic	LINC02392(dist=202085),LINC00615(dist=415240)
1	2117155	A	intronic	FAAP20						12	91059729	C	intergenic	LINC02392(dist=365254),LINC00615(dist=252071)
1	2125543	G	exonic	FAAP20						12	91060800	G	intergenic	LINC02392(dist=366325),LINC00615(dist=251000)
1	2129458	T	exonic	FAAP20						12	91060839	G	intergenic	LINC02392(dist=366364),LINC00615(dist=250961)
1	2129498	A	exonic	FAAP20						12	91061042	G	intergenic	LINC02392(dist=366567),LINC00615(dist=250758)
1	2131240	A	UTR5	FAAP20(NM_001282670:c.-813T>0)						12	91065648	G	intergenic	LINC02392(dist=371173),LINC00615(dist=246152)
1	2141866	T	intronic	FAAP20						12	91067465	G	intergenic	LINC02392(dist=372990),LINC00615(dist=244335)
1	2142518	C	intronic	FAAP20						12	91068209	C	intergenic	LINC02392(dist=373734),LINC00615(dist=243591)
1	2152714	T	intergenic	FAAP20(dist=8555),SKI(dist=7044)						12	91068508	C	intergenic	LINC02392(dist=374033),LINC00615(dist=243292)
1	2234791	T	exonic	SKI						12	91068574	T	intergenic	LINC02392(dist=374099),LINC00615(dist=243226)
1	2252970	T	exonic	MORN1						12	91068976	C	intergenic	LINC02392(dist=374501),LINC00615(dist=242824)
1	2262103	T	intronic	MORN1						12	91069397	A	intergenic	LINC02392(dist=374922),LINC00615(dist=242403)
1	2273614	T	intronic	MORN1						12	91070405	G	intergenic	LINC02392(dist=375930),LINC00615(dist=241395)
1	2277001	T	intronic	MORN1						12	91070867	C	intergenic	LINC02392(dist=376392),LINC00615(dist=240933)
1	2286264	A	intronic	MORN1						12	91071028	A	intergenic	LINC02392(dist=376553),LINC00615(dist=240772)
1	2290143	A	exonic	MORN1						12	91073518	T	intergenic	LINC02392(dist=379043),LINC00615(dist=238282)
1	2304000	T	exonic	MORN1						12	91073629	G	intergenic	LINC02392(dist=379154),LINC00615(dist=238171)
1	2304161	A	intronic	MORN1						12	91074224	G	intergenic	LINC02392(dist=379749),LINC00615(dist=237576)
1	2326009	G	intronic	RER1						12	91075451	T	intergenic	LINC02392(dist=380976),LINC00615(dist=236349)
1	2326812	A	intronic	RER1						12	91076007	A	intergenic	LINC02392(dist=381532),LINC00615(dist=235793)
1	2326918	A	intronic	RER1						12	91076596	G	intergenic	LINC02392(dist=382121),LINC00615(dist=235204)
1	2327075	T	intronic	RER1						12	91076730	C	intergenic	LINC02392(dist=382255),LINC00615(dist=235070)
1	2327815	C	intronic	RER1						12	91076940	C	intergenic	LINC02392(dist=382465),LINC00615(dist=234860)
1	2329661	A	intronic	RER1						12	91077041	T	intergenic	LINC02392(dist=382566),LINC00615(dist=234759)
1	2330016	C	intronic	RER1						12	91077508	A	intergenic	LINC02392(dist=383033),LINC00615(dist=234292)
1	2330190	T	intronic	RER1						12	91078579	T	intergenic	LINC02392(dist=384104),LINC00615(dist=233221)
1	2332391	C	intronic	RER1						12	91079296	A	intergenic	LINC02392(dist=384821),LINC00615(dist=232504)
1	2335969	G	UTR3	RER1(NM_007033:c.*1406G>0)						12	91079833	A	intergenic	LINC02392(dist=385358),LINC00615(dist=231967)
1	2336210	T	UTR3	RER1(NM_007033:c.*1647T>0)						12	91080025	G	intergenic	LINC02392(dist=385550),LINC00615(dist=231775)
1	2337032	T	UTR3	PEX10(NM_002617:c.*173A>0,NM_153818:c.*173A>0)						12	91082292	A	intergenic	LINC02392(dist=387817),LINC00615(dist=229508)
1	2338015	C	exonic	PEX10						12	91082817	G	intergenic	LINC02392(dist=388342),LINC00615(dist=228983)
1	2340504	T	intronic	PEX10						12	91083885	A	intergenic	LINC02392(dist=389410),LINC00615(dist=227915)
1	2411245	A	exonic	PLCH2						12	91084790	A	intergenic	LINC02392(dist=390315),LINC00615(dist=227010)
1	2411376	A	exonic	PLCH2						12	91085090	A	intergenic	LINC02392(dist=390615),LINC00615(dist=226710)
1	2411435	T	intronic	PLCH2						12	91088205	C	intergenic	LINC02392(dist=393730),LINC00615(dist=223595)
1	2426149	A	intronic	PLCH2						12	91088874	C	intergenic	LINC02392(dist=394399),LINC00615(dist=222926)
1	2426248	C	intronic	PLCH2						12	91089889	G	intergenic	LINC02392(dist=395414),LINC00615(dist=221911)
1	2426313	A	exonic	PLCH2						12	91090020	C	intergenic	LINC02392(dist=395545),LINC00615(dist=221780)
1	2426689	T	intronic	PLCH2						12	91090185	A	intergenic	LINC02392(dist=395710),LINC00615(dist=221615)
1	2427368	C	intronic	PLCH2						12	91090368	A	intergenic	LINC02392(dist=395893),LINC00615(dist=221432)
1	2429455	T	intronic	PLCH2						12	91090568	C	intergenic	LINC02392(dist=396093),LINC00615(dist=221232)
1	2431057	T	intronic	PLCH2						12	91091255	T	intergenic	LINC02392(dist=396780),LINC00615(dist=220545)
1	2435556	A	exonic	PLCH2						12	91091399	G	intergenic	LINC02392(dist=396924),LINC00615(dist=220401)
1	2435738	A	exonic	PLCH2						12	91091591	G	intergenic	LINC02392(dist=397116),LINC00615(dist=220209)
1	2436303	C	exonic	PLCH2						12	91095755	T	intergenic	LINC02392(dist=401280),LINC00615(dist=216045)
1	2437663	A	downstream	PLCH2(dist=692)						12	91097040	T	intergenic	LINC02392(dist=402565),LINC00615(dist=214760)
1	2438393	T	intergenic	PLCH2(dist=1422),PANK4(dist=1583)						12	91097225	A	intergenic	LINC02392(dist=402750),LINC00615(dist=214575)
1	2439417	T	downstream	PANK4(dist=559)						12	91099484	C	intergenic	LINC02392(dist=405009),LINC00615(dist=212316)
1	2439929	T	downstream	PANK4(dist=47)						12	91099550	C	intergenic	LINC02392(dist=405075),LINC00615(dist=212250)
1	2441358	C	exonic	PANK4						12	91100178	G	intergenic	LINC02392(dist=405703),LINC00615(dist=211622)
1	2444935	C	intronic	PANK4						12	91100420	G	intergenic	LINC02392(dist=405945),LINC00615(dist=211380)
1	2446596	A	intronic	PANK4						12	91100439	C	intergenic	LINC02392(dist=405964),LINC00615(dist=211361)
1	2447982	T	intronic	PANK4						12	91101390	A	intergenic	LINC02392(dist=406915),LINC00615(dist=210410)
1	2449924	A	intronic	PANK4						12	91101395	A	intergenic	LINC02392(dist=406920),LINC00615(dist=210405)
1	2451229	A	intronic	PANK4						12	91103578	T	intergenic	LINC02392(dist=409103),LINC00615(dist=208222)
1	2452931	T	intronic	PANK4						12	91103714	A	intergenic	LINC02392(dist=409239),LINC00615(dist=208086)
1	2453918	C	intronic	PANK4						12	91103804	T	intergenic	LINC02392(dist=409329),LINC00615(dist=207996)
1	2460428	A	UTR3	HES5(NM_001010926:c.*480T>0)						12	91104291	A	intergenic	LINC02392(dist=409816),LINC00615(dist=207509)
1	2462902	A	intergenic	HES5(dist=1200),TNFRSF14-AS1(dist=18457)						12	91105282	G	intergenic	LINC02392(dist=410807),LINC00615(dist=206518)
1	2466377	T	intergenic	HES5(dist=4675),TNFRSF14-AS1(dist=14982)						12	91107032	A	intergenic	LINC02392(dist=412557),LINC00615(dist=204768)
1	2467670	G	intergenic	HES5(dist=5968),TNFRSF14-AS1(dist=13689)						12	91107363	G	intergenic	LINC02392(dist=412888),LINC00615(dist=204437)
1	2467764	G	intergenic	HES5(dist=6062),TNFRSF14-AS1(dist=13595)						12	91108450	T	intergenic	IFIT3(dist=7725),IFIT1B(dist=29363)
1	2468022	T	intergenic	HES5(dist=6320),TNFRSF14-AS1(dist=13337)						12	91108737	A	intergenic	LINC02392(dist=414262),LINC00615(dist=203063)
1	2468177	C	intergenic	HES5(dist=6475),TNFRSF14-AS1(dist=13182)						12	91109220	A	intergenic	LINC02392(dist=414745),LINC00615(dist=202580)
1	2469097	T	intergenic	HES5(dist=7395),TNFRSF14-AS1(dist=12262)						12	91111261	T	intergenic	LINC02392(dist=416786),LINC00615(dist=200539)
1	2469207	G	intergenic	HES5(dist=7505),TNFRSF14-AS1(dist=12152)						12	91112615	T	intergenic	LINC02392(dist=418140),LINC00615(dist=199185)
1	2469243	T	intergenic	HES5(dist=7541),TNFRSF14-AS1(dist=12116)						12	91114195	C	intergenic	LINC02392(dist=419720),LINC00615(dist=197605)
1	2469356	T	intergenic	HES5(dist=7654),TNFRSF14-AS1(dist=12003)						12	91114580	C	intergenic	LINC02392(dist=420105),LINC00615(dist=197220)
1	2469512	A	intergenic	HES5(dist=7810),TNFRSF14-AS1(dist=11847)						12	91114674	T	intergenic	LINC02392(dist=420199),LINC00615(dist=197126)
1	2469594	T	intergenic	HES5(dist=7892),TNFRSF14-AS1(dist=11765)						12	91234312	A	intergenic	LINC02392(dist=539837),LINC00615(dist=77488)
1	2469692	A	intergenic	HES5(dist=7990),TNFRSF14-AS1(dist=11667)						12	91277503	A	intergenic	LINC02392(dist=583028),LINC00615(dist=34297)
1	2470026	A	intergenic	HES5(dist=8324),TNFRSF14-AS1(dist=11333)						12	91282757	G	intergenic	LINC02392(dist=588282),LINC00615(dist=29043)
1	2470368	G	intergenic	HES5(dist=8666),TNFRSF14-AS1(dist=10991)						12	91290860	A	intergenic	LINC02392(dist=596385),LINC00615(dist=20940)
1	2470845	G	intergenic	HES5(dist=9143),TNFRSF14-AS1(dist=10514)						12	91303996	G	intergenic	LINC02392(dist=609521),LINC00615(dist=7804)
1	2470877	C	intergenic	HES5(dist=9175),TNFRSF14-AS1(dist=10482)						12	91303997	T	intergenic	LINC02392(dist=609522),LINC00615(dist=7803)
1	2471745	C	intergenic	HES5(dist=10043),TNFRSF14-AS1(dist=9614)						12	91306642	T	intergenic	LINC02392(dist=612167),LINC00615(dist=5158)
1	2471955	T	intergenic	HES5(dist=10253),TNFRSF14-AS1(dist=9404)						12	91308451	C	intergenic	LINC02392(dist=613976),LINC00615(dist=3349)
1	2472090	C	intergenic	HES5(dist=10388),TNFRSF14-AS1(dist=9269)						12	91310837	T	upstream	LINC00615(dist=963)
1	2472222	T	intergenic	HES5(dist=10520),TNFRSF14-AS1(dist=9137)						12	91313992	G	ncRNA_intronic	LINC00615
1	2472946	A	intergenic	HES5(dist=11244),TNFRSF14-AS1(dist=8413)						12	91314079	T	ncRNA_intronic	LINC00615
1	2473191	T	intergenic	HES5(dist=11489),TNFRSF14-AS1(dist=8168)						12	91314139	T	ncRNA_intronic	LINC00615
1	2473258	G	intergenic	HES5(dist=11556),TNFRSF14-AS1(dist=8101)						12	91314808	G	ncRNA_intronic	LINC00615
1	2474293	A	intergenic	HES5(dist=12591),TNFRSF14-AS1(dist=7066)						12	91316063	T	ncRNA_intronic	LINC00615
1	2475474	T	intergenic	HES5(dist=13772),TNFRSF14-AS1(dist=5885)						12	91317270	T	ncRNA_intronic	LINC00615
1	2476312	C	intergenic	HES5(dist=14610),TNFRSF14-AS1(dist=5047)						12	91318498	T	ncRNA_intronic	LINC00615
1	2476784	G	intergenic	HES5(dist=15082),TNFRSF14-AS1(dist=4575)						12	91322595	T	ncRNA_intronic	LINC00615
1	2477152	A	intergenic	HES5(dist=15450),TNFRSF14-AS1(dist=4207)						12	91322777	T	ncRNA_intronic	LINC00615
1	2478637	C	intergenic	HES5(dist=16935),TNFRSF14-AS1(dist=2722)						12	91323594	G	ncRNA_intronic	LINC00615
1	2478823	T	intergenic	HES5(dist=17121),TNFRSF14-AS1(dist=2536)						12	91324715	A	ncRNA_intronic	LINC00615
1	2478967	G	intergenic	HES5(dist=17265),TNFRSF14-AS1(dist=2392)						12	91326725	G	ncRNA_intronic	LINC00615
1	2479474	T	intergenic	HES5(dist=17772),TNFRSF14-AS1(dist=1885)						12	91327146	A	ncRNA_intronic	LINC00615
1	2479938	C	intergenic	HES5(dist=18236),TNFRSF14-AS1(dist=1421)						12	91327147	A	ncRNA_intronic	LINC00615
1	2481258	G	downstream	TNFRSF14-AS1(dist=101)						12	91328336	T	ncRNA_intronic	LINC00615
1	2482621	C	ncRNA_exonic	TNFRSF14-AS1						12	91328902	T	ncRNA_intronic	LINC00615
1	2482932	T	ncRNA_exonic	TNFRSF14-AS1						12	91331773	A	ncRNA_intronic	LINC00615
1	2482995	G	ncRNA_exonic	TNFRSF14-AS1						12	91334684	A	ncRNA_intronic	LINC00615
1	2485735	A	ncRNA_exonic	TNFRSF14-AS1						12	91336705	C	ncRNA_intronic	LINC00615
1	2486868	T	ncRNA_exonic	TNFRSF14-AS1						12	91337134	G	ncRNA_intronic	LINC00615
1	2488398	T	ncRNA_intronic	TNFRSF14-AS1						12	91338599	C	ncRNA_intronic	LINC00615
1	2488560	C	intronic	TNFRSF14						12	91342309	C	ncRNA_exonic	LINC00615
1	2489200	T	exonic	TNFRSF14						12	91343423	C	downstream	LINC00615(dist=977)
1	2490922	T	intronic	TNFRSF14						12	91344087	G	intergenic	LINC00615(dist=1641),CCER1(dist=1905)
1	2491060	T	intronic	TNFRSF14						12	91344427	C	intergenic	LINC00615(dist=1981),CCER1(dist=1565)
1	2491305	T	exonic	TNFRSF14						12	91344988	A	intergenic	LINC00615(dist=2542),CCER1(dist=1004)
1	2491306	A	exonic	TNFRSF14						12	91347643	T	exonic	CCER1
1	2494330	A	exonic	TNFRSF14						12	91349083	A	upstream	CCER1(dist=130)
1	2495495	C	UTR3	TNFRSF14(NM_003820:c.*783C>0,NM_001297605:c.*937C>0)						12	91349133	A	upstream	CCER1(dist=180)
1	2495787	T	UTR3	TNFRSF14(NM_003820:c.*1075T>0,NM_001297605:c.*1229T>0)						12	91353817	C	intergenic	CCER1(dist=4864),EPYC(dist=3642)
1	2496927	A	UTR3	TNFRSF14(NM_003820:c.*2215A>0,NM_001297605:c.*2369A>0)						12	91354268	T	intergenic	CCER1(dist=5315),EPYC(dist=3191)
1	2498025	T	ncRNA_exonic	LOC100996583						12	91358072	A	exonic	EPYC
1	2498063	T	ncRNA_intronic	LOC100996583						12	91358355	G	intronic	EPYC
1	2498674	T	ncRNA_intronic	LOC100996583						12	91358637	G	intronic	EPYC
1	2500631	T	ncRNA_intronic	LOC100996583						12	91360882	G	intronic	EPYC
1	2504102	A	ncRNA_intronic	LOC100996583						12	91363018	C	intronic	EPYC
1	2504363	C	ncRNA_intronic	LOC100996583						12	91363688	G	intronic	EPYC
1	2505362	A	ncRNA_intronic	LOC100996583						12	91364607	A	intronic	EPYC
1	2505628	A	ncRNA_intronic	LOC100996583						12	91366649	C	exonic	EPYC
1	2505713	T	ncRNA_intronic	LOC100996583						12	91366944	A	intronic	EPYC
1	2506213	T	ncRNA_intronic	LOC100996583						12	91368990	C	intronic	EPYC
1	2506229	C	ncRNA_intronic	LOC100996583						12	91369329	C	intronic	EPYC
1	2506488	T	ncRNA_intronic	LOC100996583						12	91370341	T	intronic	EPYC
1	2506861	T	ncRNA_intronic	LOC100996583						12	91372169	C	intronic	EPYC
1	2507388	G	ncRNA_intronic	LOC100996583						12	91373244	T	intronic	EPYC
1	2507415	T	ncRNA_intronic	LOC100996583						12	91373384	G	intronic	EPYC
1	2507938	G	ncRNA_intronic	LOC100996583						12	91378403	G	intronic	EPYC
1	2508722	T	ncRNA_intronic	LOC100996583						12	91380094	A	intronic	EPYC
1	2509252	T	ncRNA_intronic	LOC100996583						12	91382870	G	intronic	EPYC
1	2509369	C	ncRNA_intronic	LOC100996583						12	91384013	C	intronic	EPYC
1	2509658	T	ncRNA_intronic	LOC100996583						12	91385626	C	intronic	EPYC
1	2509868	G	ncRNA_intronic	LOC100996583						12	91387801	G	intronic	EPYC
1	2510043	T	ncRNA_intronic	LOC100996583						12	91390208	T	intronic	EPYC
1	2510377	A	ncRNA_intronic	LOC100996583						12	91391271	T	intronic	EPYC
1	2510755	A	ncRNA_intronic	LOC100996583						12	91391742	T	intronic	EPYC
1	2511280	T	ncRNA_intronic	LOC100996583						12	91392217	T	intronic	EPYC
1	2511388	A	ncRNA_intronic	LOC100996583						12	91392392	G	intronic	EPYC
1	2512150	A	ncRNA_intronic	LOC100996583						12	91394680	C	intronic	EPYC
1	2512289	T	ncRNA_intronic	LOC100996583						12	91395161	G	intronic	EPYC
1	2512452	A	ncRNA_intronic	LOC100996583						12	91395489	G	intronic	EPYC
1	2512650	C	ncRNA_intronic	LOC100996583						12	91396247	T	exonic	EPYC
1	2512710	C	ncRNA_intronic	LOC100996583						12	91399905	A	intergenic	EPYC(dist=1156),KERA(dist=44365)
1	2513055	T	ncRNA_exonic	LOC100996583						12	91403787	G	intergenic	EPYC(dist=5038),KERA(dist=40483)
1	2513105	T	ncRNA_intronic	LOC100996583						12	91404000	T	intergenic	EPYC(dist=5251),KERA(dist=40270)
1	2513216	T	ncRNA_intronic	LOC100996583						12	91404141	T	intergenic	EPYC(dist=5392),KERA(dist=40129)
1	2513632	G	ncRNA_intronic	LOC100996583						12	91404189	A	intergenic	EPYC(dist=5440),KERA(dist=40081)
1	2514575	T	ncRNA_intronic	LOC100996583						12	91404202	T	intergenic	EPYC(dist=5453),KERA(dist=40068)
1	2514866	C	ncRNA_exonic	LOC100996583						12	91404495	G	intergenic	EPYC(dist=5746),KERA(dist=39775)
1	2516781	A	downstream	LOC100996583(dist=808)						12	91404519	T	intergenic	EPYC(dist=5770),KERA(dist=39751)
1	2517799	T	upstream	PRXL2B(dist=417)						12	91404568	A	intergenic	EPYC(dist=5819),KERA(dist=39702)
1	2518410	T	intronic	PRXL2B						12	91404688	T	intergenic	EPYC(dist=5939),KERA(dist=39582)
1	2518980	G	intronic	PRXL2B						12	91404767	A	intergenic	EPYC(dist=6018),KERA(dist=39503)
1	2518988	T	intronic	PRXL2B						12	91405072	A	intergenic	EPYC(dist=6323),KERA(dist=39198)
1	2520302	C	intronic	PRXL2B						12	91405200	G	intergenic	EPYC(dist=6451),KERA(dist=39070)
1	2520500	A	intronic	PRXL2B						12	91405657	G	intergenic	EPYC(dist=6908),KERA(dist=38613)
1	2520527	C	intronic	PRXL2B						12	91405667	C	intergenic	EPYC(dist=6918),KERA(dist=38603)
1	2522204	T	UTR3	MMEL1(NM_033467:c.*225A>0),PRXL2B(NM_001195737:c.*1338T>0,NM_001195741:c.*1338T>0,NM_001195736:c.*1338T>0,NM_001195738:c.*1351T>0,NM_152371:c.*1338T>0,NM_001195740:c.*1338T>0)						12	91406022	G	intergenic	EPYC(dist=7273),KERA(dist=38248)
1	2522356	A	UTR3	MMEL1(NM_033467:c.*73T>0),PRXL2B(NM_001195737:c.*1490A>0,NM_001195741:c.*1490A>0,NM_001195736:c.*1490A>0,NM_001195738:c.*1503A>0,NM_152371:c.*1490A>0,NM_001195740:c.*1490A>0)						12	91406121	C	intergenic	EPYC(dist=7372),KERA(dist=38149)
1	2523212	C	intronic	MMEL1						12	91406198	G	intergenic	EPYC(dist=7449),KERA(dist=38072)
1	2523344	A	intronic	MMEL1						12	91406201	C	intergenic	EPYC(dist=7452),KERA(dist=38069)
1	2523412	T	exonic	MMEL1						12	91406222	A	intergenic	EPYC(dist=7473),KERA(dist=38048)
1	2523696	G	intronic	MMEL1						12	91406419	C	intergenic	EPYC(dist=7670),KERA(dist=37851)
1	2523706	T	intronic	MMEL1						12	91406480	T	intergenic	EPYC(dist=7731),KERA(dist=37790)
1	2523723	T	intronic	MMEL1						12	91406538	C	intergenic	EPYC(dist=7789),KERA(dist=37732)
1	2524128	G	exonic	MMEL1						12	91406835	A	intergenic	EPYC(dist=8086),KERA(dist=37435)
1	2524205	T	intronic	MMEL1						12	91406864	A	intergenic	EPYC(dist=8115),KERA(dist=37406)
1	2524457	C	intronic	MMEL1						12	91407156	T	intergenic	EPYC(dist=8407),KERA(dist=37114)
1	2524485	T	intronic	MMEL1						12	91407745	G	intergenic	EPYC(dist=8996),KERA(dist=36525)
1	2524895	C	intronic	MMEL1						12	91409672	T	intergenic	EPYC(dist=10923),KERA(dist=34598)
1	2524915	T	intronic	MMEL1						12	91410249	T	intergenic	EPYC(dist=11500),KERA(dist=34021)
1	2524943	A	intronic	MMEL1						12	91410852	A	intergenic	EPYC(dist=12103),KERA(dist=33418)
1	2524966	T	intronic	MMEL1						12	91411268	C	intergenic	EPYC(dist=12519),KERA(dist=33002)
1	2525070	T	intronic	MMEL1						12	91411477	A	intergenic	EPYC(dist=12728),KERA(dist=32793)
1	2525152	C	intronic	MMEL1						12	91412264	A	intergenic	EPYC(dist=13515),KERA(dist=32006)
1	2525208	T	intronic	MMEL1						12	91413913	C	intergenic	EPYC(dist=15164),KERA(dist=30357)
1	2525660	A	intronic	MMEL1						12	91415843	A	intergenic	EPYC(dist=17094),KERA(dist=28427)
1	2525665	C	intronic	MMEL1						12	91418019	C	intergenic	EPYC(dist=19270),KERA(dist=26251)
1	2526571	A	intronic	MMEL1						12	91418945	T	intergenic	EPYC(dist=20196),KERA(dist=25325)
1	2526621	A	intronic	MMEL1						12	91419060	A	intergenic	EPYC(dist=20311),KERA(dist=25210)
1	2526746	G	exonic	MMEL1						12	91419072	A	intergenic	EPYC(dist=20323),KERA(dist=25198)
1	2527180	G	intronic	MMEL1						12	91419614	G	intergenic	EPYC(dist=20865),KERA(dist=24656)
1	2527694	T	intronic	MMEL1						12	91420609	C	intergenic	EPYC(dist=21860),KERA(dist=23661)
1	2528340	A	intronic	MMEL1						12	91422805	A	intergenic	EPYC(dist=24056),KERA(dist=21465)
1	2528775	A	intronic	MMEL1						12	91423210	T	intergenic	EPYC(dist=24461),KERA(dist=21060)
1	2530743	A	intronic	MMEL1						12	91425122	A	intergenic	EPYC(dist=26373),KERA(dist=19148)
1	2531211	A	intronic	MMEL1						12	91425738	G	intergenic	EPYC(dist=26989),KERA(dist=18532)
1	2532527	A	intronic	MMEL1						12	91425914	T	intergenic	EPYC(dist=27165),KERA(dist=18356)
1	2533250	A	intronic	MMEL1						12	91426064	C	intergenic	EPYC(dist=27315),KERA(dist=18206)
1	2533552	C	intronic	MMEL1						12	91427522	A	intergenic	EPYC(dist=28773),KERA(dist=16748)
1	2533706	A	intronic	MMEL1						12	91427815	G	intergenic	EPYC(dist=29066),KERA(dist=16455)
1	2533832	A	intronic	MMEL1						12	91428226	C	intergenic	EPYC(dist=29477),KERA(dist=16044)
1	2534087	T	intronic	MMEL1						12	91429148	T	intergenic	EPYC(dist=30399),KERA(dist=15122)
1	2534247	C	intronic	MMEL1						12	91429830	T	intergenic	EPYC(dist=31081),KERA(dist=14440)
1	2534375	A	intronic	MMEL1						12	91430061	C	intergenic	EPYC(dist=31312),KERA(dist=14209)
1	2534801	C	intronic	MMEL1						12	91430557	G	intergenic	EPYC(dist=31808),KERA(dist=13713)
1	2534978	A	intronic	MMEL1						12	91432408	A	intergenic	EPYC(dist=33659),KERA(dist=11862)
1	2535397	G	exonic	MMEL1						12	91432529	A	intergenic	EPYC(dist=33780),KERA(dist=11741)
1	2535613	A	exonic	MMEL1						12	91434586	T	intergenic	EPYC(dist=35837),KERA(dist=9684)
1	2535758	G	intronic	MMEL1						12	91435974	T	intergenic	EPYC(dist=37225),KERA(dist=8296)
1	2535895	T	intronic	MMEL1						12	91436235	C	intergenic	EPYC(dist=37486),KERA(dist=8035)
1	2536002	G	intronic	MMEL1						12	91436451	G	intergenic	EPYC(dist=37702),KERA(dist=7819)
1	2536813	A	intronic	MMEL1						12	91438271	A	intergenic	EPYC(dist=39522),KERA(dist=5999)
1	2537095	A	intronic	MMEL1						12	91438873	A	intergenic	EPYC(dist=40124),KERA(dist=5397)
1	2537166	T	intronic	MMEL1						12	91439632	A	intergenic	EPYC(dist=40883),KERA(dist=4638)
1	2537229	T	intronic	MMEL1						12	91445554	G	intronic	KERA
1	2537432	A	intronic	MMEL1						12	91445714	C	intronic	KERA
1	2537464	G	intronic	MMEL1						12	91446454	A	intronic	KERA
1	2537838	T	intronic	MMEL1						12	91447120	G	intronic	KERA
1	2538209	A	intronic	MMEL1						12	91447473	G	intronic	KERA
1	2538344	G	intronic	MMEL1						12	91447523	G	intronic	KERA
1	2538349	A	intronic	MMEL1						12	91447893	T	intronic	KERA
1	2538738	T	intronic	MMEL1						12	91450082	A	intronic	KERA
1	2538886	T	intronic	MMEL1						12	91450701	G	intronic	KERA
1	2539006	C	intronic	MMEL1						12	91452169	C	upstream	KERA(dist=38)
1	2539181	T	intronic	MMEL1						12	91452184	C	upstream	KERA(dist=53)
1	2539400	C	intronic	MMEL1						12	91455749	A	intergenic	KERA(dist=3618),LUM(dist=40657)
1	2539532	G	intronic	MMEL1						12	91458219	A	intergenic	KERA(dist=6088),LUM(dist=38187)
1	2539555	G	intronic	MMEL1						12	91459035	G	intergenic	KERA(dist=6904),LUM(dist=37371)
1	2539590	T	intronic	MMEL1						12	91460424	C	intergenic	KERA(dist=8293),LUM(dist=35982)
1	2539603	A	intronic	MMEL1						12	91460513	T	intergenic	KERA(dist=8382),LUM(dist=35893)
1	2539659	A	intronic	MMEL1						12	91462276	G	intergenic	KERA(dist=10145),LUM(dist=34130)
1	2539674	A	intronic	MMEL1						12	91466496	G	intergenic	KERA(dist=14365),LUM(dist=29910)
1	2539796	T	intronic	MMEL1						12	91467715	G	intergenic	KERA(dist=15584),LUM(dist=28691)
1	2539901	C	intronic	MMEL1						12	91468906	A	intergenic	KERA(dist=16775),LUM(dist=27500)
1	2540262	T	intronic	MMEL1						12	91493134	T	intergenic	KERA(dist=41003),LUM(dist=3272)
1	2541269	G	exonic	MMEL1						12	91493462	C	intergenic	KERA(dist=41331),LUM(dist=2944)
1	2542653	G	intronic	MMEL1						12	91502161	G	exonic	LUM
1	2543875	T	intronic	MMEL1						12	91533430	C	downstream	DCN(dist=831)
1	2544640	A	intronic	MMEL1						12	91599456	G	intergenic	DCN(dist=22862),LINC01619(dist=779296)
1	2545526	T	intronic	MMEL1						12	91665498	T	intergenic	DCN(dist=88904),LINC01619(dist=713254)
1	2546229	A	intronic	MMEL1						12	91980374	C	intergenic	DCN(dist=403780),LINC01619(dist=398378)
1	2547609	G	intronic	MMEL1						12	91985690	A	intergenic	DCN(dist=409096),LINC01619(dist=393062)
1	2547849	T	intronic	MMEL1						12	91986482	T	intergenic	DCN(dist=409888),LINC01619(dist=392270)
1	2551053	C	intronic	MMEL1						12	91989837	T	intergenic	DCN(dist=413243),LINC01619(dist=388915)
1	2551660	G	intronic	MMEL1						12	91992591	C	intergenic	DCN(dist=415997),LINC01619(dist=386161)
1	2552071	C	intronic	MMEL1						12	91996056	G	intergenic	DCN(dist=419462),LINC01619(dist=382696)
1	2552831	G	intronic	MMEL1						12	91998199	G	intergenic	DCN(dist=421605),LINC01619(dist=380553)
1	2553083	A	intronic	MMEL1						12	92006603	T	intergenic	DCN(dist=430009),LINC01619(dist=372149)
1	2553624	C	intronic	MMEL1						12	92012201	C	intergenic	DCN(dist=435607),LINC01619(dist=366551)
1	2553751	T	intronic	MMEL1						12	92067488	A	intergenic	DCN(dist=490894),LINC01619(dist=311264)
1	2553758	T	intronic	MMEL1						12	92067711	T	intergenic	DCN(dist=491117),LINC01619(dist=311041)
1	2554120	G	intronic	MMEL1						12	92069535	T	intergenic	DCN(dist=492941),LINC01619(dist=309217)
1	2554563	G	intronic	MMEL1						12	92070211	C	intergenic	DCN(dist=493617),LINC01619(dist=308541)
1	2555129	T	intronic	MMEL1						12	92071049	A	intergenic	DCN(dist=494455),LINC01619(dist=307703)
1	2555161	A	intronic	MMEL1						12	92072728	G	intergenic	DCN(dist=496134),LINC01619(dist=306024)
1	2555640	A	intronic	MMEL1						12	92073430	C	intergenic	DCN(dist=496836),LINC01619(dist=305322)
1	2556125	T	intronic	MMEL1						12	92077311	T	intergenic	DCN(dist=500717),LINC01619(dist=301441)
1	2556529	G	intronic	MMEL1						12	92079915	G	intergenic	DCN(dist=503321),LINC01619(dist=298837)
1	2556548	T	intronic	MMEL1						12	92080205	G	intergenic	DCN(dist=503611),LINC01619(dist=298547)
1	2556709	A	intronic	MMEL1						12	92080228	C	intergenic	DCN(dist=503634),LINC01619(dist=298524)
1	2558209	T	intronic	MMEL1						12	92084627	G	intergenic	DCN(dist=508033),LINC01619(dist=294125)
1	2558883	C	intronic	MMEL1						12	92084642	T	intergenic	DCN(dist=508048),LINC01619(dist=294110)
1	2559503	A	intronic	MMEL1						12	92085045	T	intergenic	DCN(dist=508451),LINC01619(dist=293707)
1	2561985	T	intronic	MMEL1						12	92088006	C	intergenic	DCN(dist=511412),LINC01619(dist=290746)
1	2562077	T	intronic	MMEL1						12	92090271	G	intergenic	DCN(dist=513677),LINC01619(dist=288481)
1	2563901	C	intronic	MMEL1						12	92092330	A	intergenic	DCN(dist=515736),LINC01619(dist=286422)
1	2563996	G	intronic	MMEL1						12	92100758	G	intergenic	DCN(dist=524164),LINC01619(dist=277994)
1	2566938	G	intergenic	MMEL1(dist=2483),TTC34(dist=5770)						12	92116778	C	intergenic	DCN(dist=540184),LINC01619(dist=261974)
1	2567641	A	intergenic	MMEL1(dist=3186),TTC34(dist=5067)						12	92117210	G	intergenic	DCN(dist=540616),LINC01619(dist=261542)
1	2567651	G	intergenic	MMEL1(dist=3196),TTC34(dist=5057)						12	92118207	A	intergenic	DCN(dist=541613),LINC01619(dist=260545)
1	2568298	T	intergenic	MMEL1(dist=3843),TTC34(dist=4410)						12	92118283	A	intergenic	DCN(dist=541689),LINC01619(dist=260469)
1	2569333	T	intergenic	MMEL1(dist=4878),TTC34(dist=3375)						12	92121177	C	intergenic	DCN(dist=544583),LINC01619(dist=257575)
1	2569552	T	intergenic	MMEL1(dist=5097),TTC34(dist=3156)						12	92122332	A	intergenic	DCN(dist=545738),LINC01619(dist=256420)
1	2569783	T	intergenic	MMEL1(dist=5328),TTC34(dist=2925)						12	92123021	T	intergenic	DCN(dist=546427),LINC01619(dist=255731)
1	2571270	T	intergenic	MMEL1(dist=6815),TTC34(dist=1438)						12	92123370	G	intergenic	DCN(dist=546776),LINC01619(dist=255382)
1	2571586	T	intergenic	MMEL1(dist=7131),TTC34(dist=1122)						12	92125986	G	intergenic	DCN(dist=549392),LINC01619(dist=252766)
1	2573984	T	intronic	TTC34						12	92129614	G	intergenic	DCN(dist=553020),LINC01619(dist=249138)
1	2575096	C	intronic	TTC34						12	92131640	G	intergenic	DCN(dist=555046),LINC01619(dist=247112)
1	2575390	T	intronic	TTC34						12	92131997	A	intergenic	DCN(dist=555403),LINC01619(dist=246755)
1	2575533	T	intronic	TTC34						12	92132559	C	intergenic	DCN(dist=555965),LINC01619(dist=246193)
1	2577613	C	intronic	TTC34						12	92134539	A	intergenic	DCN(dist=557945),LINC01619(dist=244213)
1	2577786	A	intronic	TTC34						12	92135117	A	intergenic	DCN(dist=558523),LINC01619(dist=243635)
1	2579469	G	intronic	TTC34						12	92138154	G	intergenic	DCN(dist=561560),LINC01619(dist=240598)
1	2581072	C	intronic	TTC34						12	92142178	C	intergenic	DCN(dist=565584),LINC01619(dist=236574)
1	2581349	G	intronic	TTC34						12	92151603	T	intergenic	DCN(dist=575009),LINC01619(dist=227149)
1	2582251	G	intronic	TTC34						12	92154270	A	intergenic	DCN(dist=577676),LINC01619(dist=224482)
1	2582502	C	intronic	TTC34						12	92154464	A	intergenic	DCN(dist=577870),LINC01619(dist=224288)
1	2583322	C	intronic	TTC34						12	92159557	T	intergenic	DCN(dist=582963),LINC01619(dist=219195)
1	2630880	T	intronic	TTC34						12	92159919	A	intergenic	DCN(dist=583325),LINC01619(dist=218833)
1	2631230	A	intronic	TTC34						12	92160974	C	intergenic	DCN(dist=584380),LINC01619(dist=217778)
1	2631388	C	intronic	TTC34						12	92161448	T	intergenic	DCN(dist=584854),LINC01619(dist=217304)
1	2632016	G	intronic	TTC34						12	92163893	G	intergenic	DCN(dist=587299),LINC01619(dist=214859)
1	2632057	T	intronic	TTC34						12	92164302	T	intergenic	DCN(dist=587708),LINC01619(dist=214450)
1	2632123	G	intronic	TTC34						12	92169614	G	intergenic	DCN(dist=593020),LINC01619(dist=209138)
1	2632289	T	intronic	TTC34						12	92170243	C	intergenic	DCN(dist=593649),LINC01619(dist=208509)
1	2694391	A	intronic	TTC34						12	92171492	G	intergenic	DCN(dist=594898),LINC01619(dist=207260)
1	2694717	C	intronic	TTC34						12	92172025	G	intergenic	DCN(dist=595431),LINC01619(dist=206727)
1	2695887	A	intronic	TTC34						12	92173781	G	intergenic	DCN(dist=597187),LINC01619(dist=204971)
1	2696015	C	intronic	TTC34						12	92174289	G	intergenic	DCN(dist=597695),LINC01619(dist=204463)
1	2696024	A	intronic	TTC34						12	92174581	A	intergenic	DCN(dist=597987),LINC01619(dist=204171)
1	2696067	T	intronic	TTC34						12	92176703	A	intergenic	DCN(dist=600109),LINC01619(dist=202049)
1	2696338	G	intronic	TTC34						12	92177483	T	intergenic	DCN(dist=600889),LINC01619(dist=201269)
1	2697238	T	intronic	TTC34						12	92177784	T	intergenic	DCN(dist=601190),LINC01619(dist=200968)
1	2698278	T	intronic	TTC34						12	92179266	T	intergenic	DCN(dist=602672),LINC01619(dist=199486)
1	2698875	A	intronic	TTC34						12	92180683	G	intergenic	DCN(dist=604089),LINC01619(dist=198069)
1	2700372	T	intronic	TTC34						12	92183942	G	intergenic	DCN(dist=607348),LINC01619(dist=194810)
1	2700647	A	intronic	TTC34						12	92185102	T	intergenic	DCN(dist=608508),LINC01619(dist=193650)
1	2700740	T	intronic	TTC34						12	92186339	G	intergenic	DCN(dist=609745),LINC01619(dist=192413)
1	2700969	G	intronic	TTC34						12	92186974	G	intergenic	DCN(dist=610380),LINC01619(dist=191778)
1	2701112	C	intronic	TTC34						12	92187733	A	intergenic	DCN(dist=611139),LINC01619(dist=191019)
1	2701400	A	intronic	TTC34						12	92187942	C	intergenic	DCN(dist=611348),LINC01619(dist=190810)
1	2701799	C	intronic	TTC34						12	92188267	G	intergenic	DCN(dist=611673),LINC01619(dist=190485)
1	2702595	A	intronic	TTC34						12	92189938	A	intergenic	DCN(dist=613344),LINC01619(dist=188814)
1	2703318	T	intronic	TTC34						12	92190910	G	intergenic	DCN(dist=614316),LINC01619(dist=187842)
1	2704112	C	exonic	TTC34						12	92191384	A	intergenic	DCN(dist=614790),LINC01619(dist=187368)
1	2704474	C	intronic	TTC34						12	92192110	A	intergenic	DCN(dist=615516),LINC01619(dist=186642)
1	2705873	A	intronic	TTC34						12	92192604	A	intergenic	DCN(dist=616010),LINC01619(dist=186148)
1	2706162	C	exonic	TTC34						12	92194732	A	intergenic	DCN(dist=618138),LINC01619(dist=184020)
1	2707222	T	intronic	TTC34						12	92194792	T	intergenic	DCN(dist=618198),LINC01619(dist=183960)
1	2707710	G	intronic	TTC34						12	92195041	G	intergenic	DCN(dist=618447),LINC01619(dist=183711)
1	2707714	G	intronic	TTC34						12	92197455	G	intergenic	DCN(dist=620861),LINC01619(dist=181297)
1	2707957	A	intronic	TTC34						12	92197773	A	intergenic	DCN(dist=621179),LINC01619(dist=180979)
1	2708280	T	intronic	TTC34						12	92200357	T	intergenic	DCN(dist=623763),LINC01619(dist=178395)
1	2708286	C	intronic	TTC34						12	92201440	G	intergenic	DCN(dist=624846),LINC01619(dist=177312)
1	2708518	T	intronic	TTC34						12	92201600	T	intergenic	DCN(dist=625006),LINC01619(dist=177152)
1	2708747	A	intronic	TTC34						12	92202418	C	intergenic	DCN(dist=625824),LINC01619(dist=176334)
1	2708810	T	intronic	TTC34						12	92202590	C	intergenic	DCN(dist=625996),LINC01619(dist=176162)
1	2709364	A	intronic	TTC34						12	92203496	A	intergenic	DCN(dist=626902),LINC01619(dist=175256)
1	2711633	A	intronic	TTC34						12	92204429	T	intergenic	DCN(dist=627835),LINC01619(dist=174323)
1	2714061	A	intronic	TTC34						12	92204494	T	intergenic	DCN(dist=627900),LINC01619(dist=174258)
1	2715994	C	intronic	TTC34						12	92205637	G	intergenic	DCN(dist=629043),LINC01619(dist=173115)
1	2716288	A	intronic	TTC34						12	92207379	A	intergenic	DCN(dist=630785),LINC01619(dist=171373)
1	2717687	A	upstream	TTC34(dist=254)						12	92207940	A	intergenic	DCN(dist=631346),LINC01619(dist=170812)
1	2718694	T	intergenic	TTC34(dist=1261),ACTRT2(dist=219337)						12	92209300	A	intergenic	DCN(dist=632706),LINC01619(dist=169452)
1	2720087	G	intergenic	TTC34(dist=2654),ACTRT2(dist=217944)						12	92209528	T	intergenic	DCN(dist=632934),LINC01619(dist=169224)
1	2720110	A	intergenic	TTC34(dist=2677),ACTRT2(dist=217921)						12	92210589	A	intergenic	DCN(dist=633995),LINC01619(dist=168163)
1	2721521	A	intergenic	TTC34(dist=4088),ACTRT2(dist=216510)						12	92211755	G	intergenic	DCN(dist=635161),LINC01619(dist=166997)
1	2721817	C	intergenic	TTC34(dist=4384),ACTRT2(dist=216214)						12	92212266	C	intergenic	DCN(dist=635672),LINC01619(dist=166486)
1	2721996	T	intergenic	TTC34(dist=4563),ACTRT2(dist=216035)						12	92213479	T	intergenic	DCN(dist=636885),LINC01619(dist=165273)
1	2723172	G	intergenic	TTC34(dist=5739),ACTRT2(dist=214859)						12	92214494	C	intergenic	DCN(dist=637900),LINC01619(dist=164258)
1	2725952	T	intergenic	TTC34(dist=8519),ACTRT2(dist=212079)						12	92214658	T	intergenic	DCN(dist=638064),LINC01619(dist=164094)
1	2729760	A	intergenic	TTC34(dist=12327),ACTRT2(dist=208271)						12	92217282	T	intergenic	DCN(dist=640688),LINC01619(dist=161470)
1	2742979	T	intergenic	TTC34(dist=25546),ACTRT2(dist=195052)						12	92221675	T	intergenic	DCN(dist=645081),LINC01619(dist=157077)
1	2806107	G	intergenic	TTC34(dist=88674),ACTRT2(dist=131924)						12	92226962	A	intergenic	DCN(dist=650368),LINC01619(dist=151790)
1	2806755	T	intergenic	TTC34(dist=89322),ACTRT2(dist=131276)						12	92228347	T	intergenic	DCN(dist=651753),LINC01619(dist=150405)
1	2937228	A	upstream	ACTRT2(dist=803)						12	92231037	G	intergenic	DCN(dist=654443),LINC01619(dist=147715)
1	2938569	T	exonic	ACTRT2						12	92237091	G	intergenic	DCN(dist=660497),LINC01619(dist=141661)
1	2938924	G	exonic	ACTRT2						12	92548820	G	ncRNA_intronic	LOC101928617
1	2938989	A	exonic	ACTRT2						12	92559796	A	ncRNA_intronic	LOC101928617
1	2940337	G	downstream	ACTRT2(dist=870)						12	92756489	T	intergenic	LOC101928617(dist=176929),CLLU1OS(dist=57381)
1	3083712	C	intronic	PRDM16						12	92771295	A	intergenic	LOC101928617(dist=191735),CLLU1OS(dist=42575)
1	3087373	A	intronic	PRDM16						12	92772307	C	intergenic	LOC101928617(dist=192747),CLLU1OS(dist=41563)
1	3089976	G	intronic	PRDM16						12	92775384	C	intergenic	LOC101928617(dist=195824),CLLU1OS(dist=38486)
1	3093302	G	intronic	PRDM16						12	92778438	T	intergenic	LOC101928617(dist=198878),CLLU1OS(dist=35432)
1	3098360	A	intronic	PRDM16						12	92780995	A	intergenic	LOC101928617(dist=201435),CLLU1OS(dist=32875)
1	3102751	A	exonic	PRDM16						12	92783907	T	intergenic	LOC101928617(dist=204347),CLLU1OS(dist=29963)
1	3111669	A	intronic	PRDM16						12	92786263	A	intergenic	LOC101928617(dist=206703),CLLU1OS(dist=27607)
1	3111748	T	intronic	PRDM16						12	92787053	T	intergenic	LOC101928617(dist=207493),CLLU1OS(dist=26817)
1	3112278	A	intronic	PRDM16						12	92787619	A	intergenic	LOC101928617(dist=208059),CLLU1OS(dist=26251)
1	3112417	C	intronic	PRDM16						12	92787888	C	intergenic	LOC101928617(dist=208328),CLLU1OS(dist=25982)
1	3113148	G	intronic	PRDM16						12	92789441	C	intergenic	LOC101928617(dist=209881),CLLU1OS(dist=24429)
1	3113680	C	intronic	PRDM16						12	92800809	A	intergenic	LOC101928617(dist=221249),CLLU1OS(dist=13061)
1	3113818	T	intronic	PRDM16						12	92804247	A	intergenic	LOC101928617(dist=224687),CLLU1OS(dist=9623)
1	3115232	G	intronic	PRDM16						12	92804600	A	intergenic	LOC101928617(dist=225040),CLLU1OS(dist=9270)
1	3116361	G	intronic	PRDM16						12	92807250	G	intergenic	LOC101928617(dist=227690),CLLU1OS(dist=6620)
1	3277791	A	intronic	PRDM16						12	92809462	T	intergenic	LOC101928617(dist=229902),CLLU1OS(dist=4408)
1	3278959	T	intronic	PRDM16						12	92811508	G	intergenic	LOC101928617(dist=231948),CLLU1OS(dist=2362)
1	3279268	A	intronic	PRDM16						12	92811581	A	intergenic	LOC101928617(dist=232021),CLLU1OS(dist=2289)
1	3280253	A	intronic	PRDM16						12	92814141	A	UTR3	CLLU1OS(NM_001025232:c.*107T>0)
1	3282667	C	intronic	PRDM16						12	92814974	G	intronic	CLLU1OS
1	3283658	C	intronic	PRDM16						12	92815040	T	intronic	CLLU1OS
1	3285750	G	intronic	PRDM16						12	92816016	G	ncRNA_intronic	CLLU1
1	3288351	T	intronic	PRDM16						12	92816433	A	ncRNA_intronic	CLLU1
1	3289495	T	intronic	PRDM16						12	92817234	G	ncRNA_intronic	CLLU1
1	3314507	A	intronic	PRDM16						12	92818482	T	ncRNA_intronic	CLLU1
1	3320476	A	intronic	PRDM16						12	92818673	G	ncRNA_intronic	CLLU1
1	3321715	C	intronic	PRDM16						12	92818773	T	ncRNA_intronic	CLLU1
1	3328659	T	exonic	PRDM16						12	92820227	G	ncRNA_intronic	CLLU1
1	3329051	A	exonic	PRDM16						12	92820488	C	ncRNA_intronic	CLLU1
1	3351348	T	UTR3	PRDM16(NM_022114:c.*973T>0,NM_199454:c.*973T>0)						12	92820683	A	ncRNA_intronic	CLLU1
1	3352175	A	UTR3	PRDM16(NM_022114:c.*1800A>0,NM_199454:c.*1800A>0)						12	92820796	A	ncRNA_intronic	CLLU1
1	3352788	T	UTR3	PRDM16(NM_022114:c.*2413T>0,NM_199454:c.*2413T>0)						12	92822856	A	ncRNA_exonic	CLLU1
1	3359658	A	intergenic	PRDM16(dist=4473),ARHGEF16(dist=11571)						12	92871523	C	ncRNA_intronic	LINC02397
1	3360794	G	intergenic	PRDM16(dist=5609),ARHGEF16(dist=10435)						12	92876567	A	ncRNA_exonic	LINC02397
1	3361808	C	intergenic	PRDM16(dist=6623),ARHGEF16(dist=9421)						12	92890520	T	intergenic	LINC02397(dist=12797),C12orf74(dist=206099)
1	3361815	C	intergenic	PRDM16(dist=6630),ARHGEF16(dist=9414)						12	92904799	A	intergenic	LINC02397(dist=27076),C12orf74(dist=191820)
1	3362091	G	intergenic	PRDM16(dist=6906),ARHGEF16(dist=9138)						12	92918115	G	intergenic	LINC02397(dist=40392),C12orf74(dist=178504)
1	3362802	C	intergenic	PRDM16(dist=7617),ARHGEF16(dist=8427)						12	92923422	T	intergenic	LINC02397(dist=45699),C12orf74(dist=173197)
1	3363011	G	intergenic	PRDM16(dist=7826),ARHGEF16(dist=8218)						12	92948635	C	intergenic	LINC02397(dist=70912),C12orf74(dist=147984)
1	3363236	G	intergenic	PRDM16(dist=8051),ARHGEF16(dist=7993)						12	92962528	G	intergenic	LINC02397(dist=84805),C12orf74(dist=134091)
1	3363467	T	intergenic	PRDM16(dist=8282),ARHGEF16(dist=7762)						12	92972531	T	intergenic	LINC02397(dist=94808),C12orf74(dist=124088)
1	3363589	A	intergenic	PRDM16(dist=8404),ARHGEF16(dist=7640)						12	92972809	G	intergenic	LINC02397(dist=95086),C12orf74(dist=123810)
1	3364487	T	intergenic	PRDM16(dist=9302),ARHGEF16(dist=6742)						12	92973677	G	intergenic	LINC02397(dist=95954),C12orf74(dist=122942)
1	3364520	C	intergenic	PRDM16(dist=9335),ARHGEF16(dist=6709)						12	92974674	A	intergenic	LINC02397(dist=96951),C12orf74(dist=121945)
1	3364969	T	intergenic	PRDM16(dist=9784),ARHGEF16(dist=6260)						12	92974754	A	intergenic	LINC02397(dist=97031),C12orf74(dist=121865)
1	3365253	A	intergenic	PRDM16(dist=10068),ARHGEF16(dist=5976)						12	92975492	C	intergenic	LINC02397(dist=97769),C12orf74(dist=121127)
1	3366013	T	intergenic	PRDM16(dist=10828),ARHGEF16(dist=5216)						12	92975522	C	intergenic	LINC02397(dist=97799),C12orf74(dist=121097)
1	3366133	T	intergenic	PRDM16(dist=10948),ARHGEF16(dist=5096)						12	92976785	A	intergenic	LINC02397(dist=99062),C12orf74(dist=119834)
1	3368035	C	intergenic	PRDM16(dist=12850),ARHGEF16(dist=3194)						12	92977464	G	intergenic	LINC02397(dist=99741),C12orf74(dist=119155)
1	3368143	A	intergenic	PRDM16(dist=12958),ARHGEF16(dist=3086)						12	92978857	A	intergenic	LINC02397(dist=101134),C12orf74(dist=117762)
1	3368341	G	intergenic	PRDM16(dist=13156),ARHGEF16(dist=2888)						12	92986165	T	intergenic	LINC02397(dist=108442),C12orf74(dist=110454)
1	3369820	T	intergenic	PRDM16(dist=14635),ARHGEF16(dist=1409)						12	92986896	G	intergenic	LINC02397(dist=109173),C12orf74(dist=109723)
1	3369847	G	intergenic	PRDM16(dist=14662),ARHGEF16(dist=1382)						12	92987787	G	intergenic	LINC02397(dist=110064),C12orf74(dist=108832)
1	3371981	C	intronic	ARHGEF16						12	92988762	T	intergenic	LINC02397(dist=111039),C12orf74(dist=107857)
1	3372471	C	intronic	ARHGEF16						12	92988986	A	intergenic	LINC02397(dist=111263),C12orf74(dist=107633)
1	3372669	C	intronic	ARHGEF16						12	92989084	T	intergenic	LINC02397(dist=111361),C12orf74(dist=107535)
1	3372857	G	intronic	ARHGEF16						12	92989136	G	intergenic	LINC02397(dist=111413),C12orf74(dist=107483)
1	3373475	T	intronic	ARHGEF16						12	92989699	T	intergenic	LINC02397(dist=111976),C12orf74(dist=106920)
1	3373611	G	intronic	ARHGEF16						12	92991579	A	intergenic	LINC02397(dist=113856),C12orf74(dist=105040)
1	3373967	G	intronic	ARHGEF16						12	92993224	A	intergenic	LINC02397(dist=115501),C12orf74(dist=103395)
1	3374018	A	intronic	ARHGEF16						12	92994875	G	intergenic	LINC02397(dist=117152),C12orf74(dist=101744)
1	3374158	A	intronic	ARHGEF16						12	92996526	T	intergenic	LINC02397(dist=118803),C12orf74(dist=100093)
1	3374943	G	intronic	ARHGEF16						12	92997796	T	intergenic	LINC02397(dist=120073),C12orf74(dist=98823)
1	3375368	G	intronic	ARHGEF16						12	92998514	G	intergenic	LINC02397(dist=120791),C12orf74(dist=98105)
1	3375723	G	intronic	ARHGEF16						12	92999557	A	intergenic	LINC02397(dist=121834),C12orf74(dist=97062)
1	3375933	T	intronic	ARHGEF16						12	92999602	C	intergenic	LINC02397(dist=121879),C12orf74(dist=97017)
1	3376193	T	intronic	ARHGEF16						12	93000393	A	intergenic	LINC02397(dist=122670),C12orf74(dist=96226)
1	3376533	C	intronic	ARHGEF16						12	93001830	C	intergenic	LINC02397(dist=124107),C12orf74(dist=94789)
1	3377123	T	intronic	ARHGEF16						12	93002590	C	intergenic	LINC02397(dist=124867),C12orf74(dist=94029)
1	3377288	A	intronic	ARHGEF16						12	93004319	A	intergenic	LINC02397(dist=126596),C12orf74(dist=92300)
1	3377343	C	intronic	ARHGEF16						12	93006384	C	intergenic	LINC02397(dist=128661),C12orf74(dist=90235)
1	3379309	A	intronic	ARHGEF16						12	93007072	T	intergenic	LINC02397(dist=129349),C12orf74(dist=89547)
1	3380057	A	exonic	ARHGEF16						12	93007439	G	intergenic	LINC02397(dist=129716),C12orf74(dist=89180)
1	3380337	A	intronic	ARHGEF16						12	93010050	T	intergenic	LINC02397(dist=132327),C12orf74(dist=86569)
1	3380505	A	intronic	ARHGEF16						12	93011711	G	intergenic	LINC02397(dist=133988),C12orf74(dist=84908)
1	3381698	A	intronic	ARHGEF16						12	93013766	C	intergenic	LINC02397(dist=136043),C12orf74(dist=82853)
1	3382330	C	intronic	ARHGEF16						12	93014321	T	intergenic	LINC02397(dist=136598),C12orf74(dist=82298)
1	3384052	T	intronic	ARHGEF16						12	93015361	G	intergenic	LINC02397(dist=137638),C12orf74(dist=81258)
1	3385225	C	intronic	ARHGEF16						12	93015459	A	intergenic	LINC02397(dist=137736),C12orf74(dist=81160)
1	3387660	A	intronic	ARHGEF16						12	93017492	T	intergenic	LINC02397(dist=139769),C12orf74(dist=79127)
1	3389757	G	exonic	ARHGEF16						12	93019108	A	intergenic	LINC02397(dist=141385),C12orf74(dist=77511)
1	3390219	T	intronic	ARHGEF16						12	93020210	G	intergenic	LINC02397(dist=142487),C12orf74(dist=76409)
1	3393242	G	intronic	ARHGEF16						12	93020252	G	intergenic	LINC02397(dist=142529),C12orf74(dist=76367)
1	3394121	T	intronic	ARHGEF16						12	93020494	T	intergenic	LINC02397(dist=142771),C12orf74(dist=76125)
1	3395388	G	intronic	ARHGEF16						12	93021674	T	intergenic	LINC02397(dist=143951),C12orf74(dist=74945)
1	3397062	A	exonic	ARHGEF16						12	93021845	A	intergenic	LINC02397(dist=144122),C12orf74(dist=74774)
1	3397836	A	downstream	ARHGEF16(dist=159)						12	93038987	A	intergenic	LINC02397(dist=161264),C12orf74(dist=57632)
1	3400294	T	intergenic	ARHGEF16(dist=2617),MEGF6(dist=4221)						12	93041826	G	intergenic	LINC02397(dist=164103),C12orf74(dist=54793)
1	3403400	G	intergenic	ARHGEF16(dist=5723),MEGF6(dist=1115)						12	93042891	A	intergenic	LINC02397(dist=165168),C12orf74(dist=53728)
1	3404201	A	downstream	MEGF6(dist=314)						12	93045325	A	intergenic	LINC02397(dist=167602),C12orf74(dist=51294)
1	3404227	T	downstream	MEGF6(dist=288)						12	93046539	T	intergenic	LINC02397(dist=168816),C12orf74(dist=50080)
1	3404359	C	downstream	MEGF6(dist=156)						12	93047951	G	intergenic	LINC02397(dist=170228),C12orf74(dist=48668)
1	3404710	G	UTR3	MEGF6(NM_001409:c.*2382C>0)						12	93053414	T	intergenic	LINC02397(dist=175691),C12orf74(dist=43205)
1	3404818	A	UTR3	MEGF6(NM_001409:c.*2274T>0)						12	93057462	T	intergenic	LINC02397(dist=179739),C12orf74(dist=39157)
1	3405137	G	UTR3	MEGF6(NM_001409:c.*1955C>0)						12	93057929	C	intergenic	LINC02397(dist=180206),C12orf74(dist=38690)
1	3405296	C	UTR3	MEGF6(NM_001409:c.*1796G>0)						12	93060715	T	intergenic	LINC02397(dist=182992),C12orf74(dist=35904)
1	3406197	T	UTR3	MEGF6(NM_001409:c.*895A>0)						12	93060958	T	intergenic	LINC02397(dist=183235),C12orf74(dist=35661)
1	3406751	A	UTR3	MEGF6(NM_001409:c.*341T>0)						12	93062061	T	intergenic	LINC02397(dist=184338),C12orf74(dist=34558)
1	3406791	G	UTR3	MEGF6(NM_001409:c.*301C>0)						12	93062786	A	intergenic	LINC02397(dist=185063),C12orf74(dist=33833)
1	3407007	A	UTR3	MEGF6(NM_001409:c.*85T>0)						12	93063650	A	intergenic	LINC02397(dist=185927),C12orf74(dist=32969)
1	3407043	T	UTR3	MEGF6(NM_001409:c.*49A>0)						12	93064750	G	intergenic	LINC02397(dist=187027),C12orf74(dist=31869)
1	3407367	A	intronic	MEGF6						12	93065021	T	intergenic	LINC02397(dist=187298),C12orf74(dist=31598)
1	3407556	T	intronic	MEGF6						12	93065254	A	intergenic	LINC02397(dist=187531),C12orf74(dist=31365)
1	3407680	A	intronic	MEGF6						12	93065676	T	intergenic	LINC02397(dist=187953),C12orf74(dist=30943)
1	3407999	T	intronic	MEGF6						12	93067870	C	intergenic	LINC02397(dist=190147),C12orf74(dist=28749)
1	3408183	T	intronic	MEGF6						12	93067905	T	intergenic	LINC02397(dist=190182),C12orf74(dist=28714)
1	3408557	T	intronic	MEGF6						12	93068075	A	intergenic	LINC02397(dist=190352),C12orf74(dist=28544)
1	3410221	G	intronic	MEGF6						12	93069701	G	intergenic	LINC02397(dist=191978),C12orf74(dist=26918)
1	3410223	G	intronic	MEGF6						12	93070809	T	intergenic	LINC02397(dist=193086),C12orf74(dist=25810)
1	3410410	T	exonic	MEGF6						12	93070936	A	intergenic	LINC02397(dist=193213),C12orf74(dist=25683)
1	3410581	A	exonic	MEGF6						12	93071971	T	intergenic	LINC02397(dist=194248),C12orf74(dist=24648)
1	3410644	G	exonic	MEGF6						12	93078029	A	intergenic	LINC02397(dist=200306),C12orf74(dist=18590)
1	3410935	A	exonic	MEGF6						12	93080839	T	intergenic	LINC02397(dist=203116),C12orf74(dist=15780)
1	3410942	A	exonic	MEGF6						12	93080898	C	intergenic	LINC02397(dist=203175),C12orf74(dist=15721)
1	3410973	T	exonic	MEGF6						12	93081207	A	intergenic	LINC02397(dist=203484),C12orf74(dist=15412)
1	3411038	A	exonic	MEGF6						12	93083990	T	intergenic	LINC02397(dist=206267),C12orf74(dist=12629)
1	3411184	A	exonic	MEGF6						12	93084997	T	intergenic	LINC02397(dist=207274),C12orf74(dist=11622)
1	3411367	C	intronic	MEGF6						12	93086429	C	intergenic	LINC02397(dist=208706),C12orf74(dist=10190)
1	3411396	C	intronic	MEGF6						12	93086550	C	intergenic	LINC02397(dist=208827),C12orf74(dist=10069)
1	3411413	T	intronic	MEGF6						12	93090255	C	intergenic	LINC02397(dist=212532),C12orf74(dist=6364)
1	3411561	A	intronic	MEGF6						12	93090761	T	intergenic	LINC02397(dist=213038),C12orf74(dist=5858)
1	3411563	A	intronic	MEGF6						12	93091046	A	intergenic	LINC02397(dist=213323),C12orf74(dist=5573)
1	3411573	T	intronic	MEGF6						12	93092039	A	intergenic	LINC02397(dist=214316),C12orf74(dist=4580)
1	3411613	A	intronic	MEGF6						12	93092717	T	intergenic	LINC02397(dist=214994),C12orf74(dist=3902)
1	3411652	A	intronic	MEGF6						12	93094624	G	intergenic	LINC02397(dist=216901),C12orf74(dist=1995)
1	3412254	A	intronic	MEGF6						12	93094911	C	intergenic	LINC02397(dist=217188),C12orf74(dist=1708)
1	3412418	A	intronic	MEGF6						12	93095207	T	intergenic	LINC02397(dist=217484),C12orf74(dist=1412)
1	3412644	A	intronic	MEGF6						12	93095303	T	intergenic	LINC02397(dist=217580),C12orf74(dist=1316)
1	3412726	T	intronic	MEGF6						12	93097367	A	intronic	C12orf74
1	3412908	A	intronic	MEGF6						12	93099712	A	intronic	C12orf74
1	3412993	A	intronic	MEGF6						12	93100017	G	intronic	C12orf74
1	3413153	A	intronic	MEGF6						12	93100366	A	UTR5	C12orf74(NM_001037671:c.-42A>0,NM_001178097:c.-42A>0)
1	3413514	G	intronic	MEGF6						12	93100593	A	exonic	C12orf74
1	3415357	T	exonic	MEGF6						12	93100895	A	exonic	C12orf74
1	3416227	T	exonic	MEGF6						12	93101873	T	UTR3	C12orf74(NM_001037671:c.*382T>0,NM_001178097:c.*944T>0)
1	3416449	C	exonic	MEGF6						12	93103545	C	intergenic	C12orf74(dist=1220),PLEKHG7(dist=26720)
1	3417211	A	exonic	MEGF6						12	93104319	T	intergenic	C12orf74(dist=1994),PLEKHG7(dist=25946)
1	3417545	G	exonic	MEGF6						12	93105038	C	intergenic	C12orf74(dist=2713),PLEKHG7(dist=25227)
1	3417622	A	exonic	MEGF6						12	93106481	T	intergenic	C12orf74(dist=4156),PLEKHG7(dist=23784)
1	3417998	A	intronic	MEGF6						12	93106860	A	intergenic	C12orf74(dist=4535),PLEKHG7(dist=23405)
1	3418794	C	intronic	MEGF6						12	93107050	T	intergenic	C12orf74(dist=4725),PLEKHG7(dist=23215)
1	3421586	T	intronic	MEGF6						12	93107201	C	intergenic	C12orf74(dist=4876),PLEKHG7(dist=23064)
1	3423467	T	intronic	MEGF6						12	93107288	G	intergenic	C12orf74(dist=4963),PLEKHG7(dist=22977)
1	3423742	A	intronic	MEGF6						12	93108219	C	intergenic	C12orf74(dist=5894),PLEKHG7(dist=22046)
1	3424388	A	exonic	MEGF6						12	93108276	G	intergenic	C12orf74(dist=5951),PLEKHG7(dist=21989)
1	3426693	G	intronic	MEGF6						12	93108963	A	intergenic	C12orf74(dist=6638),PLEKHG7(dist=21302)
1	3426796	T	intronic	MEGF6						12	93109420	G	intergenic	C12orf74(dist=7095),PLEKHG7(dist=20845)
1	3427298	A	intronic	MEGF6						12	93109635	T	intergenic	C12orf74(dist=7310),PLEKHG7(dist=20630)
1	3427351	G	exonic	MEGF6						12	93110484	A	intergenic	C12orf74(dist=8159),PLEKHG7(dist=19781)
1	3427485	A	intronic	MEGF6						12	93111265	A	intergenic	C12orf74(dist=8940),PLEKHG7(dist=19000)
1	3428608	A	exonic	MEGF6						12	93111326	C	intergenic	C12orf74(dist=9001),PLEKHG7(dist=18939)
1	3428747	C	intronic	MEGF6						12	93111554	G	intergenic	C12orf74(dist=9229),PLEKHG7(dist=18711)
1	3429695	A	intronic	MEGF6						12	93111610	A	intergenic	C12orf74(dist=9285),PLEKHG7(dist=18655)
1	3431168	A	exonic	MEGF6						12	93111671	T	intergenic	C12orf74(dist=9346),PLEKHG7(dist=18594)
1	3431235	C	exonic	MEGF6						12	93112386	A	intergenic	C12orf74(dist=10061),PLEKHG7(dist=17879)
1	3431318	A	intronic	MEGF6						12	93112585	A	intergenic	C12orf74(dist=10260),PLEKHG7(dist=17680)
1	3431441	A	intronic	MEGF6						12	93113245	G	intergenic	C12orf74(dist=10920),PLEKHG7(dist=17020)
1	3431555	T	intronic	MEGF6						12	93113850	G	intergenic	C12orf74(dist=11525),PLEKHG7(dist=16415)
1	3432598	C	intronic	MEGF6						12	93113851	A	intergenic	C12orf74(dist=11526),PLEKHG7(dist=16414)
1	3433567	T	intronic	MEGF6						12	93114432	A	intergenic	C12orf74(dist=12107),PLEKHG7(dist=15833)
1	3434110	A	intronic	MEGF6						12	93115266	T	intergenic	C12orf74(dist=12941),PLEKHG7(dist=14999)
1	3434123	A	intronic	MEGF6						12	93116007	T	intergenic	C12orf74(dist=13682),PLEKHG7(dist=14258)
1	3435383	C	intronic	MEGF6						12	93119095	T	intergenic	C12orf74(dist=16770),PLEKHG7(dist=11170)
1	3436880	A	intronic	MEGF6						12	93121505	T	intergenic	C12orf74(dist=19180),PLEKHG7(dist=8760)
1	3437014	A	intronic	MEGF6						12	93121658	T	intergenic	C12orf74(dist=19333),PLEKHG7(dist=8607)
1	3438049	T	intronic	MEGF6						12	93124137	G	intergenic	C12orf74(dist=21812),PLEKHG7(dist=6128)
1	3438670	T	intronic	MEGF6						12	93125698	C	intergenic	C12orf74(dist=23373),PLEKHG7(dist=4567)
1	3439257	G	intronic	MEGF6						12	93127165	C	intergenic	C12orf74(dist=24840),PLEKHG7(dist=3100)
1	3440390	T	intronic	MEGF6						12	93132633	T	intronic	PLEKHG7
1	3440445	A	intronic	MEGF6						12	93134076	G	intronic	PLEKHG7
1	3440753	A	exonic	MEGF6						12	93138095	A	intronic	PLEKHG7
1	3441264	A	intronic	MEGF6						12	93138505	A	intronic	PLEKHG7
1	3441702	T	intronic	MEGF6						12	93139005	C	intronic	PLEKHG7
1	3443102	G	intronic	MEGF6						12	93139348	G	exonic	PLEKHG7
1	3445286	C	intronic	MEGF6						12	93141248	C	intronic	PLEKHG7
1	3445408	T	intronic	MEGF6						12	93141662	A	intronic	PLEKHG7
1	3446250	A	intronic	MEGF6						12	93142329	C	intronic	PLEKHG7
1	3447278	A	intronic	MEGF6						12	93143908	T	intronic	PLEKHG7
1	3448489	T	intronic	MEGF6						12	93146181	A	intronic	PLEKHG7
1	3448677	A	intronic	MEGF6						12	93146237	A	intronic	PLEKHG7
1	3448727	C	intronic	MEGF6						12	93146285	A	intronic	PLEKHG7
1	3448809	A	intronic	MEGF6						12	93146379	A	intronic	PLEKHG7
1	3449078	A	intronic	MEGF6						12	93146829	G	intronic	PLEKHG7
1	3450097	G	intronic	MEGF6						12	93147053	A	intronic	PLEKHG7
1	3450274	T	intronic	MEGF6						12	93147436	T	intronic	PLEKHG7
1	3450286	A	intronic	MEGF6						12	93147563	G	intronic	PLEKHG7
1	3450985	C	intronic	MEGF6						12	93147808	G	intronic	PLEKHG7
1	3453022	G	intronic	MEGF6						12	93148520	A	intronic	PLEKHG7
1	3453046	G	intronic	MEGF6						12	93150102	T	exonic	PLEKHG7
1	3453309	T	intronic	MEGF6						12	93150524	T	intronic	PLEKHG7
1	3453592	T	intronic	MEGF6						12	93152115	A	intronic	PLEKHG7
1	3454302	T	intronic	MEGF6						12	93160220	C	intronic	PLEKHG7
1	3455490	A	intronic	MEGF6						12	93163262	C	intronic	PLEKHG7
1	3455757	A	intronic	MEGF6						12	93164006	C	UTR3	PLEKHG7(NM_001004330:c.*35C>0)
1	3456483	C	intronic	MEGF6						12	93164892	T	UTR3	EEA1(NM_003566:c.*4895A>0),PLEKHG7(NM_001004330:c.*921T>0)
1	3494695	T	intronic	MEGF6						12	93164936	A	UTR3	EEA1(NM_003566:c.*4851T>0),PLEKHG7(NM_001004330:c.*965A>0)
1	3495487	A	intronic	MEGF6						12	93165619	T	UTR3	EEA1(NM_003566:c.*4168A>0),PLEKHG7(NM_001004330:c.*1648T>0)
1	3496479	T	exonic	MEGF6						12	93168929	T	UTR3	EEA1(NM_003566:c.*858A>0)
1	3508920	T	intronic	MEGF6						12	93169124	A	UTR3	EEA1(NM_003566:c.*663T>0)
1	3511934	G	exonic	MEGF6						12	93175113	G	intronic	EEA1
1	3545592	A	UTR3	TPRG1L(NM_182752:c.*425A>0)						12	93175790	A	exonic	EEA1
1	3546935	A	downstream	TPRG1L,WRAP73(dist=399)						12	93177523	T	intronic	EEA1
1	3548122	A	exonic	WRAP73						12	93179874	C	intronic	EEA1
1	3548832	C	exonic	WRAP73						12	93180746	G	intronic	EEA1
1	3554770	A	intronic	WRAP73						12	93181063	G	intronic	EEA1
1	3567140	G	upstream	WRAP73(dist=473)						12	93181768	A	exonic	EEA1
1	3567630	C	upstream	WRAP73(dist=963)						12	93183560	T	intronic	EEA1
1	3638994	A	intronic	TP73						12	93184123	A	intronic	EEA1
1	3641082	A	intronic	TP73						12	93184862	T	intronic	EEA1
1	3641413	C	intronic	TP73						12	93189057	A	intronic	EEA1
1	3644715	T	exonic	TP73						12	93189142	A	intronic	EEA1
1	3644754	C	exonic	TP73						12	93191052	G	intronic	EEA1
1	3645208	G	intronic	TP73						12	93195981	A	intronic	EEA1
1	3645281	A	intronic	TP73						12	93196194	T	exonic	EEA1
1	3648345	A	intronic	TP73						12	93196332	T	exonic	EEA1
1	3649403	A	exonic	TP73						12	93196422	T	exonic	EEA1
1	3649562	A	exonic	TP73						12	93198102	G	intronic	EEA1
1	3649794	C	UTR3	TP73(NM_001204184:c.*468C>0,NM_005427:c.*151C>0,NM_001204185:c.*485C>0,NM_001204186:c.*468C>0,NM_001204187:c.*151C>0,NM_001204188:c.*151C>0,NM_001204190:c.*151C>0,NM_001204189:c.*468C>0,NM_001204191:c.*151C>0,NM_001126241:c.*468C>0,NM_001126240:c.*151C>0,NM_001126242:c.*485C>0,NM_001204192:c.*151C>0)						12	93198173	G	intronic	EEA1
1	3649805	G	UTR3	TP73(NM_001204184:c.*479G>0,NM_005427:c.*162G>0,NM_001204185:c.*496G>0,NM_001204186:c.*479G>0,NM_001204187:c.*162G>0,NM_001204188:c.*162G>0,NM_001204190:c.*162G>0,NM_001204189:c.*479G>0,NM_001204191:c.*162G>0,NM_001126241:c.*479G>0,NM_001126240:c.*162G>0,NM_001126242:c.*496G>0,NM_001204192:c.*162G>0)						12	93201015	T	intronic	EEA1
1	3651031	T	UTR3	TP73(NM_001204184:c.*1705T>0,NM_005427:c.*1388T>0,NM_001204185:c.*1722T>0,NM_001204186:c.*1705T>0,NM_001204187:c.*1388T>0,NM_001204188:c.*1388T>0,NM_001204190:c.*1388T>0,NM_001204189:c.*1705T>0,NM_001204191:c.*1388T>0,NM_001126241:c.*1705T>0,NM_001126240:c.*1388T>0,NM_001126242:c.*1722T>0,NM_001204192:c.*1388T>0)						12	93202801	T	exonic	EEA1
1	3651317	T	UTR3	TP73(NM_001204184:c.*1991T>0,NM_005427:c.*1674T>0,NM_001204185:c.*2008T>0,NM_001204186:c.*1991T>0,NM_001204187:c.*1674T>0,NM_001204188:c.*1674T>0,NM_001204190:c.*1674T>0,NM_001204189:c.*1991T>0,NM_001204191:c.*1674T>0,NM_001126241:c.*1991T>0,NM_001126240:c.*1674T>0,NM_001126242:c.*2008T>0,NM_001204192:c.*1674T>0)						12	93206234	C	intronic	EEA1
1	3651409	A	UTR3	TP73(NM_001204184:c.*2083A>0,NM_005427:c.*1766A>0,NM_001204185:c.*2100A>0,NM_001204186:c.*2083A>0,NM_001204187:c.*1766A>0,NM_001204188:c.*1766A>0,NM_001204190:c.*1766A>0,NM_001204189:c.*2083A>0,NM_001204191:c.*1766A>0,NM_001126241:c.*2083A>0,NM_001126240:c.*1766A>0,NM_001126242:c.*2100A>0,NM_001204192:c.*1766A>0)						12	93210312	C	intronic	EEA1
1	3657783	T	ncRNA_intronic	TP73-AS1						12	93210332	G	intronic	EEA1
1	3658237	A	ncRNA_intronic	TP73-AS1						12	93210839	C	intronic	EEA1
1	3659657	A	ncRNA_exonic	TP73-AS1						12	93212382	A	intronic	EEA1
1	3659742	T	ncRNA_exonic	TP73-AS1						12	93214560	T	intronic	EEA1
1	3660341	G	ncRNA_intronic	TP73-AS1						12	93214648	T	intronic	EEA1
1	3660855	T	ncRNA_intronic	TP73-AS1						12	93216187	C	intronic	EEA1
1	3661013	A	ncRNA_intronic	TP73-AS1						12	93224299	A	intronic	EEA1
1	3661182	G	ncRNA_intronic	TP73-AS1						12	93224480	C	intronic	EEA1
1	3661249	G	ncRNA_intronic	TP73-AS1						12	93227303	G	intronic	EEA1
1	3662309	T	ncRNA_exonic	TP73-AS1						12	93228081	C	intronic	EEA1
1	3662845	G	ncRNA_exonic	TP73-AS1						12	93228091	G	intronic	EEA1
1	3663057	T	ncRNA_exonic	TP73-AS1						12	93228694	T	intronic	EEA1
1	3663641	T	ncRNA_exonic	TP73-AS1						12	93230276	C	intronic	EEA1
1	3664946	T	intergenic	TP73-AS1(dist=1009),CCDC27(dist=4068)						12	93232659	C	intronic	EEA1
1	3665867	T	intergenic	TP73-AS1(dist=1930),CCDC27(dist=3147)						12	93233131	A	intronic	EEA1
1	3666079	A	intergenic	TP73-AS1(dist=2142),CCDC27(dist=2935)						12	93234145	A	intronic	EEA1
1	3666638	C	intergenic	TP73-AS1(dist=2701),CCDC27(dist=2376)						12	93235486	A	intronic	EEA1
1	3668004	C	intergenic	TP73-AS1(dist=4067),CCDC27(dist=1010)						12	93236419	G	intronic	EEA1
1	3668213	C	upstream	CCDC27(dist=801)						12	93238083	C	intronic	EEA1
1	3668753	C	upstream	CCDC27(dist=261)						12	93243625	A	intronic	EEA1
1	3668781	T	upstream	CCDC27(dist=233)						12	93245979	A	exonic	EEA1
1	3669201	G	exonic	CCDC27						12	93248177	C	intronic	EEA1
1	3669205	G	exonic	CCDC27						12	93249366	G	intronic	EEA1
1	3669356	A	exonic	CCDC27						12	93250021	A	intronic	EEA1
1	3669500	G	intronic	CCDC27						12	93251311	T	intronic	EEA1
1	3669620	C	intronic	CCDC27						12	93251372	A	intronic	EEA1
1	3669864	C	intronic	CCDC27						12	93252891	C	intronic	EEA1
1	3670691	G	exonic	CCDC27						12	93258139	G	intronic	EEA1
1	3670712	A	exonic	CCDC27						12	93258498	G	intronic	EEA1
1	3670946	T	intronic	CCDC27						12	93258618	C	intronic	EEA1
1	3672156	A	intronic	CCDC27						12	93262618	A	intronic	EEA1
1	3673003	T	intronic	CCDC27						12	93266356	A	intronic	EEA1
1	3673496	G	intronic	CCDC27						12	93267881	C	intronic	EEA1
1	3673641	T	intronic	CCDC27						12	93272875	A	intronic	EEA1
1	3674002	G	intronic	CCDC27						12	93274001	T	intronic	EEA1
1	3674152	T	intronic	CCDC27						12	93275693	T	intronic	EEA1
1	3674306	A	intronic	CCDC27						12	93276197	T	intronic	EEA1
1	3674778	G	intronic	CCDC27						12	93278298	G	intronic	EEA1
1	3675837	G	intronic	CCDC27						12	93281287	G	intronic	EEA1
1	3675959	G	intronic	CCDC27						12	93282078	T	intronic	EEA1
1	3676077	T	intronic	CCDC27						12	93286214	C	intronic	EEA1
1	3676772	C	intronic	CCDC27						12	93290502	A	intronic	EEA1
1	3676868	T	intronic	CCDC27						12	93299795	A	intronic	EEA1
1	3677579	A	intronic	CCDC27						12	93316049	C	intronic	EEA1
1	3677818	A	intronic	CCDC27						12	93316846	A	intronic	EEA1
1	3677854	T	exonic	CCDC27						12	93348752	T	intergenic	EEA1(dist=25681),LOC643339(dist=48782)
1	3677933	C	exonic	CCDC27						12	93350608	T	intergenic	EEA1(dist=27537),LOC643339(dist=46926)
1	3678128	A	intronic	CCDC27						12	93351486	C	intergenic	EEA1(dist=28415),LOC643339(dist=46048)
1	3678231	G	intronic	CCDC27						12	93351637	T	intergenic	EEA1(dist=28566),LOC643339(dist=45897)
1	3678511	G	intronic	CCDC27						12	93351788	C	intergenic	EEA1(dist=28717),LOC643339(dist=45746)
1	3678736	A	intronic	CCDC27						12	93352318	G	intergenic	EEA1(dist=29247),LOC643339(dist=45216)
1	3678849	C	intronic	CCDC27						12	93352786	A	intergenic	EEA1(dist=29715),LOC643339(dist=44748)
1	3678898	G	intronic	CCDC27						12	93353864	A	intergenic	EEA1(dist=30793),LOC643339(dist=43670)
1	3679146	A	intronic	CCDC27						12	93353874	T	intergenic	EEA1(dist=30803),LOC643339(dist=43660)
1	3679307	C	intronic	CCDC27						12	93354442	A	intergenic	EEA1(dist=31371),LOC643339(dist=43092)
1	3679461	T	intronic	CCDC27						12	93354781	T	intergenic	EEA1(dist=31710),LOC643339(dist=42753)
1	3679541	C	intronic	CCDC27						12	93355018	G	intergenic	EEA1(dist=31947),LOC643339(dist=42516)
1	3679775	T	exonic	CCDC27						12	93355193	T	intergenic	EEA1(dist=32122),LOC643339(dist=42341)
1	3679783	C	exonic	CCDC27						12	93355440	C	intergenic	EEA1(dist=32369),LOC643339(dist=42094)
1	3680345	T	exonic	CCDC27						12	93355607	A	intergenic	EEA1(dist=32536),LOC643339(dist=41927)
1	3681831	C	intronic	CCDC27						12	93355884	C	intergenic	EEA1(dist=32813),LOC643339(dist=41650)
1	3683159	C	exonic	CCDC27						12	93356106	G	intergenic	EEA1(dist=33035),LOC643339(dist=41428)
1	3684939	A	intronic	CCDC27						12	93356877	T	intergenic	EEA1(dist=33806),LOC643339(dist=40657)
1	3689408	A	intronic	SMIM1						12	93357070	A	intergenic	EEA1(dist=33999),LOC643339(dist=40464)
1	3689889	A	intronic	SMIM1						12	93357353	C	intergenic	EEA1(dist=34282),LOC643339(dist=40181)
1	3691592	A	intronic	SMIM1						12	93357514	A	intergenic	EEA1(dist=34443),LOC643339(dist=40020)
1	3692799	G	downstream	SMIM1(dist=253)						12	93358277	A	intergenic	EEA1(dist=35206),LOC643339(dist=39257)
1	3693110	A	downstream	SMIM1(dist=564)						12	93360036	A	intergenic	EEA1(dist=36965),LOC643339(dist=37498)
1	3693730	T	intergenic	SMIM1(dist=1184),LRRC47(dist=1393)						12	93360450	T	intergenic	EEA1(dist=37379),LOC643339(dist=37084)
1	3693752	C	intergenic	SMIM1(dist=1206),LRRC47(dist=1371)						12	93360485	T	intergenic	EEA1(dist=37414),LOC643339(dist=37049)
1	3697663	T	exonic	LRRC47						12	93360503	C	intergenic	EEA1(dist=37432),LOC643339(dist=37031)
1	3697669	G	exonic	LRRC47						12	93360562	T	intergenic	EEA1(dist=37491),LOC643339(dist=36972)
1	3700216	T	intronic	LRRC47						12	93360738	A	intergenic	EEA1(dist=37667),LOC643339(dist=36796)
1	3703589	T	exonic	LRRC47						12	93360761	C	intergenic	EEA1(dist=37690),LOC643339(dist=36773)
1	3705115	T	intronic	LRRC47						12	93361585	G	intergenic	EEA1(dist=38514),LOC643339(dist=35949)
1	3705211	G	intronic	LRRC47						12	93362038	A	intergenic	EEA1(dist=38967),LOC643339(dist=35496)
1	3705551	T	intronic	LRRC47						12	93363575	C	intergenic	EEA1(dist=40504),LOC643339(dist=33959)
1	3710179	A	intronic	LRRC47						12	93363665	T	intergenic	EEA1(dist=40594),LOC643339(dist=33869)
1	3710957	T	intronic	LRRC47						12	93363995	T	intergenic	EEA1(dist=40924),LOC643339(dist=33539)
1	3713073	G	upstream	LRRC47(dist=11)						12	93364375	A	intergenic	EEA1(dist=41304),LOC643339(dist=33159)
1	3715931	T	intergenic	LRRC47(dist=2869),CEP104(dist=12720)						12	93364391	G	intergenic	EEA1(dist=41320),LOC643339(dist=33143)
1	3716077	C	intergenic	LRRC47(dist=3015),CEP104(dist=12574)						12	93365370	C	intergenic	EEA1(dist=42299),LOC643339(dist=32164)
1	3717404	A	intergenic	LRRC47(dist=4342),CEP104(dist=11247)						12	93365678	G	intergenic	EEA1(dist=42607),LOC643339(dist=31856)
1	3719797	C	intergenic	LRRC47(dist=6735),CEP104(dist=8854)						12	93365983	A	intergenic	EEA1(dist=42912),LOC643339(dist=31551)
1	3721318	A	intergenic	LRRC47(dist=8256),CEP104(dist=7333)						12	93366773	T	intergenic	EEA1(dist=43702),LOC643339(dist=30761)
1	3722985	T	intergenic	LRRC47(dist=9923),CEP104(dist=5666)						12	93367042	A	intergenic	EEA1(dist=43971),LOC643339(dist=30492)
1	3724615	A	intergenic	LRRC47(dist=11553),CEP104(dist=4036)						12	93367172	T	intergenic	EEA1(dist=44101),LOC643339(dist=30362)
1	3724901	T	intergenic	LRRC47(dist=11839),CEP104(dist=3750)						12	93368073	A	intergenic	EEA1(dist=45002),LOC643339(dist=29461)
1	3725196	T	intergenic	LRRC47(dist=12134),CEP104(dist=3455)						12	93369052	C	intergenic	EEA1(dist=45981),LOC643339(dist=28482)
1	3728103	A	downstream	CEP104(dist=548)						12	93369613	T	intergenic	EEA1(dist=46542),LOC643339(dist=27921)
1	3738583	T	intronic	CEP104						12	93370419	A	intergenic	EEA1(dist=47348),LOC643339(dist=27115)
1	3739512	A	intronic	CEP104						12	93370614	G	intergenic	EEA1(dist=47543),LOC643339(dist=26920)
1	3742009	T	intronic	CEP104						12	93373064	A	intergenic	EEA1(dist=49993),LOC643339(dist=24470)
1	3742103	T	intronic	CEP104						12	93373171	T	intergenic	EEA1(dist=50100),LOC643339(dist=24363)
1	3742560	A	intronic	CEP104						12	93374592	G	intergenic	EEA1(dist=51521),LOC643339(dist=22942)
1	3745924	A	exonic	CEP104						12	93376839	T	intergenic	EEA1(dist=53768),LOC643339(dist=20695)
1	3746432	A	exonic	CEP104						12	93376874	A	intergenic	EEA1(dist=53803),LOC643339(dist=20660)
1	3746819	T	intronic	CEP104						12	93377161	T	intergenic	EEA1(dist=54090),LOC643339(dist=20373)
1	3748462	A	intronic	CEP104						12	93377350	A	intergenic	EEA1(dist=54279),LOC643339(dist=20184)
1	3748900	G	intronic	CEP104						12	93377616	A	intergenic	EEA1(dist=54545),LOC643339(dist=19918)
1	3755965	T	intronic	CEP104						12	93378151	G	intergenic	EEA1(dist=55080),LOC643339(dist=19383)
1	3769303	C	intronic	CEP104						12	93378648	A	intergenic	EEA1(dist=55577),LOC643339(dist=18886)
1	3785891	T	intronic	DFFB						12	93379221	A	intergenic	EEA1(dist=56150),LOC643339(dist=18313)
1	3786245	A	exonic	DFFB						12	93379320	T	intergenic	EEA1(dist=56249),LOC643339(dist=18214)
1	3786576	G	intronic	DFFB						12	93379364	T	intergenic	EEA1(dist=56293),LOC643339(dist=18170)
1	3786745	T	intronic	DFFB						12	93379747	T	intergenic	EEA1(dist=56676),LOC643339(dist=17787)
1	3789989	T	intronic	DFFB						12	93380340	A	intergenic	EEA1(dist=57269),LOC643339(dist=17194)
1	3792310	T	intronic	DFFB						12	93380918	A	intergenic	EEA1(dist=57847),LOC643339(dist=16616)
1	3807312	T	exonic	C1orf174						12	93380939	G	intergenic	EEA1(dist=57868),LOC643339(dist=16595)
1	3807359	T	exonic	C1orf174						12	93381007	T	intergenic	EEA1(dist=57936),LOC643339(dist=16527)
1	3807590	T	exonic	C1orf174						12	93381268	A	intergenic	EEA1(dist=58197),LOC643339(dist=16266)
1	3807593	G	exonic	C1orf174						12	93381442	A	intergenic	EEA1(dist=58371),LOC643339(dist=16092)
1	3809520	T	exonic	C1orf174						12	93381866	A	intergenic	EEA1(dist=58795),LOC643339(dist=15668)
1	4004399	G	ncRNA_intronic	LINC01346						12	93381951	C	intergenic	EEA1(dist=58880),LOC643339(dist=15583)
1	4004813	C	ncRNA_intronic	LINC01346						12	93382925	A	intergenic	EEA1(dist=59854),LOC643339(dist=14609)
1	4006060	C	ncRNA_intronic	LINC01346						12	93383321	C	intergenic	EEA1(dist=60250),LOC643339(dist=14213)
1	4006367	C	ncRNA_intronic	LINC01346						12	93383467	G	intergenic	EEA1(dist=60396),LOC643339(dist=14067)
1	4006671	A	ncRNA_intronic	LINC01346						12	93384143	G	intergenic	EEA1(dist=61072),LOC643339(dist=13391)
1	4006788	T	ncRNA_intronic	LINC01346						12	93384269	G	intergenic	EEA1(dist=61198),LOC643339(dist=13265)
1	4007008	G	ncRNA_intronic	LINC01346						12	93384398	T	intergenic	EEA1(dist=61327),LOC643339(dist=13136)
1	4007110	G	ncRNA_intronic	LINC01346						12	93384554	G	intergenic	EEA1(dist=61483),LOC643339(dist=12980)
1	4008028	C	ncRNA_exonic	LINC01345						12	93384644	C	intergenic	EEA1(dist=61573),LOC643339(dist=12890)
1	4008052	A	ncRNA_exonic	LINC01345						12	93384826	A	intergenic	EEA1(dist=61755),LOC643339(dist=12708)
1	4033387	G	intergenic	LINC01346(dist=20744),LINC01777(dist=438724)						12	93385617	C	intergenic	EEA1(dist=62546),LOC643339(dist=11917)
1	4035255	C	intergenic	LINC01346(dist=22612),LINC01777(dist=436856)						12	93386460	G	intergenic	EEA1(dist=63389),LOC643339(dist=11074)
1	4035267	G	intergenic	LINC01346(dist=22624),LINC01777(dist=436844)						12	93386474	G	intergenic	EEA1(dist=63403),LOC643339(dist=11060)
1	4036413	G	intergenic	LINC01346(dist=23770),LINC01777(dist=435698)						12	93386516	C	intergenic	EEA1(dist=63445),LOC643339(dist=11018)
1	4036424	C	intergenic	LINC01346(dist=23781),LINC01777(dist=435687)						12	93386799	G	intergenic	EEA1(dist=63728),LOC643339(dist=10735)
1	4036823	G	intergenic	LINC01346(dist=24180),LINC01777(dist=435288)						12	93388090	A	intergenic	EEA1(dist=65019),LOC643339(dist=9444)
1	4037665	T	intergenic	LINC01346(dist=25022),LINC01777(dist=434446)						12	93388109	C	intergenic	EEA1(dist=65038),LOC643339(dist=9425)
1	4038877	T	intergenic	LINC01346(dist=26234),LINC01777(dist=433234)						12	93388525	A	intergenic	EEA1(dist=65454),LOC643339(dist=9009)
1	4039440	C	intergenic	LINC01346(dist=26797),LINC01777(dist=432671)						12	93392111	G	intergenic	EEA1(dist=69040),LOC643339(dist=5423)
1	4039833	C	intergenic	LINC01346(dist=27190),LINC01777(dist=432278)						12	93396550	C	downstream	LOC643339(dist=984)
1	4039896	C	intergenic	LINC01346(dist=27253),LINC01777(dist=432215)						12	93398302	C	ncRNA_exonic	LOC643339
1	4043516	A	intergenic	LINC01346(dist=30873),LINC01777(dist=428595)						12	93406031	C	ncRNA_intronic	LOC643339
1	4049980	C	intergenic	LINC01346(dist=37337),LINC01777(dist=422131)						12	93407155	G	ncRNA_intronic	LOC643339
1	4051249	T	intergenic	LINC01346(dist=38606),LINC01777(dist=420862)						12	93407743	T	ncRNA_intronic	LOC643339
1	4054067	C	intergenic	LINC01346(dist=41424),LINC01777(dist=418044)						12	93410353	G	ncRNA_intronic	LOC643339
1	4363735	C	intergenic	LINC01346(dist=351092),LINC01777(dist=108376)						12	93410729	C	ncRNA_intronic	LOC643339
1	4517024	A	intergenic	LINC01777(dist=32280),LINC01646(dist=114523)						12	93411688	A	ncRNA_intronic	LOC643339
1	4517334	T	intergenic	LINC01777(dist=32590),LINC01646(dist=114213)						12	93423727	A	ncRNA_intronic	LOC643339
1	4520502	T	intergenic	LINC01777(dist=35758),LINC01646(dist=111045)						12	93425925	A	ncRNA_intronic	LOC643339
1	4522798	T	intergenic	LINC01777(dist=38054),LINC01646(dist=108749)						12	93431547	T	ncRNA_intronic	LOC643339
1	4523324	A	intergenic	LINC01777(dist=38580),LINC01646(dist=108223)						12	93431978	A	ncRNA_intronic	LOC643339
1	4524335	A	intergenic	LINC01777(dist=39591),LINC01646(dist=107212)						12	93433649	A	ncRNA_intronic	LOC643339
1	4526751	T	intergenic	LINC01777(dist=42007),LINC01646(dist=104796)						12	93434240	G	ncRNA_intronic	LOC643339
1	4527463	A	intergenic	LINC01777(dist=42719),LINC01646(dist=104084)						12	93438171	T	ncRNA_intronic	LOC643339
1	4533838	A	intergenic	LINC01777(dist=49094),LINC01646(dist=97709)						12	93438191	T	ncRNA_intronic	LOC643339
1	4534901	A	intergenic	LINC01777(dist=50157),LINC01646(dist=96646)						12	93438288	A	ncRNA_intronic	LOC643339
1	4541043	A	intergenic	LINC01777(dist=56299),LINC01646(dist=90504)						12	93440945	G	ncRNA_intronic	LOC643339
1	4541390	C	intergenic	LINC01777(dist=56646),LINC01646(dist=90157)						12	93441418	T	ncRNA_intronic	LOC643339
1	4541444	A	intergenic	LINC01777(dist=56700),LINC01646(dist=90103)						12	93442028	A	ncRNA_intronic	LOC643339
1	4541724	C	intergenic	LINC01777(dist=56980),LINC01646(dist=89823)						12	93443775	T	ncRNA_intronic	LOC643339
1	4541735	T	intergenic	LINC01777(dist=56991),LINC01646(dist=89812)						12	93445539	G	ncRNA_intronic	LOC643339
1	4541755	A	intergenic	LINC01777(dist=57011),LINC01646(dist=89792)						12	93445596	C	ncRNA_intronic	LOC643339
1	4614822	C	intergenic	LINC01777(dist=130078),LINC01646(dist=16725)						12	93447320	A	ncRNA_intronic	LOC643339
1	4772717	G	exonic	AJAP1						12	93448428	A	ncRNA_intronic	LOC643339
1	4829963	G	exonic	AJAP1						12	93449477	G	ncRNA_intronic	LOC643339
1	4955862	C	intergenic	AJAP1(dist=103280),MIR4689(dist=966870)						12	93451002	A	ncRNA_intronic	LOC643339
1	4956555	G	intergenic	AJAP1(dist=103973),MIR4689(dist=966177)						12	93451021	C	ncRNA_intronic	LOC643339
1	5166666	A	intergenic	AJAP1(dist=314084),MIR4689(dist=756066)						12	93452199	G	ncRNA_intronic	LOC643339
1	5166991	G	intergenic	AJAP1(dist=314409),MIR4689(dist=755741)						12	93452789	G	ncRNA_intronic	LOC643339
1	5167890	T	intergenic	AJAP1(dist=315308),MIR4689(dist=754842)						12	93458232	A	ncRNA_intronic	LOC643339
1	5168571	T	intergenic	AJAP1(dist=315989),MIR4689(dist=754161)						12	93478349	C	ncRNA_intronic	LOC643339
1	5170712	G	intergenic	AJAP1(dist=318130),MIR4689(dist=752020)						12	93535829	T	ncRNA_intronic	LOC643339
1	5347155	T	intergenic	AJAP1(dist=494573),MIR4689(dist=575577)						12	93539884	G	ncRNA_intronic	LOC643339
1	5709228	A	intergenic	AJAP1(dist=856646),MIR4689(dist=213504)						12	93541790	G	ncRNA_intronic	LOC643339
1	5709691	T	intergenic	AJAP1(dist=857109),MIR4689(dist=213041)						12	93543556	T	ncRNA_intronic	LOC643339
1	5711306	G	intergenic	AJAP1(dist=858724),MIR4689(dist=211426)						12	93550301	T	ncRNA_intronic	LOC643339
1	5711647	C	intergenic	AJAP1(dist=859065),MIR4689(dist=211085)						12	93550429	T	ncRNA_intronic	LOC643339
1	5713284	A	intergenic	AJAP1(dist=860702),MIR4689(dist=209448)						12	93550493	G	ncRNA_intronic	LOC643339
1	5713545	A	intergenic	AJAP1(dist=860963),MIR4689(dist=209187)						12	93551707	A	ncRNA_intronic	LOC643339
1	5715175	T	intergenic	AJAP1(dist=862593),MIR4689(dist=207557)						12	93553532	T	ncRNA_intronic	LOC643339
1	5716604	C	intergenic	AJAP1(dist=864022),MIR4689(dist=206128)						12	93553696	G	ncRNA_intronic	LOC643339
1	5716633	C	intergenic	AJAP1(dist=864051),MIR4689(dist=206099)						12	93554034	T	ncRNA_intronic	LOC643339
1	5716941	T	intergenic	AJAP1(dist=864359),MIR4689(dist=205791)						12	93557687	A	ncRNA_intronic	LOC643339
1	5717073	C	intergenic	AJAP1(dist=864491),MIR4689(dist=205659)						12	93746698	T	ncRNA_intronic	LOC643339
1	5717124	C	intergenic	AJAP1(dist=864542),MIR4689(dist=205608)						12	93747302	T	ncRNA_intronic	LOC643339
1	5717138	G	intergenic	AJAP1(dist=864556),MIR4689(dist=205594)						12	93747731	A	ncRNA_intronic	LOC643339
1	5717221	A	intergenic	AJAP1(dist=864639),MIR4689(dist=205511)						12	93748145	C	ncRNA_intronic	LOC643339
1	5717388	C	intergenic	AJAP1(dist=864806),MIR4689(dist=205344)						12	93749125	T	ncRNA_intronic	LOC643339
1	5717406	C	intergenic	AJAP1(dist=864824),MIR4689(dist=205326)						12	93749180	C	ncRNA_intronic	LOC643339
1	5717481	T	intergenic	AJAP1(dist=864899),MIR4689(dist=205251)						12	93751933	C	ncRNA_intronic	LOC643339
1	5717488	A	intergenic	AJAP1(dist=864906),MIR4689(dist=205244)						12	93751934	A	ncRNA_intronic	LOC643339
1	5717552	A	intergenic	AJAP1(dist=864970),MIR4689(dist=205180)						12	93756158	T	ncRNA_intronic	LOC643339
1	5717581	C	intergenic	AJAP1(dist=864999),MIR4689(dist=205151)						12	93761143	G	ncRNA_intronic	LOC643339
1	5717582	T	intergenic	AJAP1(dist=865000),MIR4689(dist=205150)						12	93763298	T	ncRNA_intronic	LOC643339
1	5717948	T	intergenic	AJAP1(dist=865366),MIR4689(dist=204784)						12	93768342	G	ncRNA_intronic	LOC643339
1	5718016	C	intergenic	AJAP1(dist=865434),MIR4689(dist=204716)						12	93773927	A	ncRNA_intronic	NUDT4P2
1	5718414	A	intergenic	AJAP1(dist=865832),MIR4689(dist=204318)						12	93775760	G	ncRNA_intronic	NUDT4P2
1	5718574	A	intergenic	AJAP1(dist=865992),MIR4689(dist=204158)						12	93776684	G	ncRNA_intronic	NUDT4P2
1	5718749	T	intergenic	AJAP1(dist=866167),MIR4689(dist=203983)						12	93776976	C	ncRNA_intronic	NUDT4P2
1	5719422	G	intergenic	AJAP1(dist=866840),MIR4689(dist=203310)						12	93785170	G	ncRNA_intronic	NUDT4P2
1	5720221	A	intergenic	AJAP1(dist=867639),MIR4689(dist=202511)						12	93787848	G	ncRNA_intronic	NUDT4P2
1	5721189	G	intergenic	AJAP1(dist=868607),MIR4689(dist=201543)						12	93788845	G	ncRNA_intronic	NUDT4P2
1	5721259	T	intergenic	AJAP1(dist=868677),MIR4689(dist=201473)						12	93846446	C	intergenic	UBE2N(dist=10723),MRPL42(dist=14844)
1	5723563	C	intergenic	AJAP1(dist=870981),MIR4689(dist=199169)						12	93853851	G	intergenic	UBE2N(dist=18128),MRPL42(dist=7439)
1	5723643	A	intergenic	AJAP1(dist=871061),MIR4689(dist=199089)						12	93855052	A	intergenic	UBE2N(dist=19329),MRPL42(dist=6238)
1	5736951	C	intergenic	AJAP1(dist=884369),MIR4689(dist=185781)						12	93858343	T	intergenic	UBE2N(dist=22620),MRPL42(dist=2947)
1	5765353	T	intergenic	AJAP1(dist=912771),MIR4689(dist=157379)						12	93859555	G	intergenic	UBE2N(dist=23832),MRPL42(dist=1735)
1	5772500	A	intergenic	AJAP1(dist=919918),MIR4689(dist=150232)						12	93859952	A	intergenic	UBE2N(dist=24229),MRPL42(dist=1338)
1	5776369	A	intergenic	AJAP1(dist=923787),MIR4689(dist=146363)						12	93860616	A	upstream	MRPL42(dist=674)
1	5827779	A	intergenic	AJAP1(dist=975197),MIR4689(dist=94953)						12	93860836	A	upstream	MRPL42(dist=454)
1	5856215	A	intergenic	AJAP1(dist=1003633),MIR4689(dist=66517)						12	93861253	T	upstream	MRPL42(dist=37)
1	5869920	G	intergenic	AJAP1(dist=1017338),MIR4689(dist=52812)						12	93861473	T	intronic	MRPL42
1	5882626	A	intergenic	AJAP1(dist=1030044),MIR4689(dist=40106)						12	93861601	T	intronic	MRPL42
1	5904580	A	intergenic	AJAP1(dist=1051998),MIR4689(dist=18152)						12	93862746	T	intronic	MRPL42
1	5906462	A	intergenic	AJAP1(dist=1053880),MIR4689(dist=16270)						12	93863162	C	intronic	MRPL42
1	5907249	T	intergenic	AJAP1(dist=1054667),MIR4689(dist=15483)						12	93863425	T	intronic	MRPL42
1	5914245	G	intergenic	AJAP1(dist=1061663),MIR4689(dist=8487)						12	93863895	A	intronic	MRPL42
1	5914281	A	intergenic	AJAP1(dist=1061699),MIR4689(dist=8451)						12	93864474	A	intronic	MRPL42
1	5914441	C	intergenic	AJAP1(dist=1061859),MIR4689(dist=8291)						12	93864832	T	intronic	MRPL42
1	5916437	C	intergenic	AJAP1(dist=1063855),MIR4689(dist=6295)						12	93865231	C	intronic	MRPL42
1	5916628	T	intergenic	AJAP1(dist=1064046),MIR4689(dist=6104)						12	93865325	C	intronic	MRPL42
1	5919525	A	intergenic	AJAP1(dist=1066943),MIR4689(dist=3207)						12	93865336	G	intronic	MRPL42
1	5921556	C	intergenic	AJAP1(dist=1068974),MIR4689(dist=1176)						12	93865572	G	intronic	MRPL42
1	5923427	T	exonic	NPHP4						12	93866106	C	intronic	MRPL42
1	5924270	C	intronic	NPHP4						12	93866134	A	intronic	MRPL42
1	5925955	C	intronic	NPHP4						12	93868044	T	intronic	MRPL42
1	5926503	A	exonic	NPHP4						12	93868767	A	intronic	MRPL42
1	5926752	T	intronic	NPHP4						12	93869439	A	intronic	MRPL42
1	5927169	A	exonic	NPHP4						12	93954065	T	intergenic	MRPL42(dist=44075),SOCS2-AS1(dist=5339)
1	5927943	A	exonic	NPHP4						12	93956672	T	intergenic	MRPL42(dist=46682),SOCS2-AS1(dist=2732)
1	5933335	T	exonic	NPHP4						12	93959918	C	ncRNA_intronic	SOCS2-AS1
1	5934887	T	intronic	NPHP4						12	93960917	C	ncRNA_exonic	SOCS2-AS1
1	5935064	C	exonic	NPHP4						12	93961110	T	ncRNA_intronic	SOCS2-AS1
1	5935162	A	splicing	NPHP4(NM_001291594:exon17:c.1282-2T>0,NM_015102:exon21:c.2818-2T>0,NM_001291593:exon18:c.1279-2T>0)						12	93961353	G	ncRNA_intronic	SOCS2-AS1
1	5938189	A	intronic	NPHP4						12	93962959	C	ncRNA_intronic	SOCS2-AS1
1	5939677	C	intronic	NPHP4						12	93963873	T	ncRNA_intronic	SOCS2-AS1
1	5940243	A	exonic	NPHP4						12	93967035	G	intronic	SOCS2
1	5942512	A	intronic	NPHP4						12	93967755	C	intronic	SOCS2
1	5950830	C	intronic	NPHP4						12	93968197	C	intronic	SOCS2
1	5951013	T	exonic	NPHP4						12	93968256	A	intronic	SOCS2
1	5953549	A	intronic	NPHP4						12	93968288	A	intronic	SOCS2
1	5953697	A	intronic	NPHP4						12	93970026	C	UTR3	SOCS2(NM_003877:c.*1071C>0,NM_001270467:c.*1071C>0,NM_001270468:c.*1071C>0,NM_001270470:c.*1071C>0,NM_001270469:c.*1071C>0,NM_001270471:c.*1071C>0)
1	5954641	C	intronic	NPHP4						12	93972927	A	intergenic	SOCS2(dist=2406),CRADD(dist=98220)
1	5955719	A	intronic	NPHP4						12	93972987	G	intergenic	SOCS2(dist=2466),CRADD(dist=98160)
1	5961681	G	intronic	NPHP4						12	93975208	A	intergenic	SOCS2(dist=4687),CRADD(dist=95939)
1	5963815	A	intronic	NPHP4						12	93976636	G	intergenic	SOCS2(dist=6115),CRADD(dist=94511)
1	5963917	C	intronic	NPHP4						12	93976703	T	intergenic	SOCS2(dist=6182),CRADD(dist=94444)
1	5964203	T	intronic	NPHP4						12	93976954	G	intergenic	SOCS2(dist=6433),CRADD(dist=94193)
1	5965455	T	exonic	NPHP4						12	93977465	A	intergenic	SOCS2(dist=6944),CRADD(dist=93682)
1	5965824	C	exonic	NPHP4						12	93977591	G	intergenic	SOCS2(dist=7070),CRADD(dist=93556)
1	5966661	G	intronic	NPHP4						12	93978504	T	intergenic	SOCS2(dist=7983),CRADD(dist=92643)
1	5969245	A	exonic	NPHP4						12	93979419	C	intergenic	SOCS2(dist=8898),CRADD(dist=91728)
1	5969462	G	intronic	NPHP4						12	93979892	G	intergenic	SOCS2(dist=9371),CRADD(dist=91255)
1	5969823	T	intronic	NPHP4						12	93980088	A	intergenic	SOCS2(dist=9567),CRADD(dist=91059)
1	5971412	A	intronic	NPHP4						12	93982332	A	intergenic	SOCS2(dist=11811),CRADD(dist=88815)
1	5972227	T	intronic	NPHP4						12	93983132	A	intergenic	SOCS2(dist=12611),CRADD(dist=88015)
1	5972546	T	intronic	NPHP4						12	93983554	T	intergenic	SOCS2(dist=13033),CRADD(dist=87593)
1	5972706	C	intronic	NPHP4						12	93983854	C	intergenic	SOCS2(dist=13333),CRADD(dist=87293)
1	5973281	T	intronic	NPHP4						12	93985482	C	intergenic	SOCS2(dist=14961),CRADD(dist=85665)
1	5974113	A	intronic	NPHP4						12	93988283	C	intergenic	SOCS2(dist=17762),CRADD(dist=82864)
1	5975998	A	intronic	NPHP4						12	93988384	A	intergenic	SOCS2(dist=17863),CRADD(dist=82763)
1	5976043	A	intronic	NPHP4						12	93989735	T	intergenic	SOCS2(dist=19214),CRADD(dist=81412)
1	5978107	A	intronic	NPHP4						12	93990553	G	intergenic	SOCS2(dist=20032),CRADD(dist=80594)
1	5978463	G	intronic	NPHP4						12	93993266	A	intergenic	SOCS2(dist=22745),CRADD(dist=77881)
1	5978977	T	intronic	NPHP4						12	93994827	C	intergenic	SOCS2(dist=24306),CRADD(dist=76320)
1	5979372	C	intronic	NPHP4						12	93996035	A	intergenic	SOCS2(dist=25514),CRADD(dist=75112)
[truncated: 1,046,576+ more rows]

## Sheet: S6-Supplementary Table 6
Table S6 | Number of cases and controls for each genotpe combination of two SNPs found in interaction analysis
	4:921733:C:A								4:951179:G:A								4:90705606:T:C
			A/A	A/C	C/C	*/*					G/G	G/A	A/A	*/*					C/C	C/T	T/T	*/*
4:906131:C:G	G/G	cases	0	3	600	603		4:939087:C:T	T/T	cases	577	118	5	700		4:90673770:A:G	A/A	cases	0	1	414	415
		controls	0	4	457	461				controls	434	116	7	557				controls	0	3	351	354
		total	0	7	1057	1064				total	1011	234	12	1257				total	0	4	765	769
	G/C	cases	0	892	1316	2208			T/C	cases	563	1559	157	2279			A/G	cases	0	139	1973	2112
		controls	4	933	1261	2198				controls	519	1592	175	2286				controls	0	125	1874	1999
		total	4	1825	2577	4406				total	1082	3151	332	4565				total	0	264	3847	4111
	C/C	cases	400	1092	860	2352			C/C	cases	181	845	1158	2184			G/G	cases	13	321	2302	2636
		controls	452	1288	971	2711				controls	205	986	1336	2527				controls	9	265	2743	3017
		total	852	2380	1831	5063				total	386	1831	2494	4711				total	22	586	5045	5653
	*/*	cases	400	1987	2776	5163			*/*	cases	1321	2522	1320	5163			*/*	cases	13	461	4689	5163
		controls	456	2225	2689	5370				controls	1158	2694	1518	5370				controls	9	393	4968	5370
		total	856	4212	5465	10533				total	2479	5216	2838	10533				total	22	854	9657	10533
	7:21758045:T:G								17:43548778:G:C								17:43892520:A:C
			G/G	G/T	T/T	*/*					G/G	G/C	C/C	*/*					A/A	A/C	C/C	*/*
7:21733475:G:A	A/A	cases	32	59	30	121		17:43543830:T:C	T/T	cases	416	0	0	416		17:43854655:G:C	C/C	cases	98	322	220	640
		controls	32	63	26	121				controls	396	0	0	396				controls	81	343	385	809
		total	64	122	56	242				total	812	0	0	812				total	179	665	605	1449
	A/G	cases	310	706	316	1332			T/C	cases	467	1667	0	2134			C/G	cases	289	1077	1020	2386
		controls	277	665	319	1261				controls	579	1473	1	2053				controls	219	1109	1173	2501
		total	587	1371	635	2593				total	1046	3140	1	4187				total	508	2186	2193	4887
	G/G	cases	660	1878	1172	3710			C/C	cases	132	925	1556	2613			G/G	cases	193	924	1020	2137
		controls	847	1952	1189	3988				controls	205	1138	1578	2921				controls	211	896	953	2060
		total	1507	3830	2361	7698				total	337	2063	3134	5534				total	404	1820	1973	4197
	*/*	cases	1002	2643	1518	5163			*/*	cases	1015	2592	1556	5163			*/*	cases	580	2323	2260	5163
		controls	1156	2680	1534	5370				controls	1180	2611	1579	5370				controls	511	2348	2511	5370
		total	2158	5323	3052	10533				total	2195	5203	3135	10533				total	1091	4671	4771	10533
	17:44808360:G:A								17:44062603:A:G
			A/A	A/G	G/G	*/*					G/G	G/A	A/A	*/*
17:44781143:C:A	C/C	cases	1	5	226	232		17:44004442:T:G	G/G	cases	238	154	27	419
		controls	0	4	346	350				controls	207	136	21	364
		total	1	9	572	582				total	445	290	48	783
	C/A	cases	3	722	936	1661			G/T	cases	425	1268	406	2099
		controls	5	752	1222	1979				controls	402	1272	380	2054
		total	8	1474	2158	3640				total	827	2540	786	4153
	A/A	cases	527	1622	1121	3270			T/T	cases	171	1068	1406	2645
		controls	530	1475	1036	3041				controls	164	1073	1715	2952
		total	1057	3097	2157	6311				total	335	2141	3121	5597
	*/*	cases	531	2349	2283	5163			*/*	cases	171	1068	1839	5163
		controls	535	2231	2604	5370				controls	773	2481	2116	5370
		total	1066	4580	4887	10533				total	1607	4971	3955	10533
